# 1 Detecting adaptive introgression in human evolution using 2 convolutional neural networks

3 Graham Gower<sup>1,\*</sup>, Pablo Iáñez Picazo<sup>1</sup>, Matteo Fumagalli<sup>2</sup>, Fernando Racimo<sup>1</sup>

<sup>1</sup>Lundbeck GeoGenetics Centre, GLOBE Institute, Faculty of Health and Medical Sciences,  
University of Copenhagen, Denmark.

<sup>2</sup>Department of Life Sciences, Silwood Park campus,  
Imperial College London, United Kingdom.

\*Corresponding author: [graham.gower@gmail.com](mailto:graham.gower@gmail.com)

4 September 18, 2020

## 5 Abstract

6 Studies in a variety of species have shown evidence for positively selected variants introduced into  
7 one population via introgression from another, distantly related population—a process known as  
8 adaptive introgression. However, there are few explicit frameworks for jointly modelling intro-  
9 gression and positive selection, in order to detect these variants using genomic sequence data.  
10 Here, we develop an approach based on convolutional neural networks (CNNs). CNNs do not  
11 require the specification of an analytical model of allele frequency dynamics, and have outper-  
12 formed alternative methods for classification and parameter estimation tasks in various areas  
13 of population genetics. Thus, they are potentially well suited to the identification of adaptive  
14 introgression. Using simulations, we trained CNNs on genotype matrices derived from genomes  
15 sampled from the donor population, the recipient population and a related non-introgressed  
16 population, in order to distinguish regions of the genome evolving under adaptive introgression  
17 from those evolving neutrally or experiencing selective sweeps. Our CNN architecture exhibits  
18 95% accuracy on simulated data, even when the the genomes are unphased, and accuracy de-  
19 creases only moderately in the presence of heterosis. As a proof of concept, we applied our  
20 trained CNNs to human genomic datasets—both phased and unphased—to detect candidates  
21 for adaptive introgression that shaped our evolutionary history.

## 22 Introduction

23 Ancient DNA studies have shown that human evolution during the Pleistocene was characterised  
24 by numerous episodes of interbreeding between distantly related groups ([Green \*et al.\*, 2010](#); [Reich  
25 \*et al.\*, 2010](#); [Meyer \*et al.\*, 2012](#); [Prüfer \*et al.\*, 2017](#); [Kuhlwilm \*et al.\*, 2016](#)). We now know, for  
26 example, that considerable portions of the modern human gene pool derive from Neanderthals  
27 and Denisovans ([Green \*et al.\*, 2010](#); [Reich \*et al.\*, 2010](#); [Prüfer \*et al.\*, 2014](#)). In the past few  
28 years, several methods have been developed to identify regions of present-day or ancient human  
29 genomes containing haplotypes that were introgressed from other groups of hominins. These  
30 include methods based on probabilistic models ([Sankararaman \*et al.\*, 2014, 2016](#); [Steinrücken  
31 \*et al.\*, 2018](#); [Racimo \*et al.\*, 2017a](#)), on summary statistics ([Vernot & Akey, 2014](#); [Vernot \*et al.\*,](#)

2016; Racimo *et al.*, 2017b) and on ancestral recombination graph reconstructions (Kuhlwilm *et al.*, 2016; Hubisz *et al.*, 2020; Speidel *et al.*, 2019). Presumably, some of the introgressed material may have had fitness consequences in the recipient populations. While recent evidence suggests that a large proportion of Neanderthal ancestry was likely negatively selected (Harris & Nielsen, 2016; Juric *et al.*, 2016), there is also support for positive selection on a smaller proportion of the genome—a phenomenon known as adaptive introgression (AI) (Whitney *et al.*, 2006; Hawks & Cochran, 2006; Racimo *et al.*, 2015).

Genomic evidence for AI has been found in numerous other species, including butterflies (Pardo-Diaz *et al.*, 2012; Enciso-Romero *et al.*, 2017), mosquitoes (Norris *et al.*, 2015), hares (Jones *et al.*, 2018), poplars (Suarez-Gonzalez *et al.*, 2016) and monkeyflowers (Hendrick *et al.*, 2016). A particularly striking example is AI in dogs, which appears to show strong parallels to AI in humans when occupying the same environmental niches. For example, a variant of the gene *EPAS1* has been shown to have introgressed from an archaic human population into the ancestors of Tibetans, and subsequently risen in frequency in the latter population, as a consequence of positive selection to high altitude (Huerta-Sánchez *et al.*, 2014). A different high-frequency *EPAS1* variant is also uniquely found in Tibetan Mastiffs, and appears to also have introgressed into this gene pool via admixture with a different species, in this case Tibetan wolves (Miao *et al.*, 2016), likely due to the same selective pressures.

To detect AI, researchers can look for regions of the genome with a particularly high frequency of introgressed haplotypes from a donor species or population into a recipient species or population. These haplotypes are often detected assuming neutrality of archaic alleles since the introgression event (Vernot *et al.*, 2016; Vernot & Akey, 2014; Sankararaman *et al.*, 2016, 2014). Other studies have designed statistics that are sensitive to characteristic patterns left by AI, using simulations incorporating both admixture and selection (Gittelman *et al.*, 2016; Racimo *et al.*, 2017b). More recently, Setter *et al.* (2020) developed a likelihood framework to look for local alterations to the site frequency spectrum that are consistent with adaptive introgression, using only data from the recipient species. The main challenge that these studies face is that it is hard to jointly model selection from material introduced via admixture (Racimo *et al.*, 2015).

To overcome the need to compress data into summary statistics (which might miss important features) or solve complex analytical theory, deep learning techniques are increasingly becoming a popular solution to address problems in population genetics. These problems include the inference of demographic histories (Sheehan & Song, 2016; Flagel *et al.*, 2018; Villanea & Schraiber, 2019; Mondal *et al.*, 2019; Sanchez *et al.*, 2020), admixture (Blischak *et al.*, 2020), recombination (Chan *et al.*, 2018; Flagel *et al.*, 2018; Adrion *et al.*, 2020b) and natural selection (Schridder & Kern, 2018; Sheehan & Song, 2016; Torada *et al.*, 2019; Isildak *et al.*, 2020). Deep learning is a branch of machine learning that relies on algorithms structured as multi-layered networks, which are trained using known relationships between the input data and the desired output. They can be used for classification, prediction or data compression (Aggarwal *et al.*, 2018). Among the techniques in this field, convolutional neural networks (CNNs) are a family of methods originally designed for image recognition and segmentation (LeCun *et al.*, 1995; Krizhevsky *et al.*, 2012), which have been recently applied to population genetic data (Chan *et al.*, 2018; Flagel *et al.*, 2018; Torada *et al.*, 2019; Isildak *et al.*, 2020; Blischak *et al.*, 2020; Sanchez *et al.*, 2020). A CNN can learn complex spatial patterns from large datasets that may be informative for classification or prediction, using a series of linear operations known as convolutions, to compress the data into features that are useful for inference.

Despite the recent advances in deep learning for population genetics, no significant attempts have been proposed to identify AI from population genomic data. Here, we develop a deep learning method called **genomatnn** that jointly models archaic admixture and positive selection, in order to identify regions of the genome under adaptive introgression. We trained a CNN

81 to learn relevant features directly from a genotype matrix at a candidate region, containing  
82 data from the donor population, the recipient population and a unadmixed outgroup. The  
83 method has >88% precision to detect AI, and is effective on both ancient and recently selected  
84 introgressed haplotypes. We then applied our method to population genomic datasets where  
85 the donor population is either Neanderthals or Denisovans and the recipient populations are  
86 Europeans or Melanesians, respectively. In each case, we used the Yoruba population as a  
87 unadmixed outgroup and we were able to both recover previously identified AI regions and  
88 unveil new candidates for AI in human history.

## 89 Results

### 90 A CNN for detecting adaptive introgression

91 In our method, we assumed we have sequence data from multiple populations: the donor popu-  
92 lation and the recipient population in an admixture event, as well as an unadmixed population  
93 that is a sister group to the recipient (Fig. 1A). We constructed an  $n \times m$  matrix for  $n$  hap-  
94 lotypes (or diploid genotypes, for unphased data), where each entry corresponds to the count  
95 of minor alleles in an individual's haplotype (or diploid genotype), for a  $\frac{100}{m}$  kbp region of the  
96 genome. Within each population, we sorted these pseudo-haplotypes (or genotypes) according  
97 to similarity to the donor population, and concatenated the matrices for each of the populations  
98 into a single pseudo-genotype matrix (Fig. 1B).

99 We designed a CNN (Fig. 1C) that takes this concatenated matrix as input to distinguish  
100 between adaptive introgression scenarios and other types of neutral or selection scenarios. The  
101 CNN was trained using simulations, and uses a series of convolution layers with successively  
102 smaller outputs, to extract increasingly higher-level features of the genotype matrices—features  
103 which are simultaneously informative of introgression and selection. The CNN outputs the prob-  
104 ability that the input matrix comes from a genomic region that underwent adaptive introgression.  
105 As our simulations used a wide range of selection coefficients and times of selection onset, the  
106 network does not assume these parameters are known a priori, and is able to detect complete or  
107 incomplete sweeps at any time after gene flow.

108 Our method has several innovative features relative to previous population genetic imple-  
109 mentations of CNNs (described extensively in the Methods section). For example, when loading  
110 the genotype matrices as input, we implemented an image resizing scheme that leads to fast  
111 training times, while avoiding the drawbacks of similar methods (Torada *et al.*, 2019), by pre-  
112 serving inter-allele distances and thus the local density of segregating sites. Additionally, instead  
113 of using pooling layers, we used a 2x2 step size when performing convolutions. This has the  
114 same effect as pooling, in that the output size is smaller than the input, so the accuracy of the  
115 model is unaffected relative to traditional implementations of CNNs, but it has a much lower  
116 computational burden (Springenberg *et al.*, 2015).

117 Furthermore, we incorporated a framework to visualise the features of the input data that  
118 draw the most attention from the CNN, by plotting saliency maps from the `keras-vis` library  
119 (Kotikalapudi & contributors, 2017). Saliency maps can help to understand which regions of the  
120 genotype matrix contribute the most toward the CNN prediction score (Fig. 3).

121 We also provide downloadable pre-trained CNNs as well as a pipeline for training new CNNs  
122 (see Methods). These interface with a new selection module that we designed and incorporated  
123 into the `stdpopsim` framework (Adrion *et al.*, 2020a), using the forwards-in-time simulator SLiM  
124 (Haller & Messer, 2019). We believe this will facilitate the application of the method to other  
125 datasets, allowing users to modify its parameters according to the specific requirements of the  
126 biological system under study.

## 127 Performance on simulations

128 We aimed to assess the performance of our method on simulations. We performed simulations  
129 under two different demographic models:

- 130 • Demographic model A: a three-population model including an African, a European and a  
131 Neanderthal population, with Neanderthal gene flow into Europeans (Fig. 1A)
- 132 • Demographic model B: a more complex model, including an African, a Melanesian, a  
133 Neanderthal and a Denisovan population, with two pulses of Denisovan gene flow into  
134 Melanesians, plus a pulse of Neanderthal gene flow into non-Africans, based on Jacobs  
135 *et al.* (2019) (Fig. S1).

136 When training a CNN on Demographic Model A using phased data, we obtained a precision  
137 of 90.2% (proportion of AI predictions that were AI simulations) and 97.9% negative predictive  
138 value (NPV; proportion of “not-AI” predictions that were either neutral or sweep simulations)  
139 (Figs. 2 and S8). The network output higher probabilities for AI simulations with larger selection  
140 coefficients, and for older times of onset of selection. We also observed that the network falsely  
141 classified neutral simulations as AI more frequently than it falsely classified sweep simulations.  
142 When the CNN was trained on this same demographic model assuming genotypes were unphased,  
143 the results were very similar, with 88.1% precision and 98.7% NPV (Fig. S7).

144 When training a CNN on Demographic Model B (assuming unphased genotypes, as accurately  
145 phased data is not readily available for Melanesian genomes), we obtained 88.8% precision and  
146 82.5% NPV (Figs. S10 and S11). We note here that the network had greater precision when  
147 detecting AI derived from the more ancient pulse of Denisovan gene flow than the younger pulse.

148 Kim *et al.* (2018) and Zhang *et al.* (2020) recently suggested that introduced genetic material  
149 can mask deleterious recessive variation and produce a signal very similar to adaptive introgression.  
150 To assess whether heterosis following introgression affects the false positive rates in our  
151 CNN, we simulated a distribution of fitness effects (DFE) with recessive dominance for 70% of  
152 derived mutations (the rest were simulated as neutral), and found this only slightly increases the  
153 false positive rate (Figs. 2, S8, S10 and S11).

154 We further tested whether the method was robust to demographic misspecification, by evalu-  
155 ating the CNN trained on Demographic Model A against simulations for Demographic Model B.  
156 As there are more Melanesian individuals than European individuals in our simulations (because  
157 we aimed to mimic the real number of genomes available in our data analysis below), we down-  
158 sampled the Melanesian genomes to match the number of European genomes, so as to perform  
159 a fair misspecification comparison. In this case, we found the precision dropped to 65.3% and  
160 the NPV to 74.4% (Fig. S6).

## 161 Network attention

162 To understand which features of the input matrices were used by the CNN to make its predictions,  
163 we constructed saliency maps (Simonyan *et al.*, 2014). This technique works by computing the  
164 gradient of a network’s output with respect to a single input. Thus, highlighted regions from the  
165 saliency map indicate where small changes in the input matrix have a relatively large influence  
166 over the CNN output prediction. We calculated an average saliency map for each output category  
167 predicted by the network (AI or not-AI), for a CNN trained on Demographic Model A (Fig. 3).  
168 Our results show that when the network was presented with an AI matrix, it focused most of  
169 the attention on the Neanderthal and European haplotypes, while not putting much emphasis  
170 on the African haplotypes. In non-AI scenarios, the network focused sharply on the Neanderthal  
171 and left-most European haplotypes. The saliency maps also show a concentration of attention in

172 the central region of the genomic window, around where the selected mutation was drawn (even  
173 though this mutation was removed before constructing genotype matrices; see Methods).

## 174 Calibration

175 We implemented a score calibration scheme to account for the fact that our simulation categories  
176 (neutrality, sweep and AI) will be highly imbalanced in real data applications (Guo *et al.*, 2017;  
177 Kull *et al.*, 2017). CNN classifiers sometimes produce improperly calibrated probabilities (Guo  
178 *et al.*, 2017). In our case, this occurs because the proportion of each category is not known in  
179 reality, and thus does not match the simulated proportion. For this reason, we fitted our calibra-  
180 tion procedure using training data resampled with various ratios of neutral:sweep:AI simulations  
181 (Fig. 4). We tested different calibration methods by fitting the calibrator to the training dataset,  
182 and inspecting reliability plots and the sum of residuals on a validation dataset (see Methods).

## 183 Candidates for Neanderthal adaptive introgression in European genomes

184 We applied our method to a combined genomic panel of archaic hominins (Prüfer *et al.*, 2017,  
185 2014; Meyer *et al.*, 2012) and present-day humans (The 1000 Genomes Project Consortium, 2015;  
186 Jacobs *et al.*, 2019), to look for regions of the genome where Non-African humans show signatures  
187 of AI from archaic hominins. First, we looked for Neanderthal introgression into the ancestors  
188 of Northwestern Europeans (CEU panel), using Yoruba Africans (YRI panel) as the unadmixed  
189 sister population. We used two different beneficial-allele frequency cutoffs for training: 5% and  
190 25% (Tables 1 and S2). We focus here on describing the results from the 25% condition (Figs. S12  
191 to S25). We found several candidate genes for AI that have been reported before (Sankararaman  
192 *et al.*, 2014, 2016; Vernot & Akey, 2014; Gittelman *et al.*, 2016; Racimo *et al.*, 2017b), including  
193 *BNC2*, *KCNQ2/EEF1A2* *WRD88/GPATCH1* and *TANC1*.

194 However, the candidate region we identify on chromosome 2 around *TANC1* extends farther  
195 downstream of this gene, also overlapping *BAZ2B* (Fig. S14). This codes for a protein related to  
196 chromatin remodelling, and may have a role in transcriptional activation. Mutations in *BAZ2B*  
197 have recently been associated with neurodevelopmental disorders, including developmental de-  
198 lay, autism spectrum disorder and intellectual disability (Scott *et al.*, 2020). Additionally, we  
199 found two novel candidates for AI that have not been previously reported, spanning the regions  
200 chr6:28.18Mb–28.32Mb (Fig. S18) and chr20:62.1Mb–62.28Mb (Fig. S24), including multiple  
201 genes encoding zinc finger proteins.

## 202 Candidates for Denisovan adaptive introgression in Melanesian genomes

203 We then looked for Denisovan AI in Melanesian genomes from the IGDP panel (Jacobs *et al.*,  
204 2019), also using Yoruba Africans as the unadmixed sister group, using two different beneficial-  
205 allele frequency cutoffs for training: 5% and 25% (Tables 2 and S3). Again, we focus on describing  
206 the results from the 25% condition (Figs. S26 to S47). Among the top candidates, we found a  
207 previously reported candidate for AI in Melanesians: *TNFAIP3* (Vernot *et al.*, 2016; Gittelman  
208 *et al.*, 2016). Denisovan substitutions carried by the introgressed haplotype in this gene have  
209 been found to enhance the immune response by tuning the phosphorylation of the encoded A20  
210 protein, which is an immune response inhibitor (Zammit *et al.*, 2019).

211 We found evidence for Denisovan AI in Melanesians at several other candidate regions. A  
212 few of these regions (or contiguous regions) were previously reported by Sankararaman *et al.*  
213 (2016) but not extensively described, possibly because the previously reported sections of those  
214 regions deemed to be introgressed were intergenic. One of the regions with strong evidence for AI

215 (chr7:25.1Mb–25.2Mb; Fig. S33) overlaps the *CYCS* gene. This gene codes for cytochrome C: a  
216 small heme protein that plays a crucial role in the electron transport chain in mitochondria, and  
217 has been associated with various blood-related diseases, like thrombocytopenia (Morison *et al.*,  
218 2008; De Rocco *et al.*, 2014; Uchiyama *et al.*, 2018). Another top candidate region (chr12:108.24-  
219 108.34Mb, Fig. S38) is upstream of *PRDM4* and *ASCL4*. The former gene codes for a transcrip-  
220 tion factor that may be involved in the nerve growth factor cell survival pathway and play a role  
221 in tumour suppression (Yang & Huang, 1999). The latter gene codes for a different transcription  
222 factor that may be involved in skin development (Jonsson *et al.*, 2004).

223 We detected signatures of Denisovan AI in a region in chromosome 3 near *SUMF1* and *LRNN1*  
224 (Fig. S27), which was also identified in Jacobs *et al.* (2019). *SUMF1* codes for an enzyme involved  
225 in the hydrolysis of sulfate esters, which has been associated with sulfatase deficiency (Cosma  
226 *et al.*, 2003), while *LRNN1* encodes a protein involved in neuronal differentiation, which has been  
227 associated with neuroblastoma and Alzheimer’s disease (Bai *et al.*, 2014; Hossain *et al.*, 2012).  
228 Another candidate region is in chromosome 7 and is upstream of *SFRP4* (Fig. S34), which  
229 encodes a protein associated with diabetes (Mahdi *et al.*, 2012) and Pyle’s disease (Simsek Kiper  
230 *et al.*, 2016). Moreover, there is also a candidate region upstream of *RAB27A*, in chromosome 15  
231 (Fig. S43). Mutations in this gene cause Griscelli syndrome, which results in pigmentary dilution  
232 in the hair and skin, as well as melanosome accumulation in melanocytes (Ménasché *et al.*, 2000).  
233 Finally, we found evidence for Denisovan AI in two nearby regions in chromosome 14 (Figs. S40  
234 and S41). One of these overlaps with *PRKCH*—encoding a protein kinase associated with  
235 cerebral infarction (Kubo *et al.*, 2007). The other overlaps with *KCNH5*—coding for a potassium  
236 channel that may be associated with epileptic encephalopathy (Veeramah *et al.*, 2013).

## 237 Discussion

238 We have developed a new method to detect adaptive introgression along the genome using con-  
239 volutional neural networks. The method has high precision when reporting candidate AI loci,  
240 and high negative predictive value when rejecting loci as not-AI: we obtain greater than 90%  
241 accuracy under a variety of different selection scenarios (Table S4), with low false positive rates.

242 As reported previously (Kim *et al.*, 2018; Zhang *et al.*, 2020), heterosis following introgression  
243 can produce patterns very similar to AI, and we found this can inflate false positive detection of  
244 AI by our CNN. However, we simulated a DFE with recessive dominance for all mutations, which  
245 is not realistic in general, so our results in this regard represent a worse case scenario. A possible  
246 future improvement would be to train the CNN on simulations incorporating heterosis. We did  
247 not attempt this here because realistic DFE simulations represent a substantial computational  
248 burden.

249 The CNN took approximately 15 minutes to train on one NVIDIA Tesla T4 GPU, which  
250 amounts to 60 CPU hours for an equivalent CPU-only training procedure. All data were loaded  
251 into memory, which required approximately 120 GB RAM during training. The computational  
252 bottleneck lay in the generation of SLiM forward simulations: 300,000 simulations took approx-  
253 imately 80 weeks of CPU time for each of the demographic models. In the future, considerable  
254 speedups could potentially be obtained by optimising the simulation step, perhaps by imple-  
255 menting an adaptive introgression simulation framework that takes advantage of the backwards  
256 coalescent (e.g. building on the work by Setter *et al.*, 2020).

257 We applied the method to human data, to look for adaptive introgression from archaic hu-  
258 mans into the ancestors of present-day human genomes. When looking for Neanderthal AI  
259 in European genomes, we find previously found candidate genes (*BNC2*, *WRD88/GPATCH1*,  
260 *KCNQ2/EEF1A2*, *TANC1/BAZ2B*). We also recover candidates for adaptive introgression from

261 Denisovans by applying our method to unphased Melanesian genomes. The top candidates in-  
262 clude *TNFAIP3*, which has been reported before, but also include other, novel regions, contain-  
263 ing genes involved in blood diseases (*CYCS*), neurological diseases (*PRKCH*, *KCNH5*, *LRNN1*),  
264 metabolism (*SFRP4*, *SUMF1*) and skin development (*ASCL4*, *RAB27A*).

265 We note, however, that, as with previous methods, visual inspection of the haplotypes or  
266 genotypes of the top candidate regions remains a necessary criterion to accurately assess whether  
267 a region may have been under adaptive introgression. For example, in the scans we performed,  
268 we found a few candidate regions for Neanderthal AI in Europeans that are likely to be false  
269 positives, e.g. chr2:109360001–109460000; chr4:54240001–54340000; chr8:143440001–143540000.  
270 These appear to be the result of shared ancestral variation with African populations, and yet  
271 are classified as having high probability of being under AI. Thus, our method allows for a rapid  
272 scan and prioritisation of potential targets, but these need to be further assessed for veracity and  
273 any functional consequence. Inclusion of more complex selection scenarios, involving positive or  
274 balancing selection on ancestral variation, as well as linked selection, might serve to ameliorate  
275 the rate of false positives in the future.

276 Furthermore, our simulation procedure does not model genotype errors or data missingness.  
277 Not explicitly accounting for this may negatively impact the robustness of the minor allele density  
278 computation and the subsequent haplotype sorting procedure, and, in turn, affect the accuracy  
279 of the CNN.

280 The precision of our method necessarily depends upon the demographic history of the pop-  
281 ulations involved. We found it more challenging to detect AI when the timing of gene flow is  
282 younger or the introgressing population is more diverged from the panel that is used to represent  
283 it. This is apparent when comparing results for the Neanderthal-into-European demographic  
284 scenario and the Denisovan-into-Melanesian demographic scenario. In the former, gene flow is  
285 more recent ( $\sim 55$  kya versus  $\sim 50$  kya and  $\sim 30$  kya) (Sankararaman *et al.*, 2016; Jacobs *et al.*,  
286 2019) and sequences are available for a population closely related to the putative source, which  
287 increases power. Furthermore, for the two putative pulses of Denisovan gene flow (Jacobs *et al.*,  
288 2019), we find our model has greater precision with AI for the more ancient pulse (94 % versus  
289 83.6 %; Fig. S11), likely because haplotypes from the older pulse have more time to rise in fre-  
290 quency. We also found that distinguishing AI from a selective sweep (hard or soft), is relatively  
291 easier than distinguishing AI from neutral variation, and that the time of onset of selection in  
292 an AI scenario has little bearing on accuracy unless the onset is very recent.

293 Our method requires sequencing data from the population from which the introgression event  
294 originated. This may be problematic in cases where the source of introgression may be distantly  
295 related to the population genomic panel that is used to represent it. Future work could involve  
296 developing a CNN that can detect adaptive introgression from a ghost (unsampled) population,  
297 for cases in which genomic data from the source is unavailable (e.g. see Setter *et al.*, 2020).

298 The method can take either phased or unphased data as input. This flexibility allows for its  
299 application to a range of study systems in the future, in which phasing may not be financially  
300 or methodologically feasible. It does, however, require called genotypes and is therefore not yet  
301 suitable for genomes sequenced at low coverage. One could envision extending the framework  
302 developed here to low-coverage genomes by working with matrices of genotype likelihoods (Kor-  
303 neliusen *et al.*, 2014) rather than matrices of genotypes or haplotypes. A CNN could learn the  
304 relationship between the observed likelihoods under a given model and the model parameters  
305 that generated those likelihoods, but we leave that to a future work.

306 Future studies could also address the fact that we must use simulations to train the network,  
307 which involves an implicit amount of supervision by the user. The range of parameters and models  
308 that are simulated during training are necessarily hand-selected a priori, and misspecification does  
309 negatively affect CNN performance. Progress in this regard could involve the use of generative

310 adversarial networks (GANs), which appears to be a fruitful way to address this. Indeed, recent  
311 work suggests that one can train a GAN to learn to generate realistic population genomic data  
312 for any population (Wang *et al.*, 2020).

313 The attention analyses performed here allowed only a posteriori reasoning on how the network  
314 learned to predict AI, so further work is encouraged in this area. For instance, interpretabil-  
315 ity of neural networks can be assessed using symbolic metamodelling (Alaa & van der Schaar,  
316 2019) with reinforcement learning algorithms deployed to identify the subset of most informative  
317 features of input data (Yoon *et al.*, 2019). In this context, such approaches should be able to  
318 pinpoint the important characteristics of genomic data, and possibly derive more informative  
319 summary statistics to predict complex evolutionary events.

320 In summary, we have shown that CNNs are a powerful approach to detecting adaptive in-  
321 trogression and can recover both known and novel selection candidates that were introduced  
322 via admixture. As in previous applications to other problems in the field (Sheehan & Song,  
323 2016; Flagel *et al.*, 2018; Schrider & Kern, 2018; Villanea & Schraiber, 2019; Mondal *et al.*,  
324 2019; Torada *et al.*, 2019; Isildak *et al.*, 2020), this exemplifies how deep learning can serve as  
325 a very powerful tool for population genetic inference. This type of technique may thus be a  
326 useful resource for future studies aiming to unravel our past history and that of other species, as  
327 statistical methodologies and computational resources continue to improve.

## 328 Methods

### 329 Simulations

330 For CNN training, we performed simulations under three scenarios: neutral mutations only;  
331 positive selection of a de novo mutation in the recipient population (selective sweep); and positive  
332 selection of a derived mutation that was transferred via gene flow from the donor population to  
333 the recipient population (adaptive introgression, AI). In the sweep and AI scenarios, the selection  
334 coefficient was drawn log-uniformly from between 0.0001 and 0.1 for Europeans and between 0.001  
335 and 0.1 for Melanesians. The uniformly distributed time of mutation was decoupled from the  
336 uniformly distributed time of selection onset (thus allowing for soft sweeps). For the selective  
337 sweep scenario, the mutation and selection times could occur at any time older than 1 kya but  
338 more recent than the split between the recipient population and its unadmixed sister population,  
339 with the constraint that the mutation must be introduced before the onset of selection. For the  
340 AI scenario, a neutrally evolving mutation was introduced to the donor population any time  
341 more recent than the split between the donor and the ancestor of recipient and unadmixed  
342 sister population, but older than 1 kya before the introgression event. Then, this mutation was  
343 transmitted to the recipient population, whereupon selection could start to act on it at any time  
344 after introgression but before 1 kya.

345 We further evaluated our trained CNNs using an additional 10,000 simulations that incorpo-  
346 rated a DFE using the parameters estimated in Kim *et al.* (2017) and used in Kim *et al.* (2018).  
347 We considered two mutation types: 30 % neutral and 70 % deleterious. The deleterious portion  
348 of introduced mutations had a selection coefficient drawn from a reflected gamma distribution  
349 with shape parameter 0.186, and expected value -0.01314833. We approximated the dominance  
350 scheme from Kim *et al.* (2018), using a fixed dominance coefficient for deleterious mutations of  
351  $0.5/(1 - 7071.07 * E[s])$  where  $E[s]$  is the expected value from the gamma distribution (i.e. all  
352 deleterious mutations were effectively recessive).

353 To incorporate selection, we implemented a new module in `stdpopsim` (Adrion *et al.*, 2020a)  
354 (available from <https://github.com/popsim-consortium/stdpopsim/pull/462>), which lever-  
355 ages the forwards-in-time simulator SLiM (Haller & Messer, 2019) for simulating selection. For



356 consistency, we also used `stdpopsim`'s SLiM engine for neutral simulations. `stdpopsim` uses  
357 SLiM's ability to output tree sequences (Haller *et al.*, 2019), which retains complete information  
358 about the samples' marginal genealogies. Further, `stdpopsim` recapitulates the tree sequences (en-  
359 suring that all sampled lineages have a single common ancestor), and applies neutrally evolving  
360 mutations to the genealogies, using the coalescent framework of `msprime` (Kelleher *et al.*, 2016).

361 We simulated 100 kbp regions, with a mutation rate of  $1.29 \times 10^{-08}$  per site per genera-  
362 tion (Tian *et al.*, 2019), an empirical recombination map drawn uniformly at random from the  
363 HapMapII genetic map (Frazer *et al.*, 2007), and the selected mutation introduced at the re-  
364 gion's midpoint. For both the sweep scenario and the AI scenario, we used a rejection-sampling  
365 approach to condition on the selected allele's frequency being  $\geq 1\%$  in the recipient population  
366 at the end of the simulation. This was done by saving the simulation state prior to the intro-  
367 duction of the selected mutation (and saving again after successful transmission to the recipient  
368 population, for the AI scenario), then restoring simulations to the most recent save point if the  
369 mutation was lost, or if the allele frequency threshold was not met at the end of the simulation.

370 To speed up simulations, we applied a scaling factor of  $Q = 10$ . Scaling divides population  
371 sizes ( $N$ ) and event times ( $T$ ) by  $Q$ , and multiplies the mutation rate  $\mu$ , recombination rate  $r$   
372 and selection coefficient  $s$  by  $Q$ , such that the population genetic parameters  $\theta = 4N\mu$ ,  $\rho = 4Nr$ ,  
373 and  $Ns$  remain approximately invariant to the applied scaling factor (Haller & Messer, 2019).  
374 After simulating, we further filtered our AI scenario simulations to exclude those that ended  
375 with a minor beneficial allele frequency less than a specific cutoff. We tried two cutoffs—5% and  
376 25%—and present results for both. Rejection sampling within SLiM was not possible at these  
377 higher thresholds, as simulations often had low probability of reaching the threshold, particularly  
378 for recently introduced mutations.

379 To investigate Neanderthal gene flow into Europeans, we simulated an out-of-Africa demo-  
380 graphic model with a single pulse of Neanderthal gene flow into Europeans but not into African  
381 Yoruba (Fig. 1A), using a composite of previously published model parameters (Table S1). The  
382 number of samples to simulate for each population was chosen to match the YRI and CEU panels  
383 in the 1000 Genomes dataset (The 1000 Genomes Project Consortium, 2015), and the two high  
384 coverage Neanderthal genomes (Prüfer *et al.*, 2014, 2017). The two simulated Neanderthals were  
385 sampled at times corresponding to the estimated ages of the samples as reported in Prüfer *et al.*  
386 (2017).

387 To investigate Denisovan gene flow into Melanesian populations, we simulated an out-of-  
388 Africa demographic history incorporating two pulses of Denisovan gene flow (Malaspinas *et al.*,  
389 2016; Jacobs *et al.*, 2019) implemented as the `PapuansOutOfAfrica_10J19` model in `stdpopsim`  
390 (Adrion *et al.*, 2020a). For this demographic model we sampled a single Denisovan and a single  
391 Neanderthal (with sampling time of the latter corresponding to the Altai Neanderthal's estimated  
392 age). The number of Melanesian samples was chosen to match a subset of the IGDP panel (Jacobs  
393 *et al.*, 2019). The Baining population of New Britain was excluded at the request of the IGDP  
394 data access committee, and we also excluded first degree relatives, resulting in a total of 139  
395 Melanesian individuals used in the analysis. As this demographic model includes two pulses of  
396 Denisovan admixture, we simulated half of our AI simulations to correspond with gene flow from  
397 the first pulse, and half from the second pulse.

## 398 Conversion of simulations to genotype matrices

399 We converted the tree sequence files from the simulations into genotype matrices using the `tskit`  
400 Python API (Kelleher *et al.*, 2016). Major alleles (those with sample frequency greater than 0.5  
401 after merging all individuals) were encoded in the matrix as 0, while minor alleles were encoded  
402 as 1. In the event of equal counts for both alleles, the major allele was chosen at random.

403 Only sites with a minor allele frequency  $> 5\%$  were retained. For sweep and AI simulations, we  
404 excluded the site of the selected mutation.

405 We note that different simulations result in different numbers of segregating sites, but a  
406 requirement for CNN training is that each datum in a batch must have the same dimensions.  
407 Existing approaches to solve this problem are to use only a fixed number of segregating sites  
408 (Chan *et al.*, 2018), to pad the matrix out to the maximum number of observed segregating sites  
409 (Flagel *et al.*, 2018), or to use an image-resize function to constrain the size of the input data  
410 (Torada *et al.*, 2019). Each approach discards spatial information about the local density of  
411 segregating sites, although this may be recovered by including an additional vector of inter-site  
412 distances as input to the network (Flagel *et al.*, 2018).

413 To obtain the benefits of image resizing (fast training times for reduced sizes and easy ap-  
414 plication to genomic windows of a fixed size), while avoiding its drawbacks, we chose to resize  
415 our input matrices differently, and only along the dimension corresponding to sites. To resize  
416 the genomic window to have length  $m$ , the window was partitioned into  $m$  bins, and for each  
417 individual haplotype we counted the number of minor alleles observed per bin. Compared with  
418 interpolation-based resizing (Torada *et al.*, 2019), binning is qualitatively similar, but preserves  
419 inter-allele distances and thus the local density of segregating sites. Furthermore, as we do not  
420 resize along the dimension corresponding to individuals, this also permits the use of permutation-  
421 invariant networks (Chan *et al.*, 2018), although we do not pursue that network architecture here.

422 We report results for  $m = 256$ , but also tried  $m = 32$ , 64, and 128 bins. Preliminary results  
423 indicated greater training and validation accuracy for CNNs trained with more bins, around 1%  
424 difference between both 32 and 64, and 64 and 128, although only marginal improvement for 256  
425 compared with 128 bins. When matching unphased data, we combined genotypes by summing  
426 minor allele counts between the chromosomes of each individual. We note that all data were  
427 treated as either phased, or unphased, and no mixed phasing was considered.

428 We then partitioned the resized genotype matrix into submatrices by population. Subma-  
429 trices were ordered left-to-right according to the donor, recipient, and unadmixed populations  
430 respectively. For genotype matrices including both Neanderthals and Denisovans, we placed  
431 the non-donor archaic population to the left of the donor. To ensure that a non-permutation-  
432 invariant CNN could learn the structure in our data, we sorted the haplotypes (Flagel *et al.*,  
433 2018; Torada *et al.*, 2019). The resized haplotypes/individuals within each submatrix were or-  
434 dered left-to-right by decreasing similarity to the donor population, calculated as the Euclidean  
435 distance to the average minor-allele density of the donor population (analogous to a vector of  
436 the donor allele frequencies). An example (phased) genotype matrix image for an AI simulation  
437 is shown in Fig. 1B.

438

## 439 Conversion of empirical data to genotype matrices

440 Using `bcftools` (Li, 2011), we performed a locus-wise intersection of the following VCFs: 1000  
441 Genomes (The 1000 Genomes Project Consortium, 2015), IGDP (Jacobs *et al.*, 2019), the high  
442 coverage Denisovan genome (Meyer *et al.*, 2012), and the Altai and Vindija Neanderthal genomes  
443 (Prüfer *et al.*, 2014, 2017). All VCFs corresponded to the GRCh37/hg19 reference sequence.  
444 Genotype matrices were constructed by parsing the output of `bcftools query` over 100 kbp  
445 windows, filtering out sites with sample allele frequency  $< 5\%$  or with more than 10% of geno-  
446 types missing, then excluding windows with fewer than 20 segregating sites. Each genotype  
447 matrix was then resized and sorted as described for simulations. When data were considered to  
448 be phased, as for the CEU/YRI populations, we also treated the Neanderthal genotypes as if they  
449 were phased according to REF/ALT columns in the VCF. While this is equivalent to random

450 phasing, both high-coverage Neanderthal individuals are highly inbred, so this is unlikely to be  
451 problematic in practice.

452

## 453 CNN model architecture and training

454 We implemented the CNN model in Keras (Chollet *et al.*, 2015), configured to use the Tensorflow  
455 backend (Abadi *et al.*, 2015). To save disk space and memory, the input matrices were stored  
456 as 8 bit integers rather than floating point numbers, and were not mean-centred or otherwise  
457 normalised prior to input into the network. We instead made the first layer of our network a  
458 batch normalisation layer, which converts the input layer to floating point numbers and learns  
459 the best normalisation of the data for the network.

460 The CNN architecture (Fig. 1C) consists of  $k$  convolution blocks each comprised of a batch  
461 normalisation layer followed by a 2D convolution layer with 2x2 stride, 16 filters of size 4x4, and  
462 leaky ReLU activation. The  $k$  blocks are followed by a single fully-connected output node of  
463 size one, with sigmoid activation. We do not include pooling layers, as is common in a CNN  
464 architecture (e.g. Torada *et al.*, 2019), and instead use a 2x2 stride size to reduce the output  
465 size of successive blocks (Springenberg *et al.*, 2015). This is computationally cheaper and had no  
466 observable difference in network performance. We sought to maximise the depth of the network,  
467 but the size of the input layer constrains the maximum number of blocks in the network due to  
468 successive halving of the dimensionality in each block. For  $m = 256$  resizing bins, we used  $k = 7$   
469 blocks.

470 We partitioned 100,000 independent simulations for each of the three selection scenarios  
471 into training and validation sets (approximate 90%/10% split). The model was trained for  
472 three epochs, with model weights updated after batches of 64, using the Adam optimiser and  
473 cross-entropy for the loss function. We evaluated model fit by inspecting loss and accuracy  
474 terms at end of training (Table S4). Preliminary analyses indicated three epochs were sufficient  
475 for approximate convergence between training and validation metrics, but we did not observe  
476 divergence (likely indicating overfitting) even when training for additional epochs.

## 477 Calibration

478 CNNs may produce improperly calibrated probabilities (Guo *et al.*, 2017). For a well calibrated  
479 output, we expect proportion  $x$  of the output probabilities with  $\text{Pr}[\text{AI}] \sim x$  to be true positives.  
480 To calibrate our CNN output, we applied beta calibration (Kull *et al.*, 2017) by fitting a logistic  
481 regression model to our validation data after model training. Beta and other calibration methods  
482 were assessed by fitting the calibrator to the training dataset and inspecting reliability plots on  
483 a validation dataset (Figs. S2 to S5). We also checked if the sum of the residuals was normally  
484 distributed, following the approach of Turner *et al.* (2019). Both beta calibration and isotonic  
485 regression gave well-calibrated probabilities compared with uncalibrated model outputs, and we  
486 chose to apply beta calibration due to its relative simplicity (Kull *et al.*, 2017).

487 The proportion of predictions which are false positives or false negatives depends upon the  
488 relative ratios of AI versus not-AI windows of the genome. This ratio is not known, so we fitted  
489 our calibration procedure using resampled training data with multiple ratios for neutral:sweep:AI  
490 (Fig. 4).

## 491 Saliency maps

492 Saliency maps were computed on, and then averaged over, a set of 100 simulated genotype  
493 matrices for each simulated scenario, using `keras-vis` (Kotikalapudi & contributors, 2017). We

494 applied the `visualize_saliency` function on a a pre-trained CNN, and we configured it to  
495 use the guided backpropagation modifier. A sharper image was obtained by exchanging the  
496 CNN output layer’s sigmoid activation with linear activation, as recommended in the `keras-vis`  
497 documentation.

## 498 Application of trained CNN to empirical datasets

499 We show Manhattan plots where each data point is a 100 kbp window that moves along the  
500 genome in steps of size 20 kbp. Gene annotations were extracted from the Ensembl release 87  
501 GFF3 file (with GRCh37/hg19 coordinates), obtained via ensembl’s ftp server. We extracted the  
502 columns with `source="ensembl_havana"` and `type="gene"`, and report the genes which intersected  
503 with the 30 top ranking CNN predictions or a 100 kbp flanking region. Adjacent regions were  
504 merged together prior to intersection, so that genes were reported only once.

## 505 Compute resources

506 All simulations and results reported here were obtained on an compute server with two Intel Xeon  
507 6248 CPUs (80 cores total), 768 GB RAM, and five NVIDIA Tesla T4 GPUs. 300,000 SLiM  
508 simulations took approximately 80 weeks of CPU time for each of Demographic Model A and B.  
509 Each simulation executes independently, and is readily distributed across cores or compute nodes.  
510 This produced 450 GB of tree sequence files. The resized genotype matrices were compressed  
511 into a Zarr cache (Zarr Development Team, 2020) with size 2.8 GB, for faster loading. Training  
512 a single CNN on one GPU took approximately 15 minutes, or 60 CPU hours for an equivalent  
513 CPU-only training procedure. We did not attempt to optimise memory usage, and thus all data  
514 were loaded into memory, requiring approximately 120 GB RAM during training. Predicting AI  
515 for all genomic windows on an empirical dataset (22 single-chromosome BCF files) took 1 CPU  
516 hour. However, our prediction pipeline uses multiprocessing and efficiently scales to 80 cores.

## 517 Code availability

518 The source code for performing simulations, training and evaluating a CNN, and applying a CNN  
519 to empirical VCF data, were developed in a new Python application called `genomatnn`, avail-  
520 able at <https://github.com/grahamgower/genomatnn>. This work currently depends upon in-  
521 development selection extensions to `stdpopsim` available from [https://github.com/grahamgower/  
522 stdpopsim/tree/selection](https://github.com/grahamgower/stdpopsim/tree/selection), and progress related to merging this into `stdpopsim` can be tracked  
523 at <https://github.com/popsim-consortium/stdpopsim/pull/462>. Python code for visualis-  
524 ing the trained models can be found at <https://github.com/pabloswfly/CNN-vis>.

## 526 Acknowledgements

527 We thank Andrew Kern, Martin Sikora, Flora Jay and Anders Albrechtsen, as well as members  
528 of the Racimo group and the PopSim consortium, for helpful advice and discussions. We also  
529 thank Murray Cox and Georgi Hudjashov for facilitating access to the IGDP data. FR and GG  
530 were funded by a Villum Fonden Young Investigator award to FR (project no. 00025300). MF  
531 was funded by a Leverhulme Research Project grant (RPG-2018-208).

## References

- 532
- 533 Abadi M, Agarwal A, Barham P, Brevdo E, Chen Z, Citro C, Corrado GS, Davis A, Dean J,  
534 Devin M, *et al.* (2015). TensorFlow: large-scale machine learning on heterogeneous systems.  
535 <https://www.tensorflow.org/>
- 536 Adrion JR, Cole CB, Dukler N, Galloway JG, Gladstein AL, Gower G, Kyriazis CC, Ragsdale  
537 AP, Tsambos G, Baumdicker F, *et al.* (2020a). A community-maintained standard library of  
538 population genetic models. *Elife*, **9**:e54967. <https://doi.org/10.7554/eLife.54967>
- 539 Adrion JR, Galloway JG, & Kern AD (2020b). Predicting the landscape of recombination using  
540 deep learning. *Mol Biol Evol*, **37(6)**:1790–1808. <https://doi.org/10.1093/molbev/msaa038>
- 541 Aggarwal CC *et al.* (2018). *Neural networks and deep learning*. Springer
- 542 Alaa AM & van der Schaar M (2019). Demystifying black-box models with symbolic metamodels.  
543 In H Wallach, H Larochelle, A Beygelzimer, Fd Alché-Buc, E Fox, & R Garnett, eds., *Advances*  
544 *in Neural Information Processing Systems 32*, pp. 11304–11314. Curran Associates, Inc.
- 545 Bai Z, Stamova B, Xu H, Ander BP, Wang J, Jickling GC, Zhan X, Liu D, Han G, Jin LW, *et al.*  
546 (2014). Distinctive RNA expression profiles in blood associated with Alzheimer disease after  
547 accounting for white matter hyperintensities. *Alzheimer Dis Assoc Disord*, **28(3)**:226–233.  
548 <https://doi.org/10.1097/WAD.0000000000000022>
- 549 Blischak PD, Barker MS, & Gutenkunst RN (2020). Chromosome-scale inference of hybrid  
550 speciation and admixture with convolutional neural networks. *BioRxiv*. [https://doi.org/](https://doi.org/10.1101/2020.06.29.159673)  
551 [10.1101/2020.06.29.159673](https://doi.org/10.1101/2020.06.29.159673)
- 552 Chan J, Perrone V, Spence J, Jenkins P, Mathieson S, & Song Y (2018). A likelihood-free infer-  
553 ence framework for population genetic data using exchangeable neural networks. In S Bengio,  
554 H Wallach, H Larochelle, K Grauman, N Cesa-Bianchi, & R Garnett, eds., *Advances in Neural*  
555 *Information Processing Systems 31*, pp. 8594–8605. Curran Associates, Inc.
- 556 Chollet F *et al.* (2015). Keras. <https://keras.io>
- 557 Cosma MP, Pepe S, Annunziata I, Newbold RF, Grompe M, Parenti G, & Ballabio A (2003).  
558 The multiple sulfatase deficiency gene encodes an essential and limiting factor for the activity  
559 of sulfatases. *Cell*, **113(4)**:445–456. [https://doi.org/10.1016/S0092-8674\(03\)00348-9](https://doi.org/10.1016/S0092-8674(03)00348-9)
- 560 De Rocco D, Cerqua C, Goffrini P, Russo G, Pastore A, Meloni F, Nicchia E, Moraes CT, Pecci  
561 A, Salviati L, *et al.* (2014). Mutations of cytochrome c identified in patients with thrombo-  
562 cytopenia THC4 affect both apoptosis and cellular bioenergetics. *Biochimica et Biophysica*  
563 *Acta (BBA)-Molecular Basis of Disease*, **1842(2)**:269–274. [https://doi.org/10.1016/j.](https://doi.org/10.1016/j.bbadis.2013.12.002)  
564 [bbadis.2013.12.002](https://doi.org/10.1016/j.bbadis.2013.12.002)
- 565 Enciso-Romero J, Pardo-Díaz C, Martin SH, Arias CF, Linares M, McMillan WO, Jiggins CD,  
566 & Salazar C (2017). Evolution of novel mimicry rings facilitated by adaptive introgression in  
567 tropical butterflies. *Mol Ecol*, **26(19)**:5160–5172. <https://doi.org/10.1111/mec.14277>
- 568 Flagel L, Brandvain Y, & Schrider DR (2018). The unreasonable effectiveness of convolutional  
569 neural networks in population genetic inference. *Mol Biol Evol*, **36(2)**:220–238. [https://doi.](https://doi.org/10.1093/molbev/msy224)  
570 [org/10.1093/molbev/msy224](https://doi.org/10.1093/molbev/msy224)

- 571 Frazer KA, Ballinger DG, Cox DR, Hinds DA, Stuve LL, Gibbs RA, Belmont JW, Boudreau A,  
572 Hardenbol P, Leal SM, *et al.* (2007). A second generation human haplotype map of over 3.1  
573 million SNPs. *Nature*, **449(7164)**:851–861. <https://doi.org/10.1038/nature06258>
- 574 Gittelman RM, Schraiber JG, Vernot B, Mikacenic C, Wurfel MM, & Akey JM (2016). Archaic  
575 hominin admixture facilitated adaptation to out-of-Africa environments. *Current Biology*,  
576 **26(24)**:3375–3382. <https://doi.org/10.1016/j.cub.2016.10.041>
- 577 Green RE, Krause J, Briggs AW, Maricic T, Stenzel U, Kircher M, Patterson N, Li H, Zhai W,  
578 Fritz MHY, *et al.* (2010). A draft sequence of the Neandertal genome. *Science*, **328(5979)**:710–  
579 722. <https://doi.org/10.1126/science.1188021>
- 580 Guo C, Pleiss G, Sun Y, & Weinberger KQ (2017). On calibration of modern neural networks.  
581 *arXiv:1706.04599 [cs]*. ArXiv: 1706.04599
- 582 Haller BC, Galloway J, Kelleher J, Messer PW, & Ralph PL (2019). Tree-sequence recording  
583 in SLiM opens new horizons for forward-time simulation of whole genomes. *Mol Ecol Resour*,  
584 **19(2)**:552–566. <https://doi.org/10.1111/1755-0998.12968>
- 585 Haller BC & Messer PW (2019). SLiM 3: Forward genetic simulations beyond the Wright–Fisher  
586 model. *Mol Biol Evol*, **36(3)**:632–637. <https://doi.org/10.1093/molbev/msy228>
- 587 Harris K & Nielsen R (2016). The genetic cost of Neanderthal introgression. *Genetics*,  
588 **203(2)**:881–891. <https://doi.org/10.1534/genetics.116.186890>
- 589 Hawks J & Cochran G (2006). Dynamics of adaptive introgression from archaic to modern  
590 humans. *PaleoAnthropology*, **2006**:101–115
- 591 Hendrick MF, Finseth FR, Mathiasson ME, Palmer KA, Broder EM, Breigenzer P, & Fishman L  
592 (2016). The genetics of extreme microgeographic adaptation: an integrated approach identifies  
593 a major gene underlying leaf trichome divergence in Yellowstone *Mimulus guttatus*. *Mol Ecol*,  
594 **25(22)**:5647–5662. <https://doi.org/doi.org/10.1111/mec.13753>
- 595 Hossain S, Takatori A, Nakamura Y, Suenaga Y, Kamijo T, & Nakagawara A (2012). NLRR1  
596 enhances EGF-mediated MYCN induction in neuroblastoma and accelerates tumor growth in  
597 vivo. *Cancer Res*, **72(17)**:4587–4596. <https://doi.org/10.1158/0008-5472.CAN-12-0943>
- 598 Hubisz MJ, Williams AL, & Siepel A (2020). Mapping gene flow between ancient hominins  
599 through demography-aware inference of the ancestral recombination graph. *PLoS Genet*,  
600 **16(8)**:e1008895. <https://doi.org/10.1371/journal.pgen.1008895>
- 601 Huerta-Sánchez E, Jin X, Bianba Z, Peter BM, Vinckenbosch N, Liang Y, Yi X, He M, Somel M,  
602 Ni P, *et al.* (2014). Altitude adaptation in Tibetans caused by introgression of Denisovan-like  
603 DNA. *Nature*, **512(7513)**:194. <https://doi.org/10.1038/nature13408>
- 604 Isildak U, Stella A, & Fumagalli M (2020). Distinguishing between recent balancing selection and  
605 incomplete sweep using deep neural networks. *bioRxiv*. <https://doi.org/10.1101/2020.07.31.230706>
- 607 Jacobs GS, Hudjashov G, Saag L, Kusuma P, Darusallam CC, Lawson DJ, Mondal M, Pagani  
608 L, Ricaut FX, Stoneking M, *et al.* (2019). Multiple deeply divergent Denisovan ancestries in  
609 Papuans. *Cell*, **177(4)**:1010–1021.e32. <https://doi.org/10.1016/j.cell.2019.02.035>

- 610 Jones MR, Mills LS, Alves PC, Callahan CM, Alves JM, Lafferty DJ, Jiggins FM, Jensen JD,  
611 Melo-Ferreira J, & Good JM (2018). Adaptive introgression underlies polymorphic seasonal  
612 camouflage in snowshoe hares. *Science*, **360(6395)**:1355–1358. [https://doi.org/10.1126/  
613 science.aar5273](https://doi.org/10.1126/science.aar5273)
- 614 Jonsson M, Mark EB, Brantsing C, Brandner JM, Lindahl A, & Asp J (2004). Hash4, a novel  
615 human achaete-scute homologue found in fetal skin. *Genomics*, **84(5)**:859–866. [https://doi.  
616 org/10.1016/j.ygeno.2004.07.004](https://doi.org/10.1016/j.ygeno.2004.07.004)
- 617 Juric I, Aeschbacher S, & Coop G (2016). The strength of selection against Neanderthal intro-  
618 gression. *PLoS Genet*, **12(11)**:e1006340. <https://doi.org/10.1371/journal.pgen.1006340>
- 619 Kelleher J, Etheridge AM, & McVean G (2016). Efficient coalescent simulation and genealogical  
620 analysis for large sample sizes. *PLoS Comput Biol*, **12(5)**:e1004842. [https://doi.org/10.  
621 1371/journal.pcbi.1004842](https://doi.org/10.1371/journal.pcbi.1004842)
- 622 Kim BY, Huber CD, & Lohmueller KE (2017). Inference of the distribution of selection coef-  
623 ficients for new nonsynonymous mutations using large samples. *Genetics*, **206(1)**:345–361.  
624 <https://doi.org/10.1534/genetics.116.197145>
- 625 Kim BY, Huber CD, & Lohmueller KE (2018). Deleterious variation shapes the genomic land-  
626 scape of introgression. *PLoS Genet*, **14(10)**:e1007741. [https://doi.org/10.1371/journal.  
627 pgen.1007741](https://doi.org/10.1371/journal.pgen.1007741)
- 628 Korneliussen TS, Albrechtsen A, & Nielsen R (2014). ANGSD: analysis of next gener-  
629 ation sequencing data. *BMC Bioinformatics*, **15(1)**:356. [https://doi.org/10.1186/  
630 s12859-014-0356-4](https://doi.org/10.1186/s12859-014-0356-4)
- 631 Kotikalapudi R & contributors (2017). keras-vis. <https://github.com/raghakot/keras-vis>
- 632 Krizhevsky A, Sutskever I, & Hinton GE (2012). Imagenet classification with deep convolutional  
633 neural networks. In *Advances in neural information processing systems*, pp. 1097–1105
- 634 Kubo M, Hata J, Ninomiya T, Matsuda K, Yonemoto K, Nakano T, Matsushita T, Yamazaki  
635 K, Ohnishi Y, Saito S, *et al.* (2007). A nonsynonymous SNP in PRKCH (protein kinase C  $\eta$ )  
636 increases the risk of cerebral infarction. *Nat Genet*, **39(2)**:212–217. [https://doi.org/10.  
637 1038/ng1945](https://doi.org/10.1038/ng1945)
- 638 Kuhlwilm M, Gronau I, Hubisz MJ, de Filippo C, Prado-Martinez J, Kircher M, Fu Q, Burbano  
639 HA, Lalueza-Fox C, de la Rasilla M, *et al.* (2016). Ancient gene flow from early modern  
640 humans into Eastern Neanderthals. *Nature*, **530(7591)**:429–433. [https://doi.org/10.1038/  
641 nature16544](https://doi.org/10.1038/nature16544)
- 642 Kull M, Filho TS, & Flach P (2017). Beta calibration: a well-founded and easily implemented im-  
643 provement on logistic calibration for binary classifiers. In *Artificial Intelligence and Statistics*,  
644 pp. 623–631
- 645 LeCun Y, Bengio Y, *et al.* (1995). Convolutional networks for images, speech, and time series.  
646 *The handbook of brain theory and neural networks*, **3361(10)**:1995
- 647 Li H (2011). A statistical framework for SNP calling, mutation discovery, association map-  
648 ping and population genetical parameter estimation from sequencing data. *Bioinformatics*,  
649 **27(21)**:2987–2993. <https://doi.org/10.1093/bioinformatics/btr509>

- 650 Mahdi T, Hänzelmann S, Salehi A, Muhammed SJ, Reinbothe TM, Tang Y, Axelsson AS, Zhou  
651 Y, Jing X, Almgren P, *et al.* (2012). Secreted frizzled-related protein 4 reduces insulin secretion  
652 and is overexpressed in type 2 diabetes. *Cell Metab*, **16**(5):625–633. [https://doi.org/10.](https://doi.org/10.1016/j.cmet.2012.10.009)  
653 [1016/j.cmet.2012.10.009](https://doi.org/10.1016/j.cmet.2012.10.009)
- 654 Malaspinas AS, Westaway MC, Muller C, Sousa VC, Lao O, Alves I, Bergström A, Athanasiadis  
655 G, Cheng JY, Crawford JE, *et al.* (2016). A genomic history of Aboriginal Australia. *Nature*,  
656 **538**(7624):207–214. <https://doi.org/10.1038/nature18299>
- 657 Ménasché G, Pastural E, Feldmann J, Certain S, Ersoy F, Dupuis S, Wulffraat N, Bianchi D,  
658 Fischer A, Le Deist F, *et al.* (2000). Mutations in RAB27A cause Griscelli syndrome associated  
659 with haemophagocytic syndrome. *Nat Genet*, **25**(2):173–176. [https://doi.org/10.1038/](https://doi.org/10.1038/76024)  
660 [76024](https://doi.org/10.1038/76024)
- 661 Meyer M, Kircher M, Gansauge MT, Li H, Racimo F, Mallick S, Schraiber JG, Jay F, Prüfer  
662 K, Filippo Cd, *et al.* (2012). A high-coverage genome sequence from an archaic Denisovan  
663 individual. *Science*, **338**(6104):222–226. <https://doi.org/10.1126/science.1224344>
- 664 Miao B, Wang Z, & Li Y (2016). Genomic analysis reveals hypoxia adaptation in the Tibetan  
665 mastiff by introgression of the gray wolf from the Tibetan plateau. *Mol Biol Evol*, **34**(3):734–  
666 743. <https://doi.org/10.1093/molbev/msw274>
- 667 Mondal M, Bertranpetit J, & Lao O (2019). Approximate Bayesian computation with deep  
668 learning supports a third archaic introgression in Asia and Oceania. *Nat Commun*, **10**(1):246.  
669 <https://doi.org/10.1038/s41467-018-08089-7>
- 670 Morison IM, Bordé EMC, Cheesman EJ, Cheong PL, Holyoake AJ, Fichelson S, Weeks RJ, Lo  
671 A, Davies SM, Wilbanks SM, *et al.* (2008). A mutation of human cytochrome c enhances the  
672 intrinsic apoptotic pathway but causes only thrombocytopenia. *Nat Genet*, **40**(4):387–389.  
673 <https://doi.org/10.1038/ng.103>
- 674 Norris LC, Main BJ, Lee Y, Collier TC, Fofana A, Cornel AJ, & Lanzaro GC (2015). Adaptive  
675 introgression in an African malaria mosquito coincident with the increased usage of insecticide-  
676 treated bed nets. *Proc Natl Acad Sci U S A*, **112**(3):815–820. [https://doi.org/10.1073/](https://doi.org/10.1073/pnas.1418892112)  
677 [pnas.1418892112](https://doi.org/10.1073/pnas.1418892112)
- 678 Pardo-Diaz C, Salazar C, Baxter SW, Merot C, Figueiredo-Ready W, Joron M, McMillan WO, &  
679 Jiggins CD (2012). Adaptive introgression across species boundaries in heliconius butterflies.  
680 *PLoS Genet*, **8**(6):e1002752. <https://doi.org/10.1371/journal.pgen.1002752>
- 681 Prüfer K, Filippo Cd, Grote S, Mafessoni F, Korlević P, Hajdinjak M, Vernot B, Skov L, Hsieh P,  
682 Peyrégne S, *et al.* (2017). A high-coverage Neandertal genome from Vindija Cave in Croatia.  
683 *Science*, **358**(6363):655–658. <https://doi.org/10.1126/science.aao1887>
- 684 Prüfer K, Racimo F, Patterson N, Jay F, Sankararaman S, Sawyer S, Heinze A, Renaud G,  
685 Sudmant PH, de Filippo C, *et al.* (2014). The complete genome sequence of a Neandertal from  
686 the Altai Mountains. *Nature*, **505**(7481):43–49. <https://doi.org/10.1038/nature12886>
- 687 Racimo F, Gokhman D, Fumagalli M, Ko A, Hansen T, Moltke I, Albrechtsen A, Carmel L,  
688 Huerta-Sánchez E, & Nielsen R (2017a). Archaic adaptive introgression in TBX15/WARS2.  
689 *Mol Biol Evol*, **34**(3):509–524. <https://doi.org/10.1093/molbev/msw283>



- 690 Racimo F, Marnetto D, & Huerta-Sánchez E (2017b). Signatures of archaic adaptive introgression  
691 in present-day human populations. *Mol Biol Evol*, **34**(2):296–317. <https://doi.org/10.1093/molbev/msw216>  
692
- 693 Racimo F, Sankararaman S, Nielsen R, & Huerta-Sánchez E (2015). Evidence for archaic adaptive  
694 introgression in humans. *Nat Rev Genet*, **16**(6):359. <https://doi.org/10.1038/nrg3936>
- 695 Ragsdale AP & Gravel S (2019). Models of archaic admixture and recent history from two-locus  
696 statistics. *bioRxiv*, p. 489401. <https://doi.org/10.1101/489401>
- 697 Reich D, Green RE, Kircher M, Krause J, Patterson N, Durand EY, Viola B, Briggs AW, Stenzel  
698 U, Johnson PL, *et al.* (2010). Genetic history of an archaic hominin group from Denisova Cave  
699 in Siberia. *Nature*, **468**(7327):1053. <https://doi.org/10.1038/nature09710>
- 700 Sanchez T, Cury J, Charpiat G, & Jay F (2020). Deep learning for population size history infer-  
701 ence: design, comparison and combination with approximate Bayesian computation. *bioRxiv*,  
702 p. 2020.01.20.910539. <https://doi.org/10.1101/2020.01.20.910539>
- 703 Sankararaman S, Mallick S, Dannemann M, Prüfer K, Kelso J, Pääbo S, Patterson N, & Reich  
704 D (2014). The genomic landscape of Neanderthal ancestry in present-day humans. *Nature*,  
705 **507**(7492):354–357. <https://doi.org/10.1038/nature12961>
- 706 Sankararaman S, Mallick S, Patterson N, & Reich D (2016). The combined landscape of Denisov-  
707 an and Neanderthal ancestry in present-day humans. *Current Biology*, **26**(9):1241–1247.  
708 <https://doi.org/10.1016/j.cub.2016.03.037>
- 709 Schrider DR & Kern AD (2018). Supervised machine learning for population genetics: a new  
710 paradigm. *Trends in Genetics*, **34**(4):301–312. <https://doi.org/10.1016/j.tig.2017.12.005>  
711
- 712 Scott TM, Guo H, Eichler EE, Rosenfeld JA, Pang K, Liu Z, Lalani S, Bi W, Yang Y, Bacino  
713 CA, *et al.* (2020). BAZ2B haploinsufficiency as a cause of developmental delay, intellectual  
714 disability, and autism spectrum disorder. *Hum Mutat*, **41**(5):921–925. <https://doi.org/10.1002/humu.23992>  
715
- 716 Setter D, Mousset S, Cheng X, Nielsen R, DeGiorgio M, & Hermisson J (2020). VolcanoFinder:  
717 genomic scans for adaptive introgression. *PLoS Genet*, **16**(6):e1008867. <https://doi.org/10.1371/journal.pgen.1008867>  
718
- 719 Sheehan S & Song YS (2016). Deep learning for population genetic inference. *PLoS Comput  
720 Biol*, **12**(3):e1004845. <https://doi.org/10.1371/journal.pcbi.1004845>
- 721 Simonyan K, Vedaldi A, & Zisserman A (2014). Deep inside convolutional networks: visualising  
722 image classification models and saliency maps. *arXiv:1312.6034 [cs]*. ArXiv: 1312.6034
- 723 Simsek Kiper PO, Saito H, Gori F, Unger S, Hesse E, Yamana K, Kiviranta R, Solban N, Liu J,  
724 Brommage R, *et al.* (2016). Cortical-bone fragility—insights from sFRP4 deficiency in Pyle’s  
725 disease. *New England Journal of Medicine*, **374**(26):2553–2562. <https://doi.org/10.1056/NEJMoa1509342>  
726
- 727 Speidel L, Forest M, Shi S, & Myers SR (2019). A method for genome-wide genealogy esti-  
728 mation for thousands of samples. *Nat Genet*, **51**(9):1321–1329. <https://doi.org/10.1038/s41588-019-0484-x>  
729

- 730 Springenberg JT, Dosovitskiy A, Brox T, & Riedmiller M (2015). Striving for simplicity: the all  
731 convolutional net. *arXiv:1412.6806 [cs]*. ArXiv: 1412.6806
- 732 Steinrücken M, Spence JP, Kamm JA, Wiczorek E, & Song YS (2018). Model-based detection  
733 and analysis of introgressed Neanderthal ancestry in modern humans. *Mol Ecol*, **27(19)**:3873–  
734 3888. <https://doi.org/10.1111/mec.14565>
- 735 Suarez-Gonzalez A, Hefer CA, Christe C, Corea O, Lexer C, Cronk QC, & Douglas CJ (2016).  
736 Genomic and functional approaches reveal a case of adaptive introgression from populus bal-  
737 samifera (balsam poplar) in *P. átrichocarpa* (black cottonwood). *Mol Ecol*, **25(11)**:2427–2442.  
738 <https://doi.org/10.1111/mec.13539>
- 739 The 1000 Genomes Project Consortium (2015). A global reference for human genetic variation.  
740 *Nature*, **526(7571)**:68–74. <https://doi.org/10.1038/nature15393>
- 741 Tian X, Browning BL, & Browning SR (2019). Estimating the genome-wide mutation rate with  
742 three-way identity by descent. *The American Journal of Human Genetics*, **105(5)**:883–893.  
743 <https://doi.org/10.1016/j.ajhg.2019.09.012>
- 744 Torada L, Lorenzon L, Beddis A, Isildak U, Pattini L, Mathieson S, & Fumagalli M (2019).  
745 ImaGene: a convolutional neural network to quantify natural selection from genomic data.  
746 *BMC Bioinformatics*, **20(9)**:337. <https://doi.org/10.1186/s12859-019-2927-x>
- 747 Turner R, Hung J, Frank E, Saatci Y, & Yosinski J (2019). Metropolis-Hastings generative  
748 adversarial networks. *arXiv:1811.11357 [cs, stat]*. ArXiv: 1811.11357
- 749 Uchiyama Y, Yanagisawa K, Kunishima S, Shiina M, Ogawa Y, Nakashima M, Hirato J, Imagawa  
750 E, Fujita A, Hamanaka K, *et al.* (2018). A novel CYCS mutation in the  $\alpha$ -helix of the CYCS C-  
751 terminal domain causes non-syndromic thrombocytopenia. *Clin Genet*, **94(6)**:548–553. <https://doi.org/10.1111/cge.13423>
- 752
- 753 Veeramah KR, Johnstone L, Karafet TM, Wolf D, Sprissler R, Salogiannis J, Barth-Maron  
754 A, Greenberg ME, Stuhlmann T, Weinert S, *et al.* (2013). Exome sequencing reveals new  
755 causal mutations in children with epileptic encephalopathies. *Epilepsia*, **54(7)**:1270–1281.  
756 <https://doi.org/10.1111/epi.12201>
- 757 Vernot B & Akey JM (2014). Resurrecting surviving Neandertal lineages from modern human  
758 genomes. *Science*, **343(6174)**:1017–1021. <https://doi.org/10.1126/science.1245938>
- 759 Vernot B, Tucci S, Kelso J, Schraiber JG, Wolf AB, Gittelman RM, Dannemann M, Grote  
760 S, McCoy RC, Norton H, *et al.* (2016). Excavating Neandertal and Denisovan DNA from  
761 the genomes of Melanesian individuals. *Science*, **352(6282)**:235–239. <https://doi.org/10.1126/science.aad9416>
- 762
- 763 Villanea FA & Schraiber JG (2019). Multiple episodes of interbreeding between Neanderthal and  
764 modern humans. *Nat Ecol Evol*, **3(1)**:39. <https://doi.org/10.1038/s41559-018-0735-8>
- 765 Wang Z, Wang J, Kourakos M, Hoang N, Lee HH, Mathieson I, & Mathieson S (2020). Automatic  
766 inference of demographic parameters using generative adversarial networks. *bioRxiv*. <https://doi.org/10.1101/2020.08.05.237834>
- 767
- 768 Whitney KD, Randell RA, & Rieseberg LH (2006). Adaptive introgression of herbivore resistance  
769 traits in the weedy sunflower *Helianthus annuus*. *Am Nat*, **167(6)**:794–807. <https://doi.org/10.1086/504606>
- 770

- 771 Yang XH & Huang S (1999). PFM1 (PRDM4), a new member of the PR-domain family, maps  
772 to a tumor suppressor locus on human chromosome 12q23–q24.1. *Genomics*, **61(3)**:319–325.  
773 <https://doi.org/10.1006/geno.1999.5967>
- 774 Yoon J, Jordon J, & van der Schaar M (2019). INVASE: instance-wise variable selection using  
775 neural networks. In *International Conference on Learning Representations*
- 776 Zammit NW, Siggs OM, Gray PE, Horikawa K, Langley DB, Walters SN, Daley SR, Loetsch  
777 C, Warren J, Yap JY, *et al.* (2019). Denisovan, modern human and mouse TNFAIP3 alleles  
778 tune A20 phosphorylation and immunity. *Nat Immunol*, **20(10)**:1299–1310. [https://doi.  
779 org/10.1038/s41590-019-0492-0](https://doi.org/10.1038/s41590-019-0492-0)
- 780 Zarr Development Team (2020). Zarr version 2.4.0. [https://zarr.readthedocs.io/en/  
781 stable/](https://zarr.readthedocs.io/en/stable/)
- 782 Zhang X, Kim B, Lohmueller KE, & Huerta-Sánchez E (2020). The impact of recessive deleterious  
783 variation on signals of adaptive introgression in human populations. *Genetics*, **215(3)**:799–812.  
784 <https://doi.org/10.1534/genetics.120.303081>

## 785 Tables

Table 1: Top ranking gene candidates corresponding to Neanderthal AI in Europeans. We show genes which overlap, or are within 100 kbp of, the 30 highest ranked 100 kbp intervals. Adjacent intervals have been merged. The CNN was trained using only AI simulations with selected mutation having allele frequency  $> 0.25$ , and subsequently calibrated with resampled neutral:sweep:AI ratios of 1:0.1:0.02.

| chrom | start     | end       | genes                                                                                                                            |
|-------|-----------|-----------|----------------------------------------------------------------------------------------------------------------------------------|
| 1     | 104500001 | 104600000 |                                                                                                                                  |
| 2     | 109360001 | 109460000 | LIMS1; RANBP2; CCDC138; EDAR                                                                                                     |
| 2     | 160160001 | 160280000 | TANC1; WDSUB1; BAZ2B                                                                                                             |
| 3     | 114480001 | 114620000 | ZBTB20                                                                                                                           |
| 4     | 54240001  | 54340000  | SCFD2; FIP1L1; LNX1                                                                                                              |
| 5     | 39220001  | 39320000  | FYB; C9; DAB2                                                                                                                    |
| 6     | 28180001  | 28320000  | ZSCAN16-AS1; ZSCAN16; ZKSCAN8; ZSCAN9; ZKSCAN4; NKAPL; PGBD1; ZSCAN31; ZKSCAN3; ZSCAN12; ZSCAN23                                 |
| 8     | 143440001 | 143560000 | TSNARE1; BAI1                                                                                                                    |
| 9     | 16700001  | 16820000  | BNC2                                                                                                                             |
| 12    | 85780001  | 85880000  | ALX1                                                                                                                             |
| 19    | 20220001  | 20380000  | ZNF682; ZNF90; ZNF486                                                                                                            |
| 19    | 33580001  | 33740000  | RHPN2; GPATCH1; WDR88; LRP3; SLC7A10                                                                                             |
| 20    | 62100001  | 62280000  | CHRNA4; KCNQ2; EEF1A2; PDPF; PTK6; SRMS; C20orf195; HELZ2; GMEB2; STMN3; RTEL1; TNFRSF6B; ARFRP1; ZGPAT; LIME1; SLC2A4RG; ZBTB46 |
| 21    | 25840001  | 25940000  |                                                                                                                                  |

Table 2: Top ranking gene candidates corresponding to Denisovan AI in Melanesians. We show genes which overlap, or are within 100 kbp of, the 30 highest ranked 100 kbp intervals. Adjacent intervals have been merged. The CNN was trained using only AI simulations with selected mutation having allele frequency  $> 0.25$ , and subsequently calibrated with resampled neutral:sweep:AI ratios of 1:0.1:0.02.

| chrom | start     | end       | genes                                                   |
|-------|-----------|-----------|---------------------------------------------------------|
| 2     | 129960001 | 130060000 |                                                         |
| 3     | 3740001   | 3840000   | SUMF1; LRRN1                                            |
| 4     | 41980001  | 42080000  | TMEM33; DCAF4L1; SLC30A9; BEND4                         |
| 5     | 420001    | 520000    | PDCD6; AHR; C5orf55; EXOC3; CTD-2228K2.5; SLC9A3; CEP72 |
| 6     | 74640001  | 74740000  |                                                         |
| 6     | 81960001  | 82060000  |                                                         |
| 6     | 137920001 | 138120000 | TNFAIP3                                                 |
| 7     | 25100001  | 25200000  | OSBPL3; CYCS; C7orf31; NPVF                             |
| 7     | 38020001  | 38120000  | EPDR1; NME8; SFRP4; STARD3NL                            |
| 7     | 121160001 | 121260000 |                                                         |
| 8     | 3040001   | 3140000   | CSMD1                                                   |
| 12    | 84640001  | 84740000  |                                                         |
| 12    | 108240001 | 108340000 | PRDM4; ASCL4                                            |
| 12    | 114020001 | 114280000 | RBM19                                                   |
| 14    | 61860001  | 61960000  | PRKCH                                                   |
| 14    | 63120001  | 63220000  | KCNH5                                                   |
| 14    | 96700001  | 96820000  | BDKRB2; BDKRB1; ATG2B; GSKIP; AK7                       |
| 15    | 55260001  | 55400000  | RSL24D1; RAB27A                                         |
| 16    | 62600001  | 62700000  |                                                         |
| 16    | 78360001  | 78460000  | WVOX                                                    |
| 18    | 22060001  | 22160000  | OSBPL1A; IMPACT; HRH4                                   |
| 22    | 19040001  | 19140000  | DGCR5; DGCR2; DGCR14; TSSK2; GSC2; SLC25A1; CLTCL1      |

## 786 **Figures**

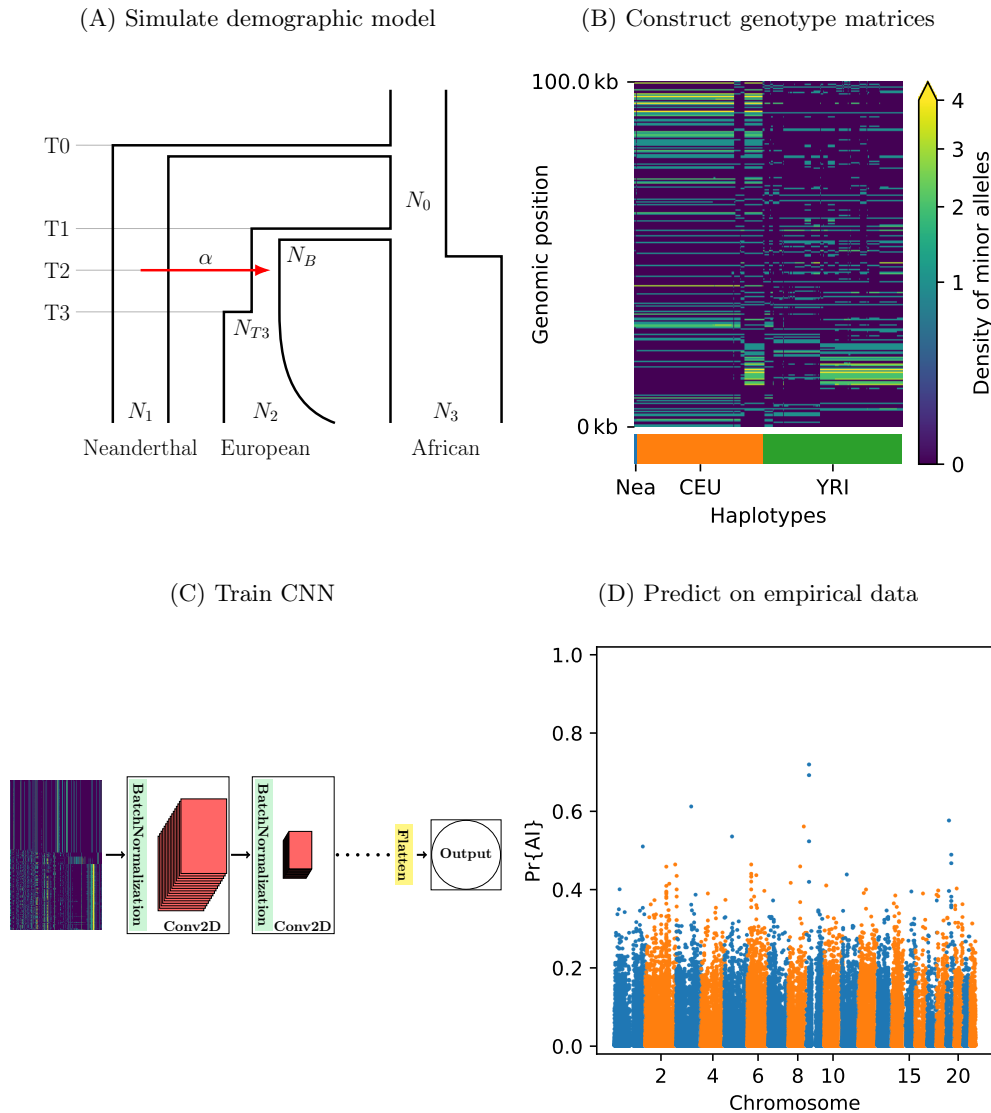

Figure 1: A schematic overview of how **genomatnn** detects adaptive introgression. We first simulate a demographic history, such as the **HomininComposite\_4G20** model shown in Fig. 1A, using the SLiM engine in **stdpopsim**. Parameter values for this model are given in Table S1. Three distinct scenarios are simulated for a given demographic model: neutral mutations only, a sweep in the recipient population, and adaptive introgression. The tree sequence file from each simulation is converted into a genotype matrix for input to the CNN. Fig. 1B shows a genotype matrix from an adaptive introgression simulation, where lighter pixels indicate a higher density of minor alleles, and haplotypes within each population are sorted left-to-right by similarity to the donor population (Nea). In this example, haplotype diversity is low in the recipient population (CEU), which closely resembles the donor (Nea). Thousands of simulations are produced for each simulation scenario, and their genotype matrices are used to train a binary-classification CNN (Fig. 1C). The CNN is trained to output  $\Pr\{AI\}$ , the probability that the input matrix corresponds to adaptive introgression. Finally, the trained CNN is applied to genotype matrices derived from a VCF/BCF file (Fig. 1D).



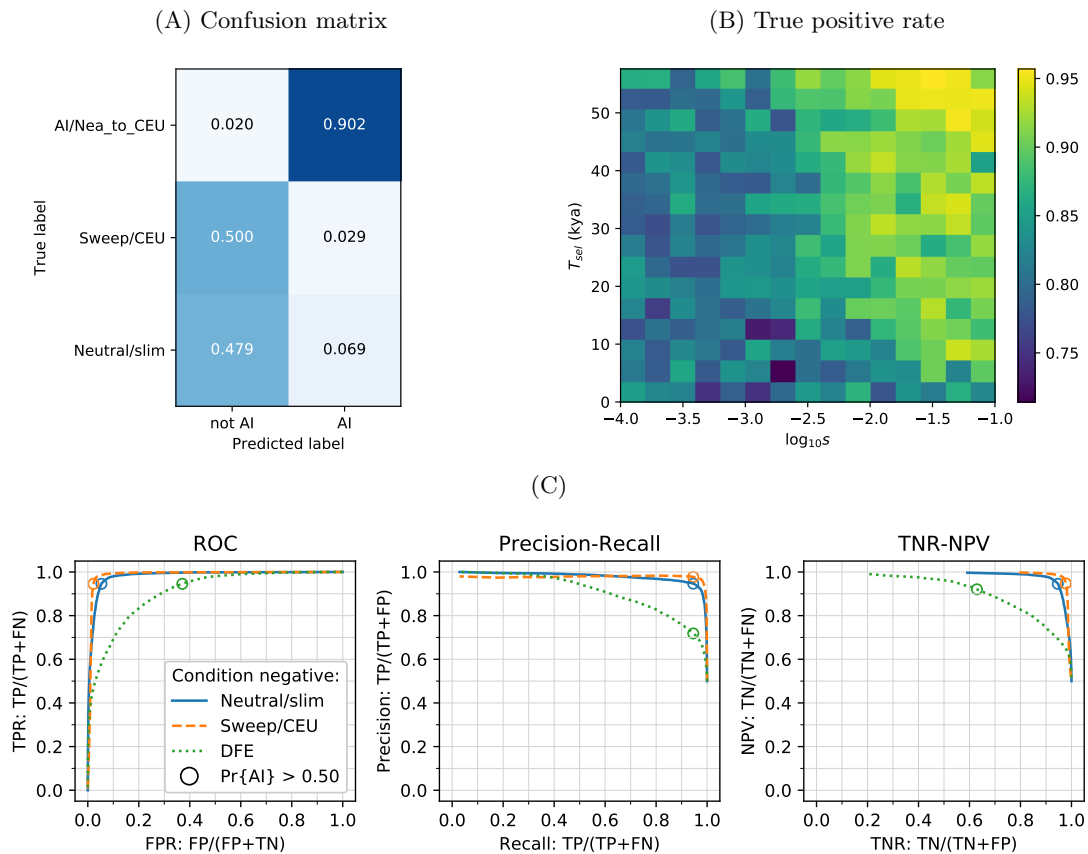

Figure 2: CNN performance on validation simulations for Demographic Model A. The CNN was trained using only AI simulations with selected mutation having allele frequency  $> 0.25$ . **Fig. 2A**: Confusion matrix. For the two prediction categories, either "not AI" or AI, we show the proportion attributed to each of the true (simulated) scenarios. **Fig. 2B**: Average CNN prediction for AI scenarios, binned by selection coefficient,  $s$ , and time of onset of selection  $T_{sel}$ . **Fig. 2C**: ROC curves, precision-recall curves and True Negative Rate vs. Negative Predictive Value (TNR-NPV) curves. The positive condition is AI. The negative conditions are shown using different line styles/colours. The circles indicate the point in ROC-space (respectively Precision-Recall-space, and TNR-NPV-space) when using the threshold  $\Pr\{\text{AI}\} > 0.50$  for classifying a genotype matrix as AI. DFE: distribution of fitness effects. TP: true positives; FP: false positives; TPR: true positive rate; FPR: false positive rate; ROC: Receiver operating characteristics; TNR: true negative rate; TPR: true positive rate.

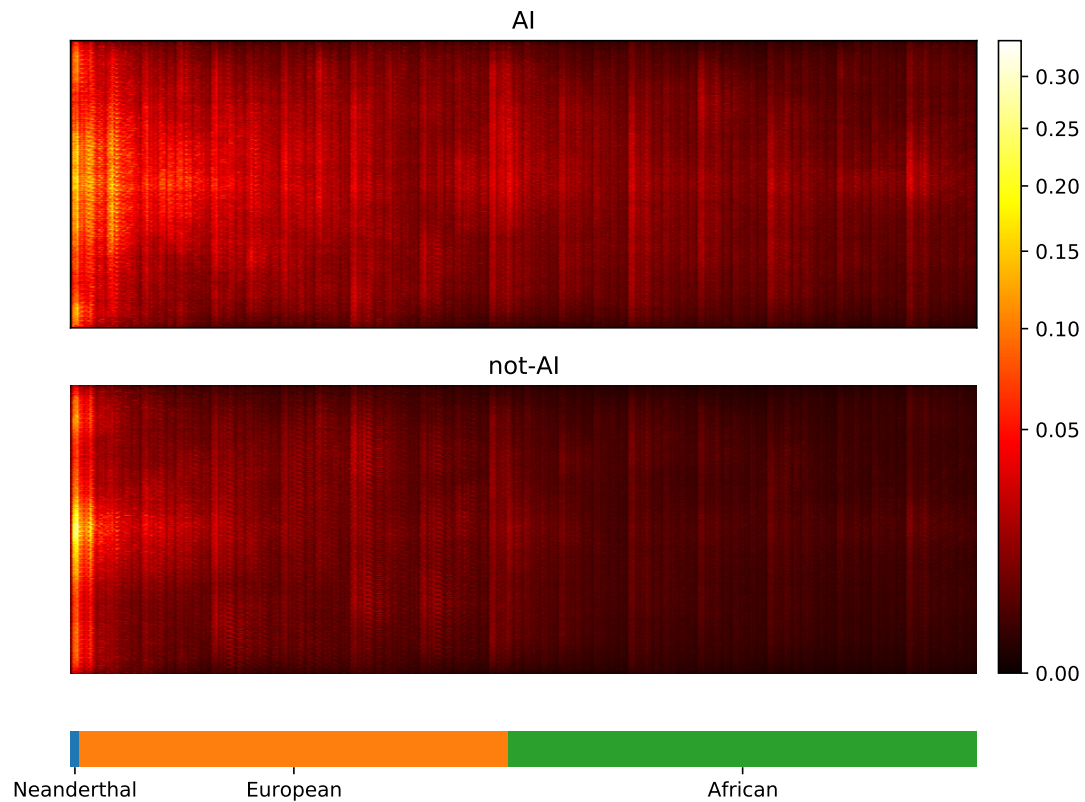

Figure 3: Saliency maps, showing the CNN's attention across the input matrices for AI and not-AI inputs, calculated for the CNN trained on Demographic Model A, filtered for beneficial allele frequency  $> 0.25$ . Each panel shows the average gradient over input matrices encoding AI (top) or not-AI (bottom). Brighter colours indicate larger gradients, where small changes in the genotype matrix have a relatively larger influence over the CNN's prediction. Columns in the input matrix correspond to haplotypes from the populations labelled at the bottom.

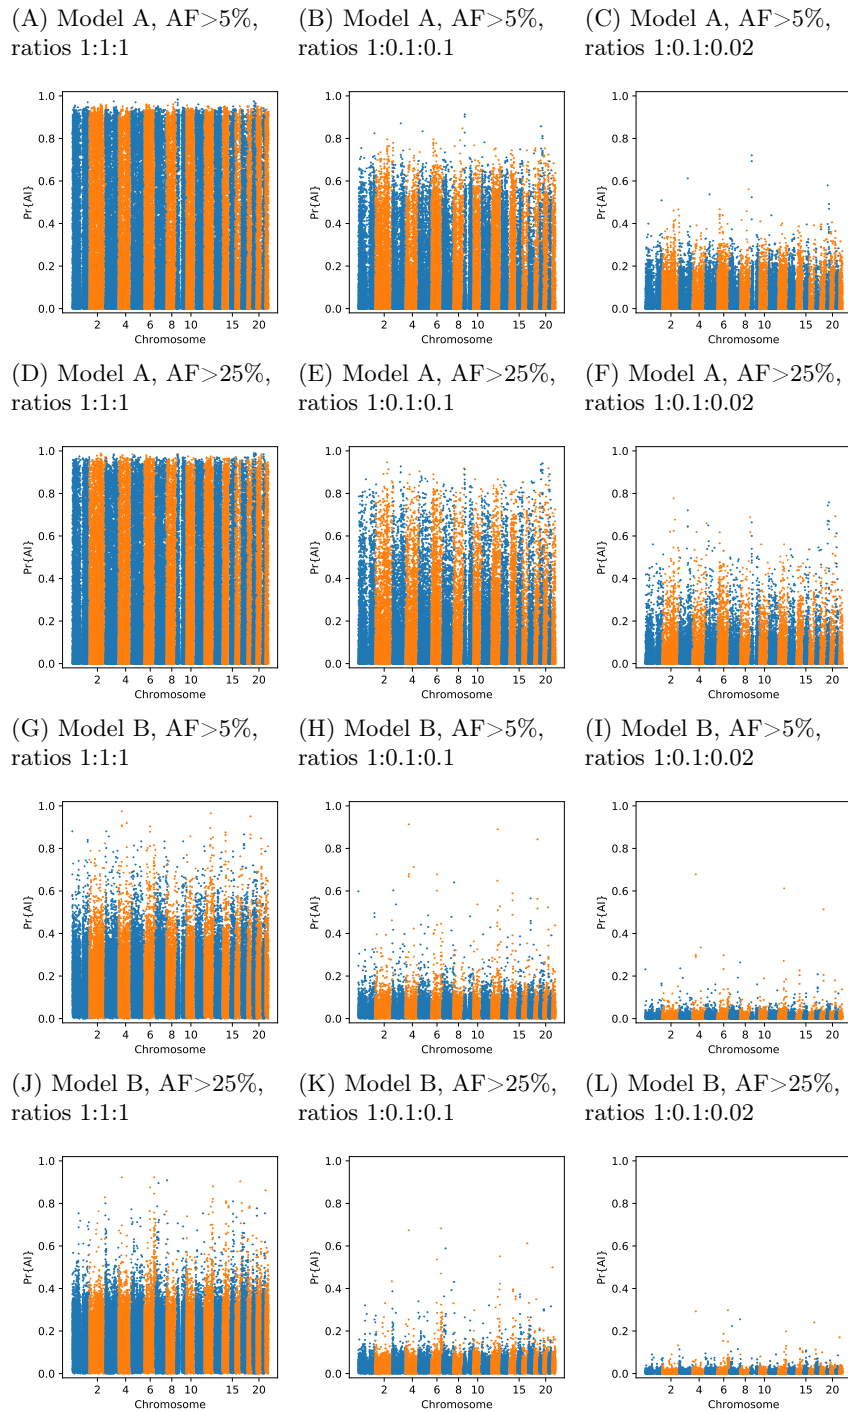

Figure 4: Comparison of Manhattan plots using beta-calibrated output probabilities for different class ratios. Each row indicates a single CNN, with equivalent data filtering. Each column indicates a different ratio of scenarios used for calibration. AF = Minimum beneficial allele frequency.

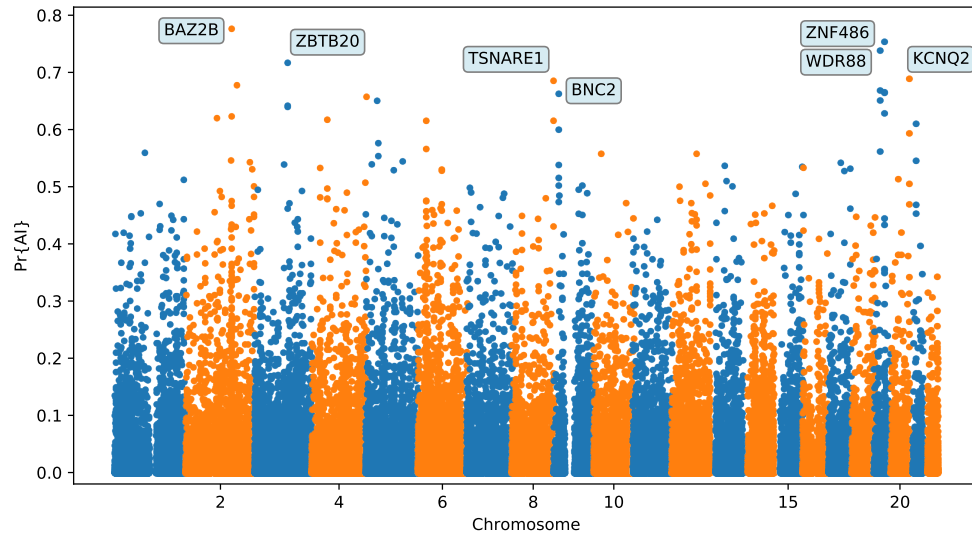

Figure 5: Application of the trained CNN to the Vindija and Altai Neanderthals, and 1000 genomes populations YRI and CEU. The CNN was applied to overlapping 100 kbp windows, moving along the chromosome in steps of size 20 kbp. The CNN was trained using only AI simulations with selected mutation having allele frequency  $> 25\%$ , and subsequently calibrated with resampled neutral:sweep:AI ratios of 1:0.1:0.02.

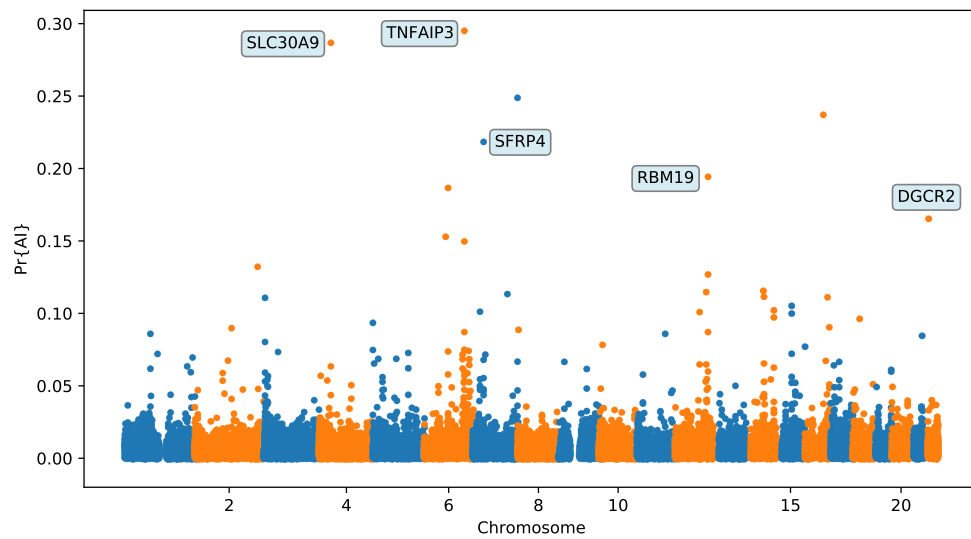

Figure 6: Application of the trained CNN to the Altai Denisovan and Altai Neanderthal, 1000 genomes YRI populations, and IGDP Melanesians. The CNN was applied to overlapping 100 kbp windows, moving along the chromosome in steps of size 20 kbp. The CNN was trained using only AI simulations with selected mutation having allele frequency  $> 25\%$ , and subsequently calibrated with resampled neutral:sweep:AI ratios of 1:0.1:0.02.

## 787 Supplementary Tables

Table S1: Parameter values used for simulating the HomininComposite\_4G20 demographic model, with parameters corresponding to Fig. 1A.

| Parameter            | Description               | Value                               | Units                  | Source                        |
|----------------------|---------------------------|-------------------------------------|------------------------|-------------------------------|
| $N_0$                | ancestral pop. size       | 18500                               |                        | Kuhlwilm <i>et al.</i> (2016) |
| $N_1$                | Neanderthal pop. size     | 3400                                |                        | Kuhlwilm <i>et al.</i> (2016) |
| $N_2$                | European pop. size        | 13377                               |                        | $N_{T_3} \exp(1000 r T_3/g)$  |
| $N_3$                | African pop. size         | 27600                               |                        | Kuhlwilm <i>et al.</i> (2016) |
| $N_B$                | bottleneck pop. size      | 1080                                |                        | Ragsdale & Gravel (2019)      |
| $N_{T_3}$            |                           | 1450                                |                        | Ragsdale & Gravel (2019)      |
| $r$                  | exp rate                  | 0.00202                             |                        | Ragsdale & Gravel (2019)      |
| $T_0$                | archaic split time        | 550                                 | kya                    | Prüfer <i>et al.</i> (2017)   |
| $T_1$                | Afr-Eur split time        | 65.7                                | kya                    | Ragsdale & Gravel (2019)      |
| $T_2$                | time of gene flow         | 55                                  | kya                    | Prüfer <i>et al.</i> (2017)   |
| $T_3$                | time at end of bottleneck | 31.9                                | kya                    | Ragsdale & Gravel (2019)      |
| $g$                  | generation time           | 29                                  | years                  | Prüfer <i>et al.</i> (2017)   |
| $\alpha$             | migration rate            | 2.25                                | %                      | Prüfer <i>et al.</i> (2017)   |
| $T_{\text{Altai}}$   | sampling time             | 115                                 | kya                    | Prüfer <i>et al.</i> (2017)   |
| $T_{\text{Vindija}}$ | sampling time             | 55                                  | kya                    | Prüfer <i>et al.</i> (2017)   |
| $n_{\text{Nea}}$     | sample size               | 2                                   | diploid<br>individuals |                               |
| $n_{\text{Afr}}$     | sample size               | 108                                 | diploid<br>individuals |                               |
| $n_{\text{Eur}}$     | sample size               | 99                                  | diploid<br>individuals |                               |
| $s$                  | selection coefficient     | $10^{**}(\text{Unif}(-4,-1))$       |                        |                               |
| $T_{\text{sel1}}$    | selection onset (sweep)   | $\text{Unif}(1, T_1)$               | kya                    |                               |
| $T_{\text{mut1}}$    | mutation (sweep)          | $\text{Unif}(T_{\text{sel1}}, T_1)$ | kya                    |                               |
| $T_{\text{sel2}}$    | selection onset (AI)      | $\text{Unif}(1, T_2)$               | kya                    |                               |
| $T_{\text{mut2}}$    | mutation (AI)             | $\text{Unif}(T_2, T_0)$             | kya                    |                               |

Table S2: Top ranking gene candidates corresponding to Neanderthal AI in Europeans. We show genes which overlap, or are within 100 kbp of, the 30 highest ranked 100 kbp intervals. Adjacent intervals have been merged. The CNN was trained using only AI simulations with selected mutation having allele frequency  $> 5\%$ , and subsequently calibrated with resampled neutral:sweep:AI ratios of 1:0.1:0.02.

| chrom | start     | end       | genes                                                                                                  |
|-------|-----------|-----------|--------------------------------------------------------------------------------------------------------|
| 1     | 39420001  | 39520000  | RRAGC; MYCBP; GJA9; RHBDL2; AKIRIN1; NDUFS5; MACF1                                                     |
| 2     | 159880001 | 160280000 | TANC1; WDSUB1; BAZ2B                                                                                   |
| 2     | 180060001 | 180160000 | SESTD1                                                                                                 |
| 2     | 227800001 | 227900000 | RHBDD1; COL4A4                                                                                         |
| 2     | 238820001 | 238960000 | LRRFIP1; RBM44; RAMP1; UBE2F; SCLY; ESPNL; KLHL30                                                      |
| 3     | 114500001 | 114600000 | ZBTB20                                                                                                 |
| 5     | 57960001  | 58060000  | RAB3C                                                                                                  |
| 6     | 28160001  | 28380000  | ZSCAN16-AS1; ZSCAN16; ZKSCAN8; ZSCAN9; ZKSCAN4; NKAPL; PGBD1; ZSCAN31; ZKSCAN3; ZSCAN12; ZSCAN23; GPX6 |
| 8     | 17060001  | 17160000  | MICU3; ZDHHC2; CNOT7; VPS37A; MTMR7                                                                    |
| 8     | 91840001  | 91940000  | TMEM64; NECAB1; TMEM55A                                                                                |
| 9     | 16700001  | 16860000  | BNC2                                                                                                   |
| 10    | 11800001  | 11900000  | ECHDC3; PROSER2; UPF2                                                                                  |
| 11    | 37740001  | 37840000  |                                                                                                        |
| 19    | 20260001  | 20360000  | ZNF90; ZNF486                                                                                          |
| 19    | 33580001  | 33700000  | RHPN2; GPATCH1; WDR88; LRP3; SLC7A10                                                                   |
| 20    | 14340001  | 14440000  | MACROD2; FLRT3                                                                                         |

Table S3: Top ranking gene candidates corresponding to Denisovan AI in Melanesians. We show genes which overlap, or are within 100 kbp of, the 30 highest ranked 100 kbp intervals. Adjacent intervals have been merged. The CNN was trained using only AI simulations with selected mutation having allele frequency  $> 5\%$ , and subsequently calibrated with resampled neutral:sweep:AI ratios of 1:0.1:0.02.

| chrom | start     | end       | genes                             |
|-------|-----------|-----------|-----------------------------------|
| 1     | 2880001   | 2980000   | ACTRT2; LINC00982; PRDM16         |
| 1     | 220080001 | 220180000 | SLC30A10; EPRS; BPNT1; IARS2      |
| 2     | 221040001 | 221140000 |                                   |
| 3     | 15400001  | 15500000  | SH3BP5; METTL6; EAF1; COLQ        |
| 4     | 41960001  | 42100000  | TMEM33; DCAF4L1; SLC30A9; BEND4   |
| 5     | 135440001 | 135540000 | TGFBI; SMAD5-AS1; SMAD5; TRPC7    |
| 6     | 81980001  | 82120000  | FAM46A                            |
| 7     | 121160001 | 121260000 |                                   |
| 9     | 95500001  | 95600000  | IPPK; BICD2; ZNF484               |
| 10    | 59660001  | 59760000  |                                   |
| 12    | 80780001  | 80880000  | OTOGL; PTPRQ                      |
| 12    | 84620001  | 84740000  |                                   |
| 14    | 57620001  | 57760000  | EXOC5; AP5M1; NAA30               |
| 17    | 29480001  | 29720000  | NF1; OMG; EVI2B; EVI2A; RAB11FIP4 |
| 18    | 38180001  | 38320000  |                                   |
| 20    | 54340001  | 54440000  |                                   |

Table S4: Loss and accuracy for CNNs after training for three epochs, as reported by Keras/Tensorflow, for the training and validation datasets. Binary cross-entropy was used for the loss function.

| Demographic Model | Hyperparameters   | Training |          | Validation |          |
|-------------------|-------------------|----------|----------|------------|----------|
|                   |                   | Loss     | Accuracy | Loss       | Accuracy |
| A                 | AF>0.05           | 0.1592   | 0.9458   | 0.1618     | 0.9468   |
| A                 | AF>0.25           | 0.1224   | 0.9585   | 0.1265     | 0.9578   |
| A                 | AF>0.25; unphased | 0.1347   | 0.9537   | 0.1368     | 0.9530   |
| B                 | AF>0.05; unphased | 0.3415   | 0.8439   | 0.3441     | 0.8439   |
| B                 | AF>0.25; unphased | 0.3546   | 0.8372   | 0.3583     | 0.8376   |

## 788 Supplementary Figures



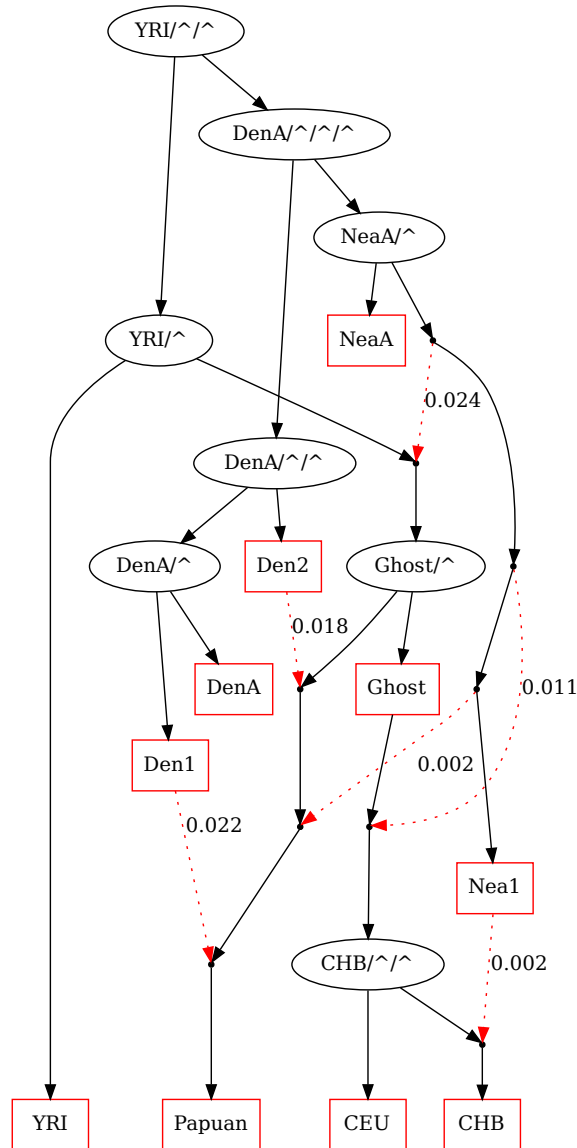

Figure S1: Overview of the [Jacobs \*et al.\* \(2019\)](#) demographic model, featuring two pulses of Denisovan gene flow into Papuans, which we implemented as the `PapuansOutOfAfrica_10J19` model in `stdpopsim`. Black lines show ancestor/descendent relations and red dotted lines show pulses of admixture with the indicated proportion. DenA and NeaA are the sampled populations corresponding to Altai Denisovan and Altai Neanderthal, while Den1, Den2, and Nea1 correspond to introgressing lineages.

(A) ratios 1:1:1

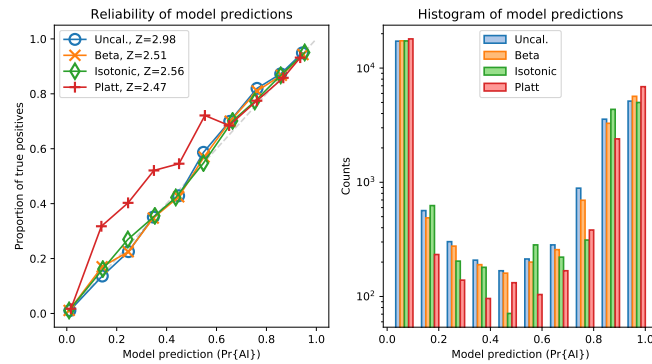

(B) ratios 1:0.1:0.1

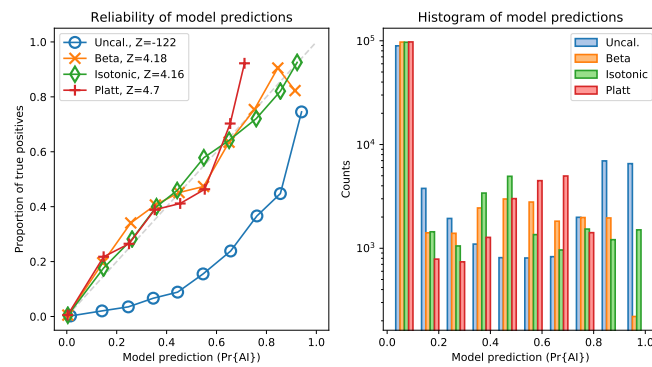

(C) ratios 1:0.1:0.02

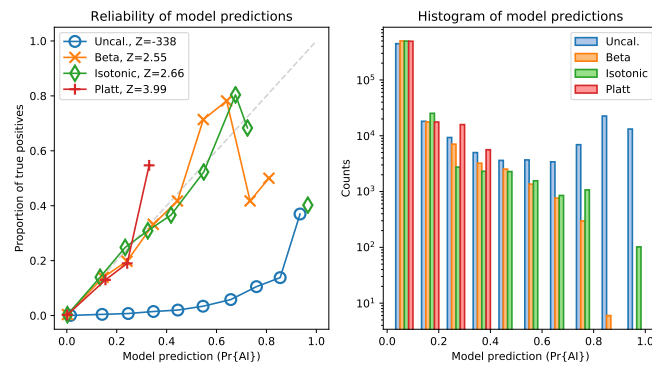

Figure S2: Reliability of probabilities produced by the CNN, for the validation dataset, with and without calibration, for Demographic Model A with a minimum beneficial allele frequency of 5%. The variance-normalised sum of residuals is inset in the upper left corner of each of the reliability plots ( $Z$ ), which for well-calibrated predictions is approximately normally distributed (Turner *et al.*, 2019).

(A) ratios 1:1:1

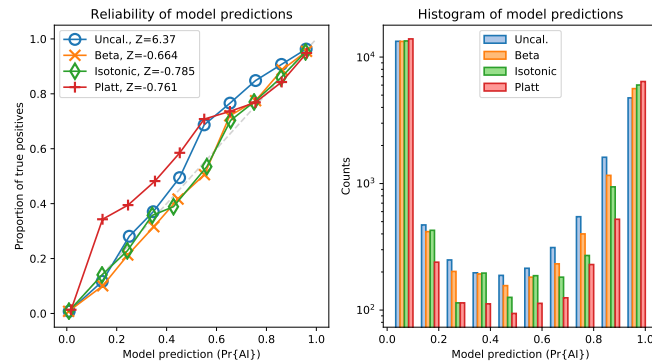

(B) ratios 1:0.1:0.1

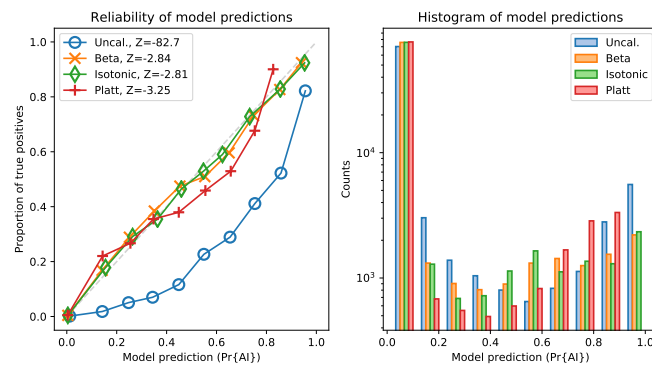

(C) ratios 1:0.1:0.02

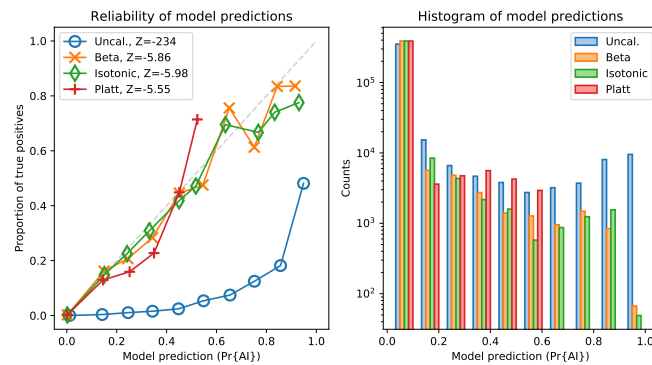

Figure S3: Reliability of probabilities produced by the CNN, for the validation dataset, with and without calibration, for Demographic Model A with a minimum beneficial allele frequency of 25%. The variance-normalised sum of residuals is inset in the upper left corner of each of the reliability plots ( $Z$ ), which for well-calibrated predictions is approximately normally distributed (Turner *et al.*, 2019).

(A) ratios 1:1:1



(B) ratios 1:0.1:0.1



(C) ratios 1:0.1:0.02



Figure S4: Reliability of probabilities produced by the CNN, for the validation dataset, with and without calibration, for Demographic Model B with a minimum beneficial allele frequency of 5%. The variance-normalised sum of residuals is inset in the upper left corner of each of the reliability plots ( $Z$ ), which for well-calibrated predictions is approximately normally distributed (Turner *et al.*, 2019).

(A) ratios 1:1:1

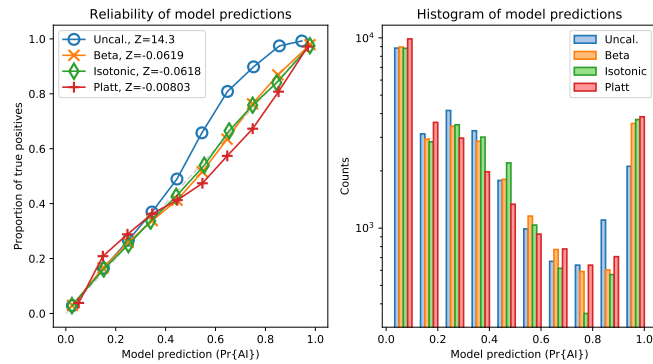

(B) ratios 1:0.1:0.1

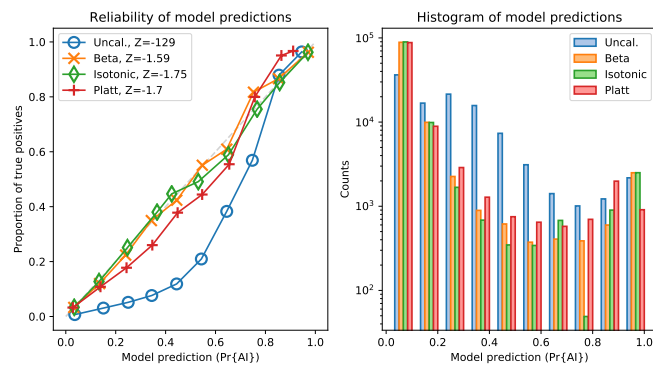

(C) ratios 1:0.1:0.02

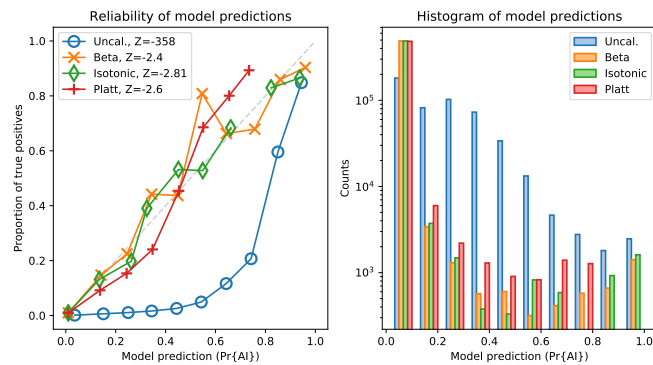

Figure S5: Reliability of probabilities produced by the CNN, for the validation dataset, with and without calibration, for Demographic Model B with a minimum beneficial allele frequency of 25%. The variance-normalised sum of residuals is inset in the upper left corner of each of the reliability plots ( $Z$ ), which for well-calibrated predictions is approximately normally distributed (Turner *et al.*, 2019).

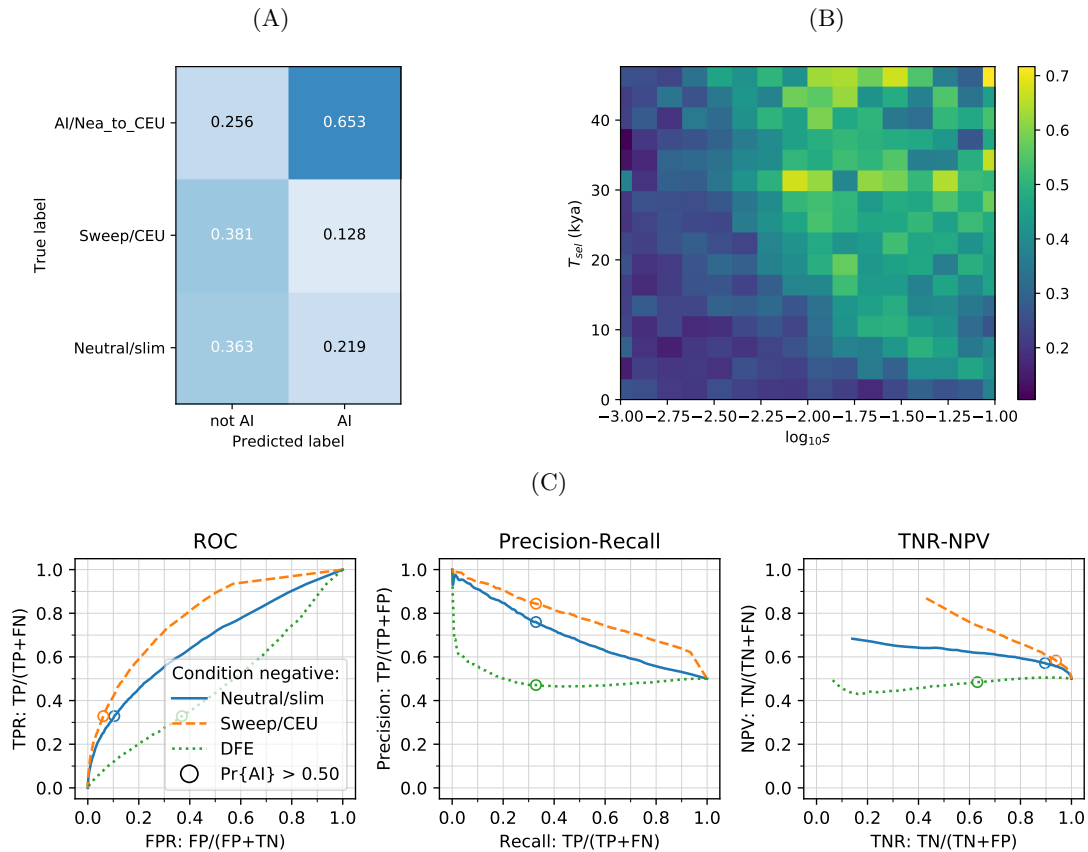

Figure S6: CNN performance on validation simulations for Demographic Model B, after training using Demographic Model A. The CNN was trained using only AI simulations with selected mutation having allele frequency  $> 0.25$ . A) Confusion matrix. For the two prediction categories, either "not AI" or AI, we show the proportion attributed to each of the true (simulated) scenarios. B) Average CNN prediction for AI scenarios, binned by selection coefficient,  $s$ , and time of onset of selection  $T_{sel}$ . C) ROC curves, precision recall curves and True Negative Rate vs. Negative Predictive Value (TNR-NPV) curves. The positive condition is AI. The negative conditions are shown using different line styles/colours. The circles indicate the point in ROC-space (respectively Precision-Recall-space, and TNR-NPV-space) when using the threshold  $\Pr\{AI\} > 0.50$  for classifying a genotype matrix as AI. DFE: distribution of fitness effects. TP: true positives; FP: false positives; TPR: true positive rate; FPR: false positive rate; ROC: Receiver operating characteristics; TNR: true negative rate; TPR: true positive rate.

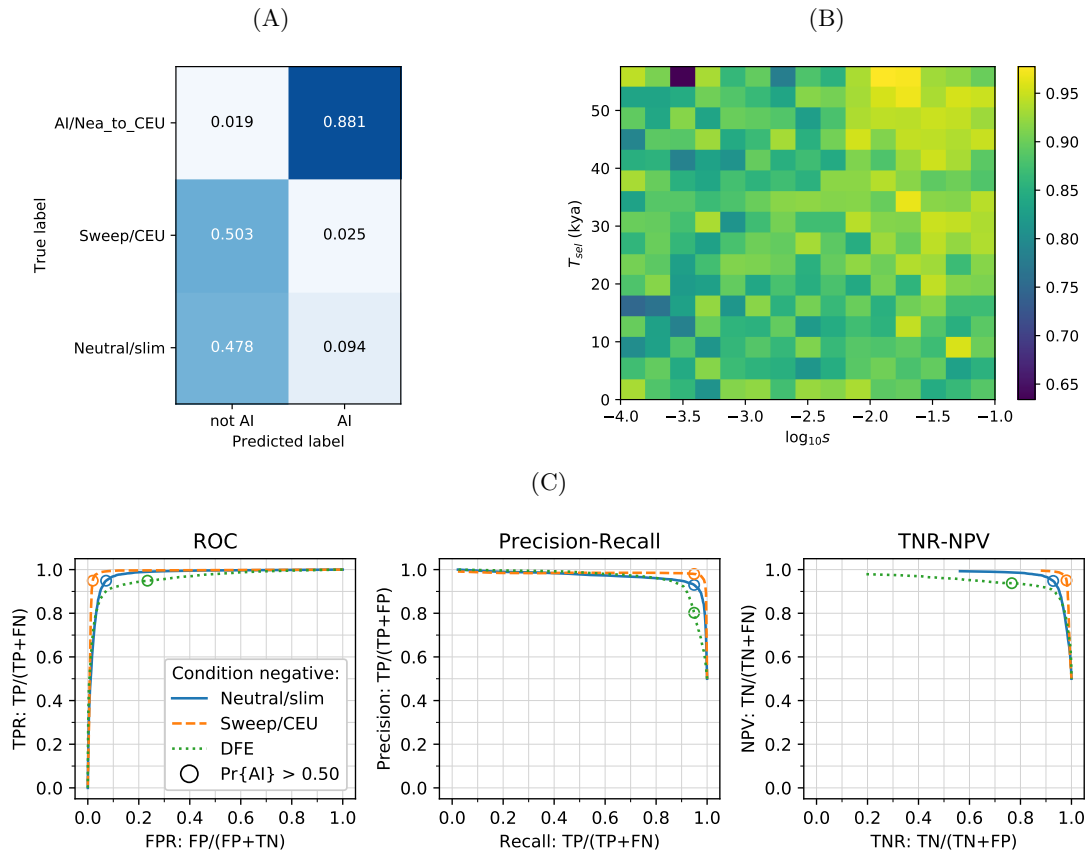

Figure S7: CNN performance on validation simulations for Demographic Model A with unphased data. The CNN was trained using only AI simulations with selected mutation having allele frequency  $> 25\%$ . A) Confusion matrix. For the two prediction categories, either "not AI" or AI, we show the proportion attributed to each of the true (simulated) scenarios. B) Average CNN prediction for AI scenarios, binned by selection coefficient,  $s$ , and time of onset of selection  $T_{sel}$ . C) ROC curves, precision recall curves and True Negative Rate vs. Negative Predictive Value (TNR-NPV) curves. The positive condition is AI. The negative conditions are shown using different line styles/colours. The circles indicate the point in ROC-space (respectively Precision-Recall-space, and TNR-NPV-space) when using the threshold  $\Pr\{AI\} > 0.5$  for classifying a genotype matrix as AI. DFE: distribution of fitness effects. TP: true positives; FP: false positives; TPR: true positive rate; FPR: false positive rate; ROC: Receiver operating characteristics; TNR: true negative rate; TPR: true positive rate.

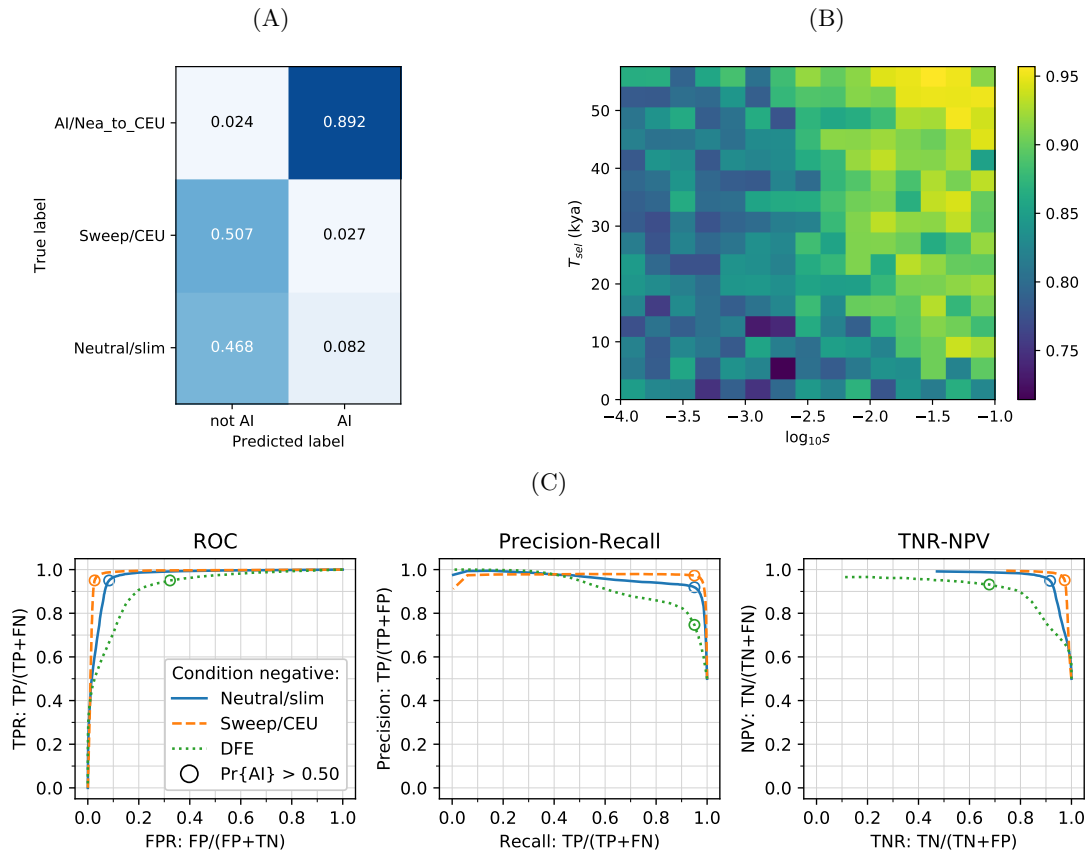

Figure S8: CNN performance on validation simulations for Demographic Model A with phased data. The CNN was trained using only AI simulations with selected mutation having allele frequency  $> 5\%$ . A) Confusion matrix. For the two prediction categories, either "not AI" or AI, we show the proportion attributed to each of the true (simulated) scenarios. B) Average CNN prediction for AI scenarios, binned by selection coefficient,  $s$ , and time of onset of selection  $T_{sel}$ . C) ROC curves, precision recall curves and True Negative Rate vs. Negative Predictive Value (TNR-NPV) curves. The positive condition is AI. The negative conditions are shown using different line styles/colours. The circles indicate the point in ROC-space (respectively Precision-Recall-space, and TNR-NPV-space) when using the threshold  $\Pr\{AI\} > 0.5$  for classifying a genotype matrix as AI. DFE: distribution of fitness effects. TP: true positives; FP: false positives; TPR: true positive rate; FPR: false positive rate; ROC: Receiver operating characteristics; TNR: true negative rate; TPR: true positive rate.



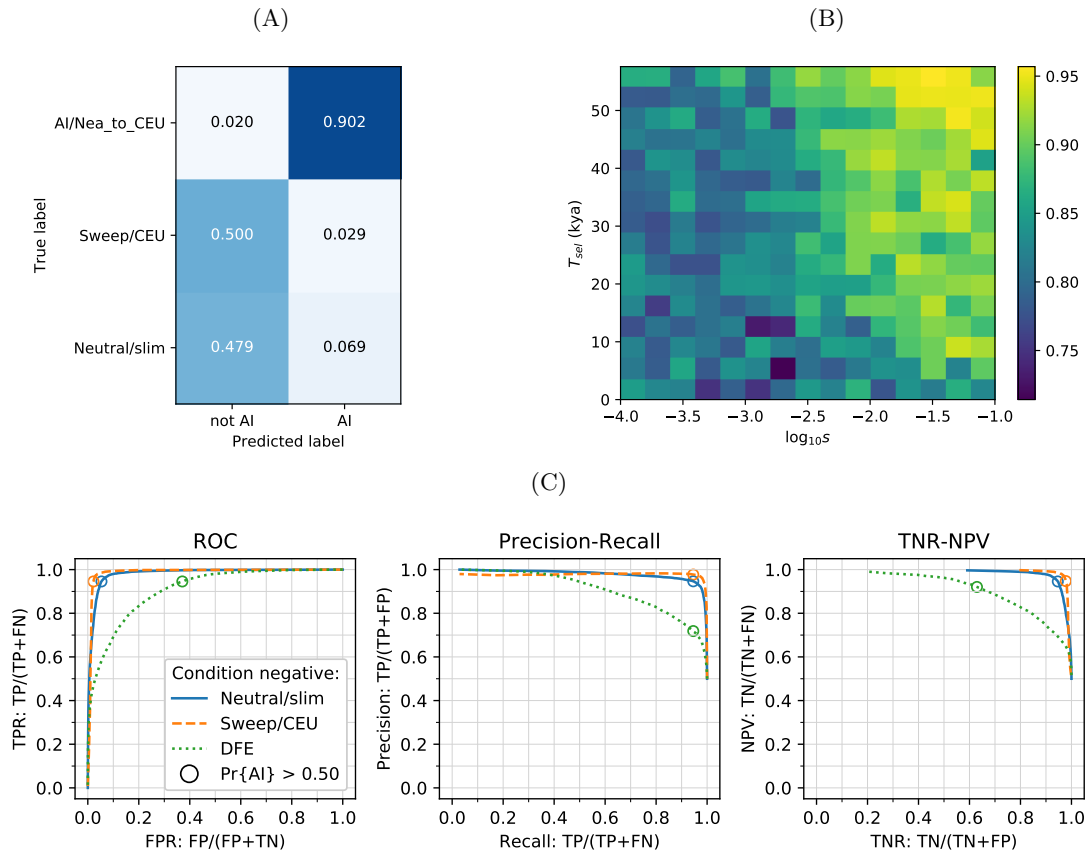

Figure S9: CNN performance on validation simulations for Demographic Model A with phased data. The CNN was trained using only AI simulations with selected mutation having allele frequency  $> 25\%$ . A) Confusion matrix. For the two prediction categories, either "not AI" or AI, we show the proportion attributed to each of the true (simulated) scenarios. B) Average CNN prediction for AI scenarios, binned by selection coefficient,  $s$ , and time of onset of selection  $T_{sel}$ . C) ROC curves, precision recall curves and True Negative Rate vs. Negative Predictive Value (TNR-NPV) curves. The positive condition is AI. The negative conditions are shown using different line styles/colours. The circles indicate the point in ROC-space (respectively Precision-Recall-space, and TNR-NPV-space) when using the threshold  $\Pr\{AI\} > 0.5$  for classifying a genotype matrix as AI. DFE: distribution of fitness effects. TP: true positives; FP: false positives; TPR: true positive rate; FPR: false positive rate; ROC: Receiver operating characteristics; TNR: true negative rate; TPR: true positive rate.

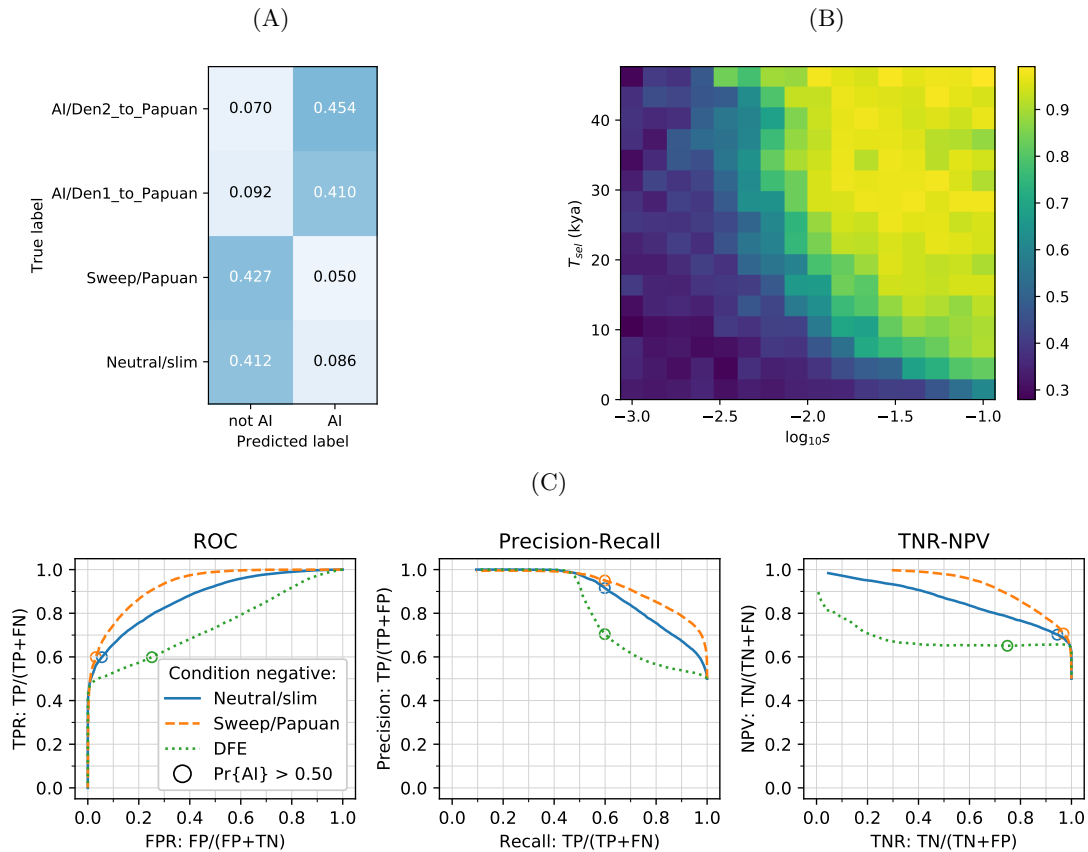

Figure S10: CNN performance on validation simulations for Demographic Model B with unphased data. The CNN was trained using only AI simulations with selected mutation having allele frequency  $> 5\%$ . A) Confusion matrix. For the two prediction categories, either "not AI" or AI, we show the proportion attributed to each of the true (simulated) scenarios. B) Average CNN prediction for AI scenarios, binned by selection coefficient,  $s$ , and time of onset of selection  $T_{sel}$ . C) ROC curves, precision recall curves and True Negative Rate vs. Negative Predictive Value (TNR-NPV) curves. The positive condition is AI. The negative conditions are shown using different line styles/colours. The circles indicate the point in ROC-space (respectively Precision-Recall-space, and TNR-NPV-space) when using the threshold  $\Pr\{AI\} > 0.5$  for classifying a genotype matrix as AI. DFE: distribution of fitness effects. TP: true positives; FP: false positives; TPR: true positive rate; FPR: false positive rate; ROC: Receiver operating characteristics; TNR: true negative rate; TPR: true positive rate.

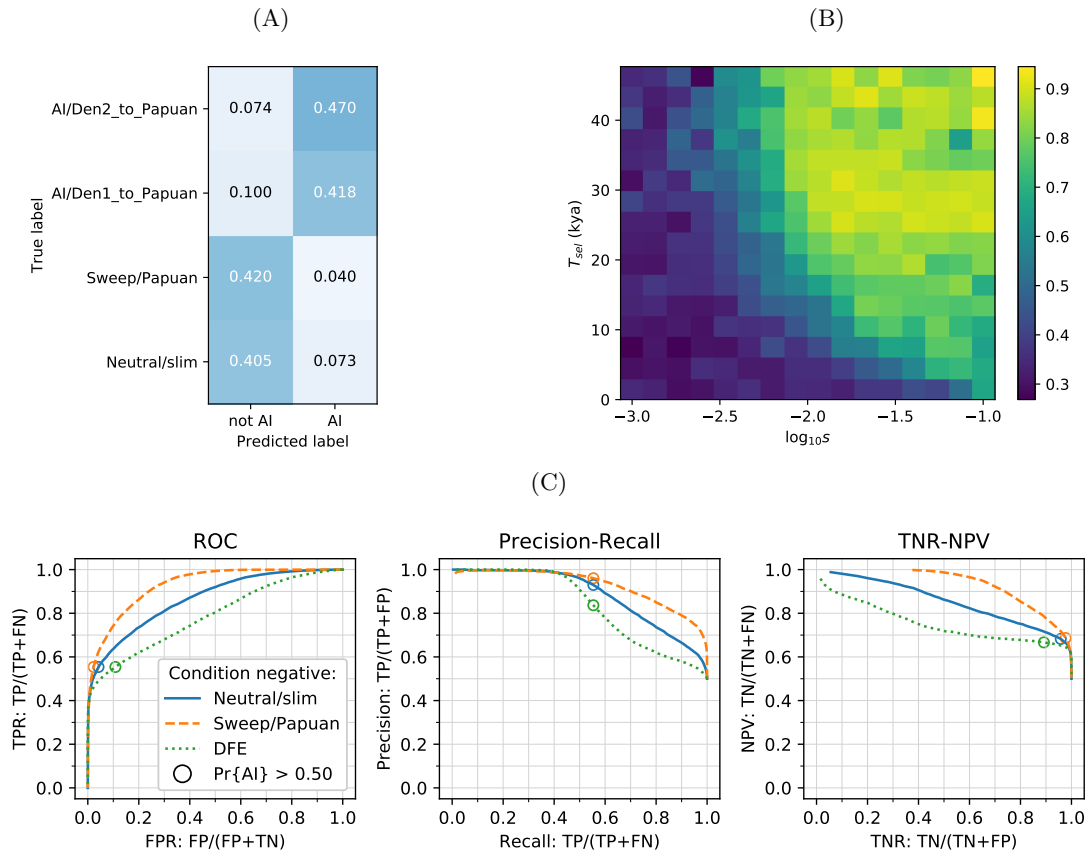

Figure S11: CNN performance on validation simulations for Demographic Model B with unphased data. The CNN was trained using only AI simulations with selected mutation having allele frequency  $> 25\%$ . A) Confusion matrix. For the two prediction categories, either "not AI" or AI, we show the proportion attributed to each of the true (simulated) scenarios. B) Average CNN prediction for AI scenarios, binned by selection coefficient,  $s$ , and time of onset of selection  $T_{sel}$ . C) ROC curves, precision recall curves and True Negative Rate vs. Negative Predictive Value (TNR-NPV) curves. The positive condition is AI. The negative conditions are shown using different line styles/colours. The circles indicate the point in ROC-space (respectively Precision-Recall-space, and TNR-NPV-space) when using the threshold  $\Pr\{AI\} > 0.5$  for classifying a genotype matrix as AI. DFE: distribution of fitness effects. TP: true positives; FP: false positives; TPR: true positive rate; FPR: false positive rate; ROC: Receiver operating characteristics; TNR: true negative rate; TPR: true positive rate.

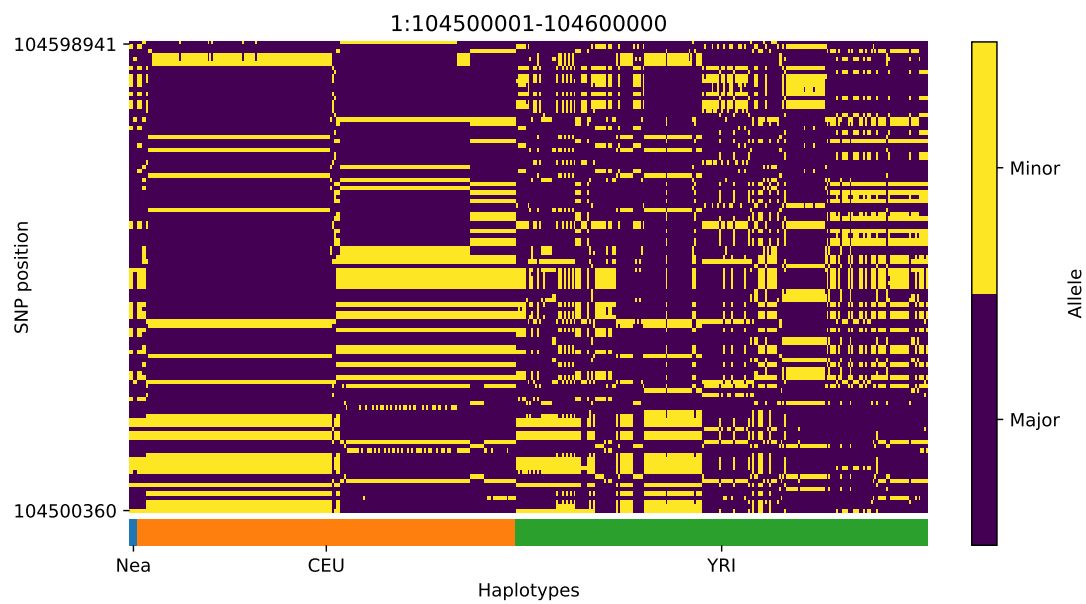

Figure S12: Haplotype plot for the candidate region chr1:104500001-104600000 in the Neanderthal-into-European AI scan. Bright yellow indicates minor allele, dark blue indicates major allele. Haplotypes within populations are sorted left-to-right by similarity to Neanderthals.

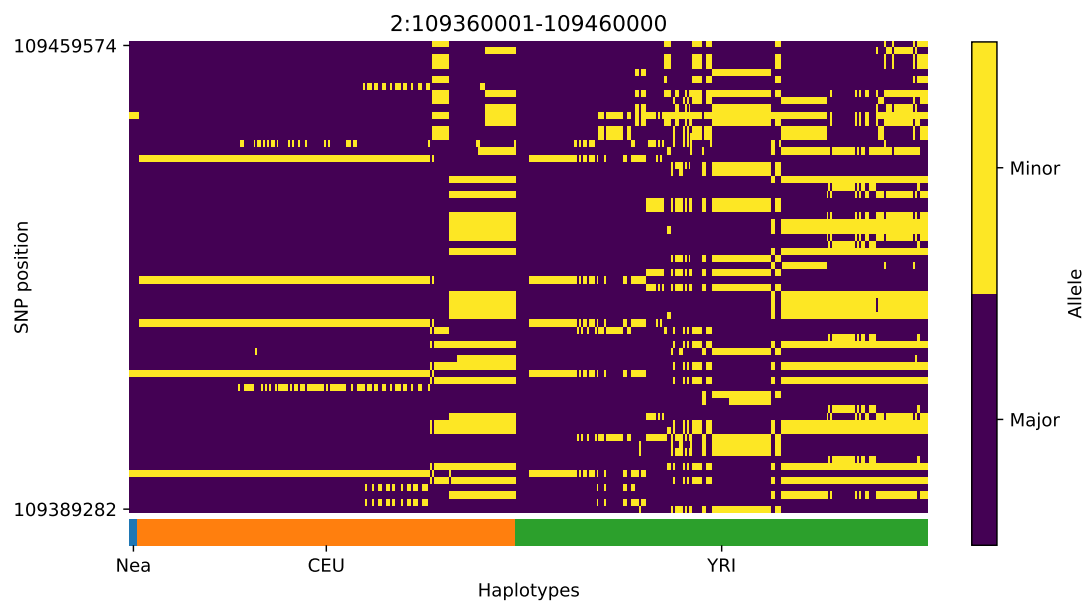

Figure S13: Haplotype plot for the candidate region chr2:109360001-109460000 in the Neanderthal-into-European AI scan. Bright yellow indicates minor allele, dark blue indicates major allele. Haplotypes within populations are sorted left-to-right by similarity to Neanderthals.

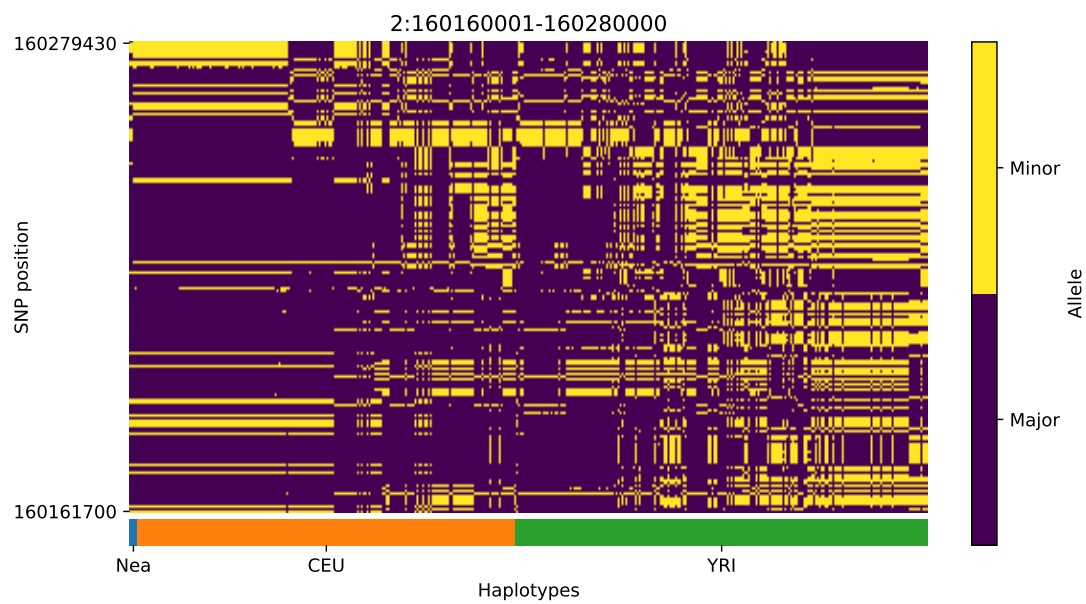

Figure S14: Haplotype plot for the candidate region chr2:160160001-160280000 in the Neanderthal-into-European AI scan. Bright yellow indicates minor allele, dark blue indicates major allele. Haplotypes within populations are sorted left-to-right by similarity to Neanderthals.

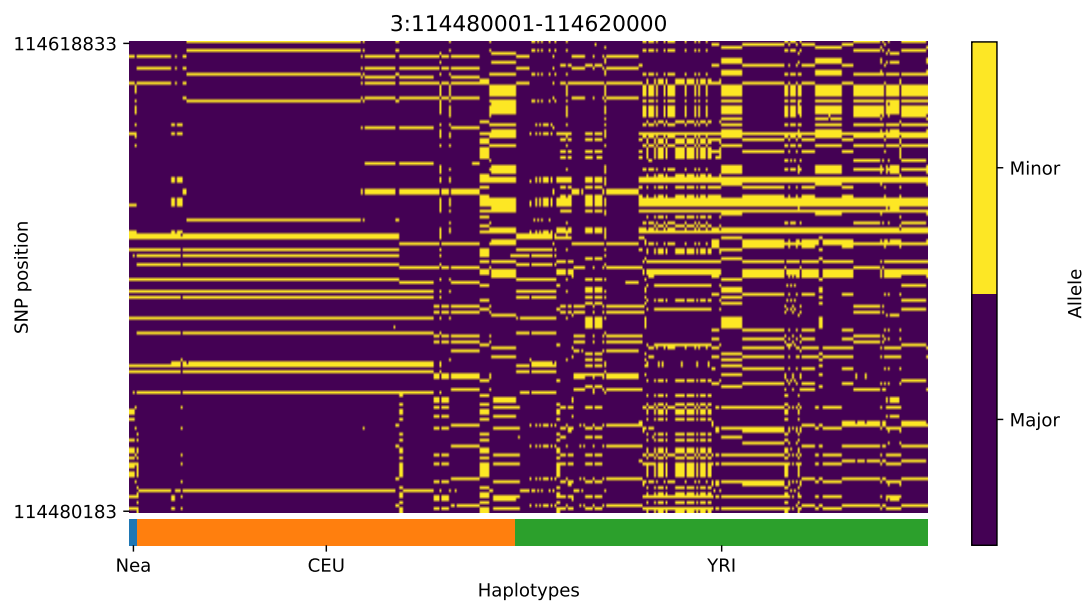

Figure S15: Haplotype plot for the candidate region chr3:114480001-114620000 in the Neanderthal-into-European AI scan. Bright yellow indicates minor allele, dark blue indicates major allele. Haplotypes within populations are sorted left-to-right by similarity to Neanderthals.

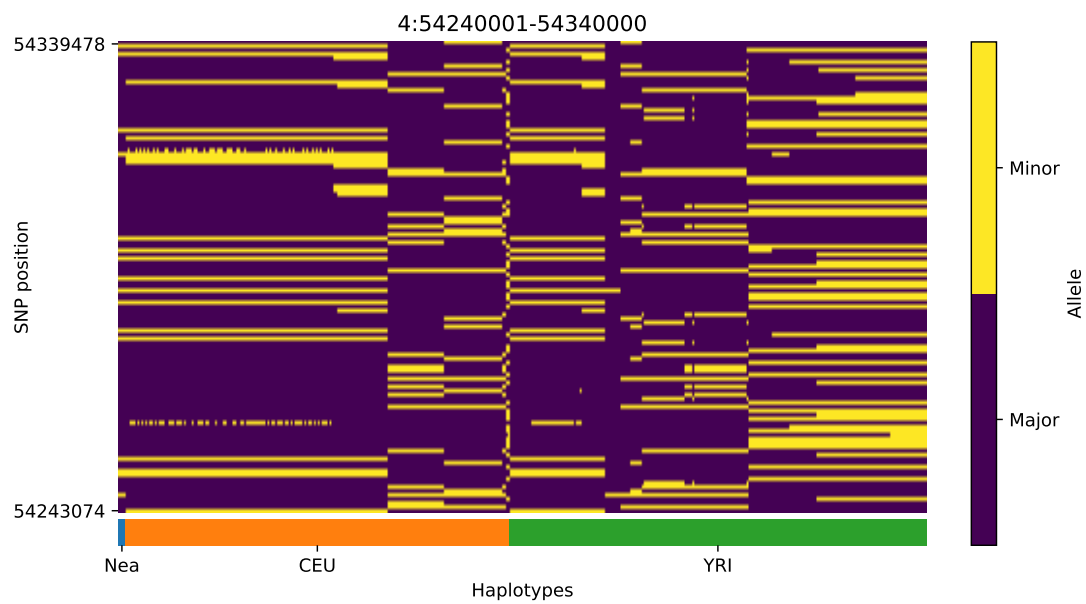

Figure S16: Haplotype plot for the candidate region chr4:54240001-54340000 in the Neanderthal-into-European AI scan. Bright yellow indicates minor allele, dark blue indicates major allele. Haplotypes within populations are sorted left-to-right by similarity to Neanderthals.



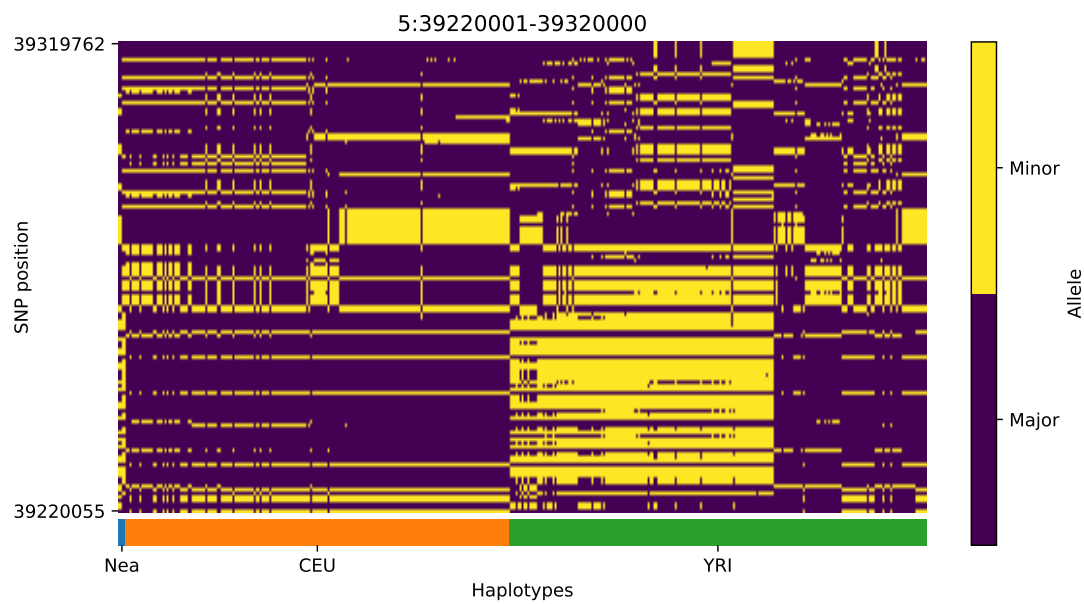

Figure S17: Haplotype plot for the candidate region chr5:39220001-39320000 in the Neanderthal-into-European AI scan. Bright yellow indicates minor allele, dark blue indicates major allele. Haplotypes within populations are sorted left-to-right by similarity to Neanderthals.

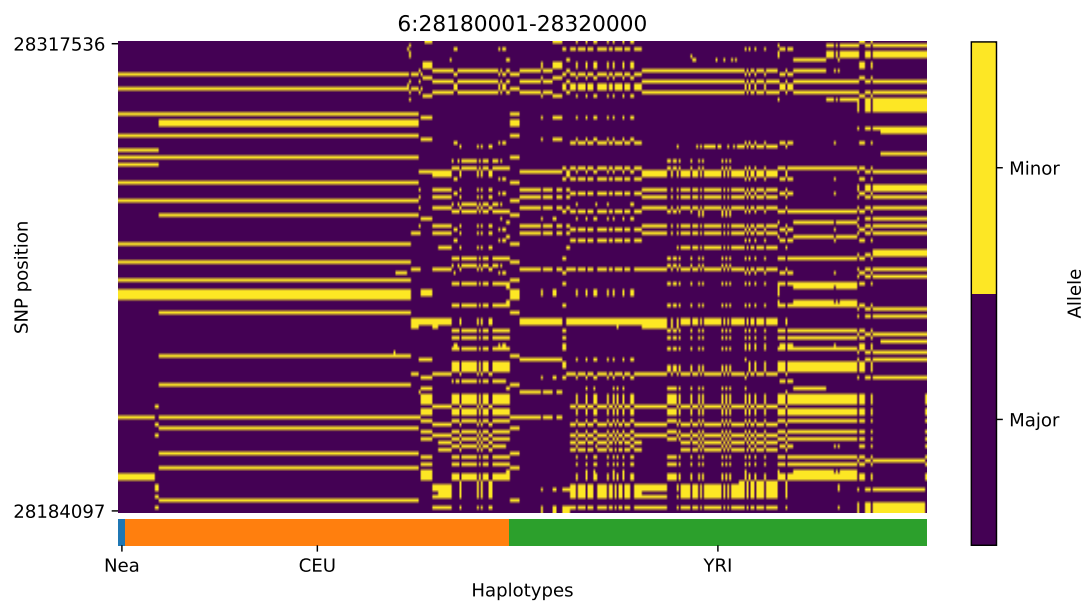

Figure S18: Haplotype plot for the candidate region chr6:28180001-28320000 in the Neanderthal-into-European AI scan. Bright yellow indicates minor allele, dark blue indicates major allele. Haplotypes within populations are sorted left-to-right by similarity to Neanderthals.

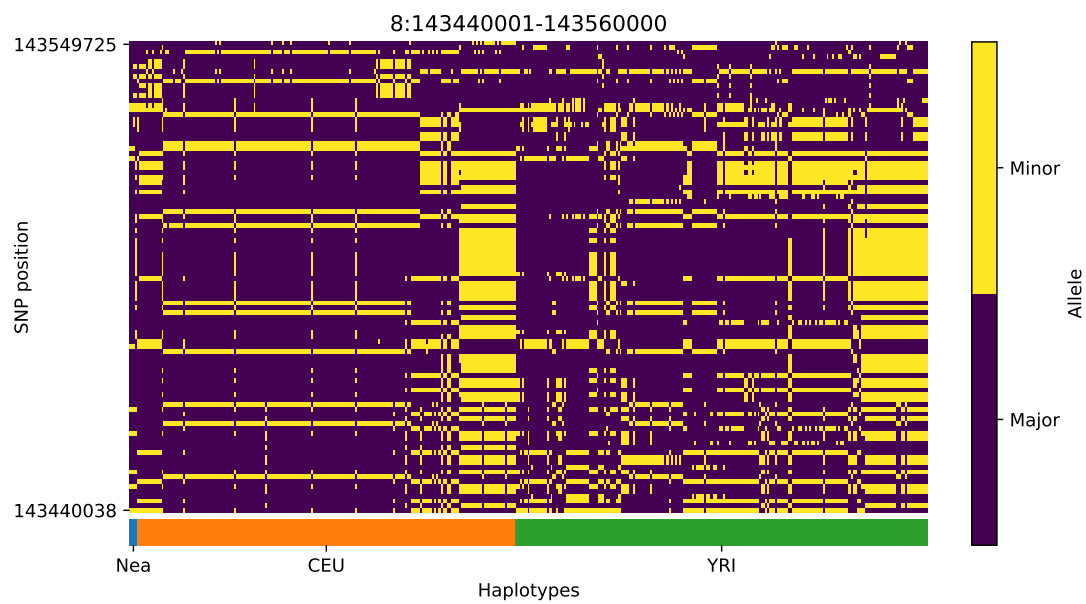

Figure S19: Haplotype plot for the candidate region chr8:143440001-143560000 in the Neanderthal-into-European AI scan. Bright yellow indicates minor allele, dark blue indicates major allele. Haplotypes within populations are sorted left-to-right by similarity to Neanderthals.

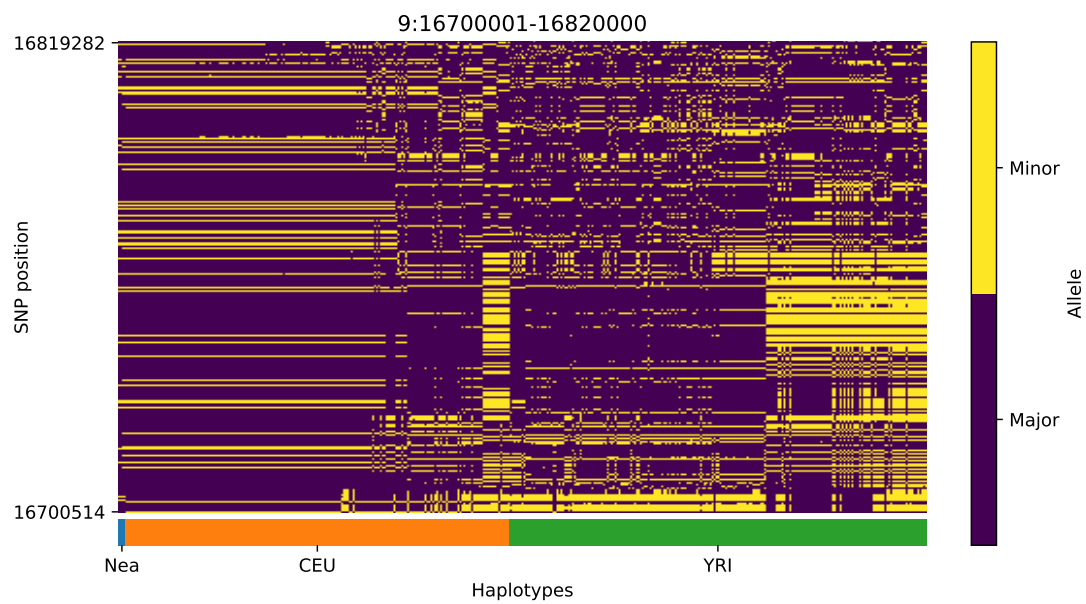

Figure S20: Haplotype plot for the candidate region chr9:16700001-16820000 in the Neanderthal-into-European AI scan. Bright yellow indicates minor allele, dark blue indicates major allele. Haplotypes within populations are sorted left-to-right by similarity to Neanderthals.

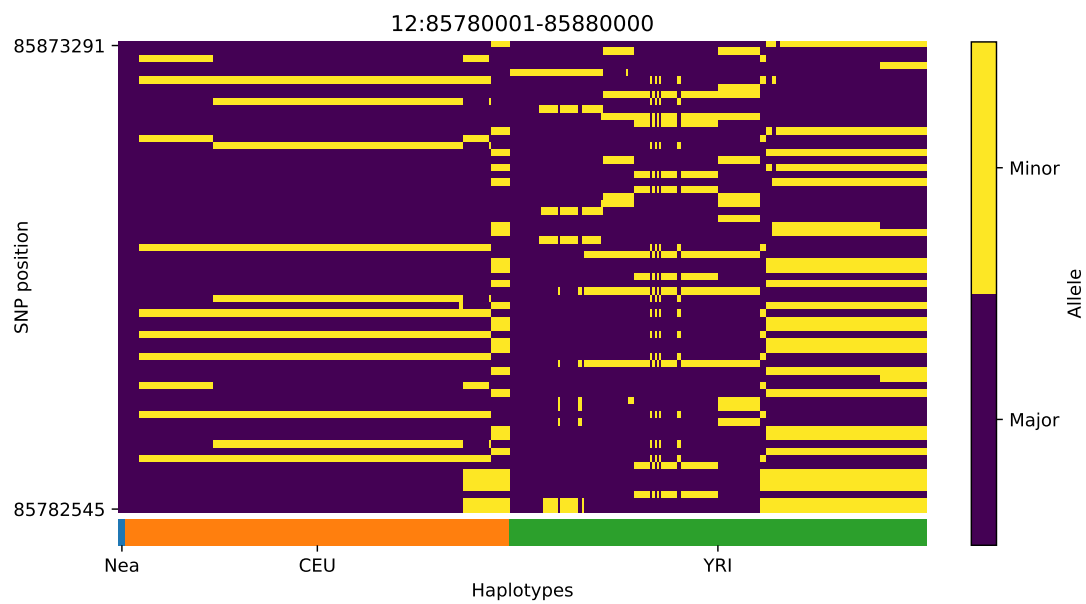

Figure S21: Haplotype plot for the candidate region chr12:85780001-85880000 in the Neanderthal-into-European AI scan. Bright yellow indicates minor allele, dark blue indicates major allele. Haplotypes within populations are sorted left-to-right by similarity to Neanderthals.

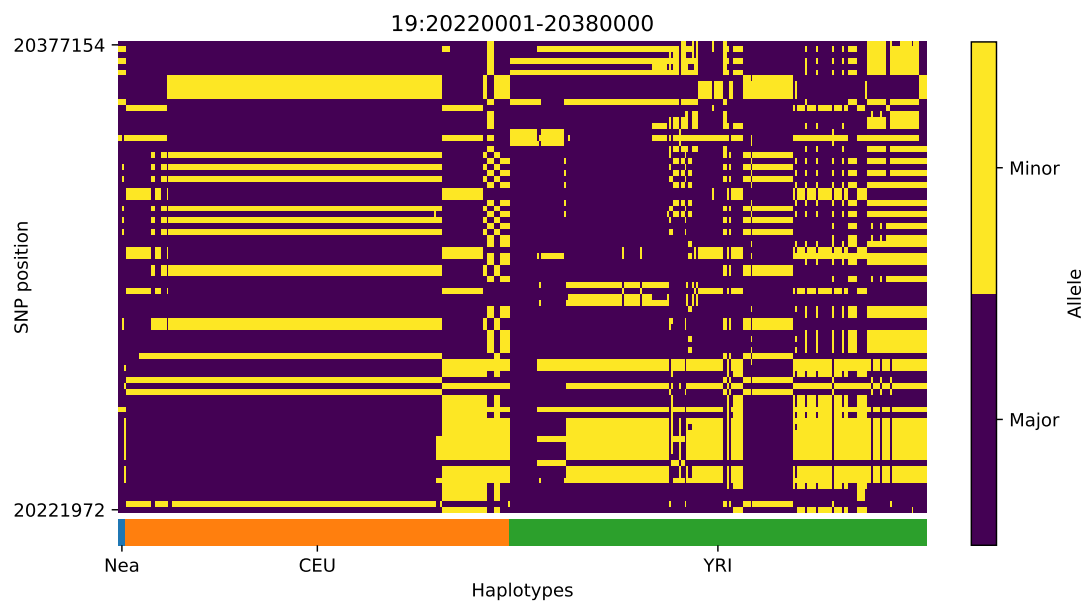

Figure S22: Haplotype plot for the candidate region chr19:20220001-20380000 in the Neanderthal-into-European AI scan. Bright yellow indicates minor allele, dark blue indicates major allele. Haplotypes within populations are sorted left-to-right by similarity to Neanderthals.

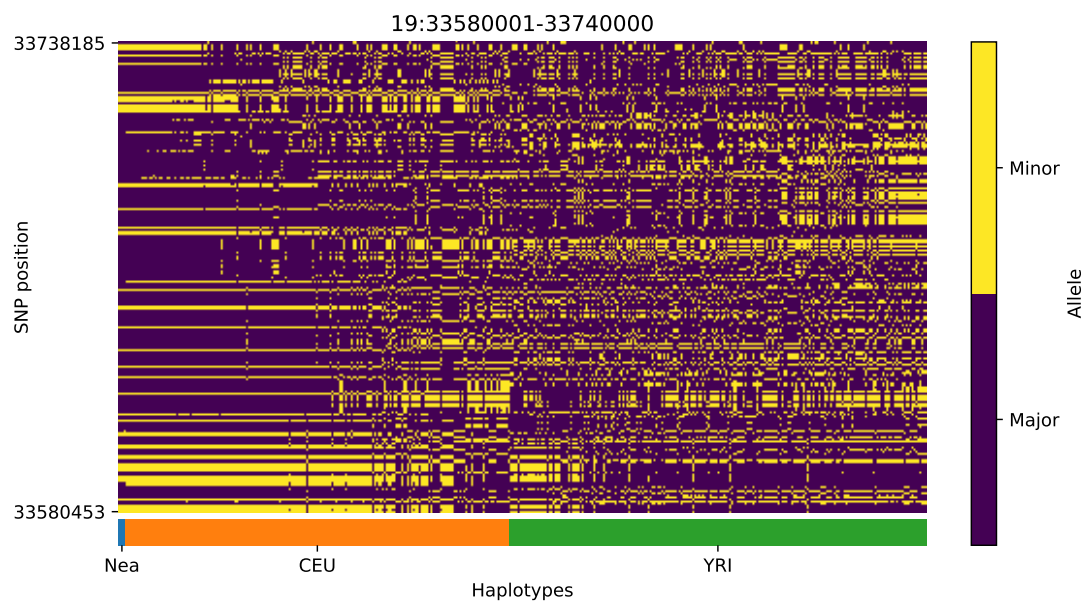

Figure S23: Haplotype plot for the candidate region chr19:33580001-33740000 in the Neanderthal-into-European AI scan. Bright yellow indicates minor allele, dark blue indicates major allele. Haplotypes within populations are sorted left-to-right by similarity to Neanderthals.

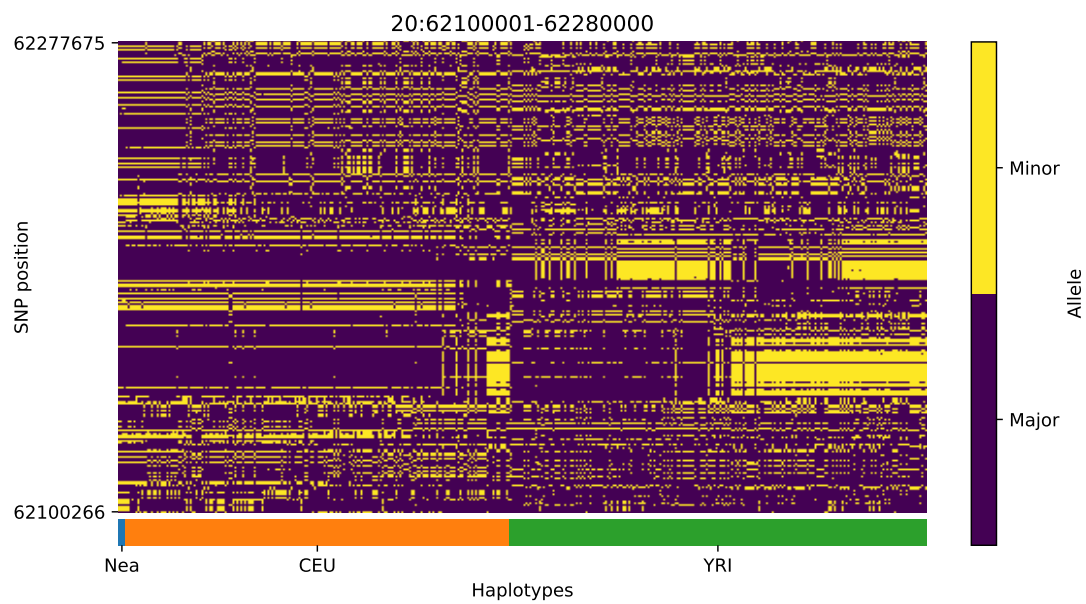

Figure S24: Haplotype plot for the candidate region chr20:62100001-62280000 in the Neanderthal-into-European AI scan. Bright yellow indicates minor allele, dark blue indicates major allele. Haplotypes within populations are sorted left-to-right by similarity to Neanderthals.



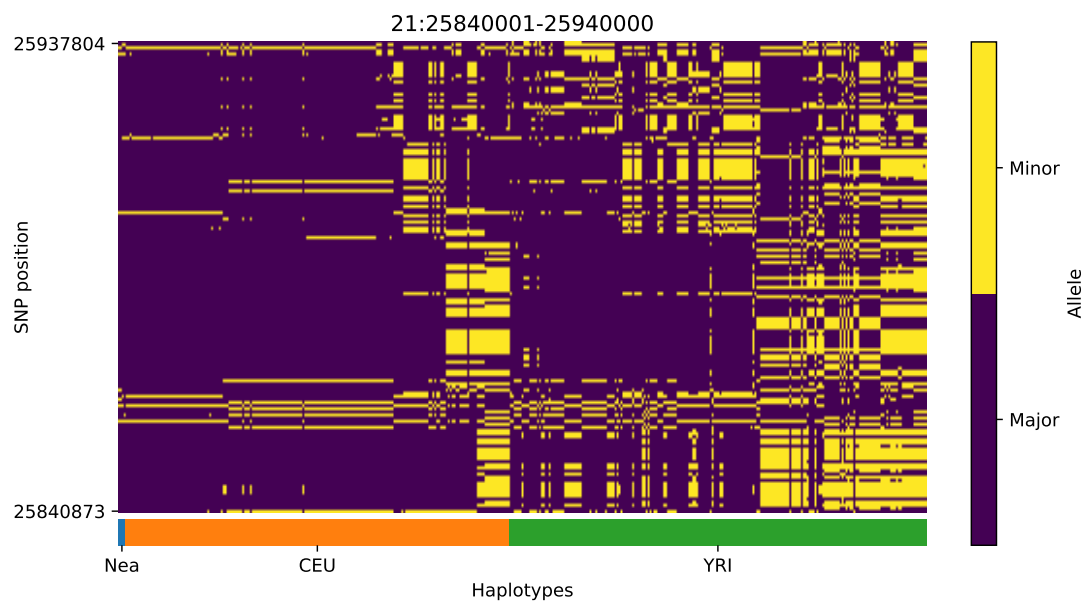

Figure S25: Haplotype plot for the candidate region chr21:25840001-25940000 in the Neanderthal-into-European AI scan. Bright yellow indicates minor allele, dark blue indicates major allele. Haplotypes within populations are sorted left-to-right by similarity to Neanderthals.

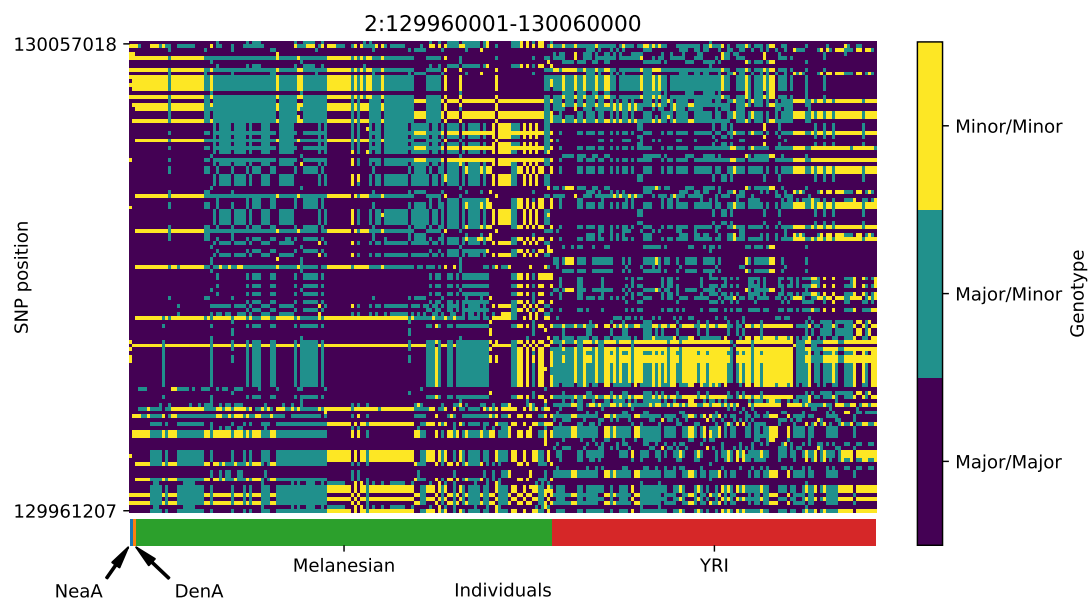

Figure S26: Genotype plot for the candidate region chr2:129960001-130060000 in the Denisovan-into-Melanesian AI scan. Dark blue = homozygote major allele, light blue = heterozygote, yellow = homozygote minor allele. Genotypes within populations are sorted left-to-right by similarity to the Denisovan.

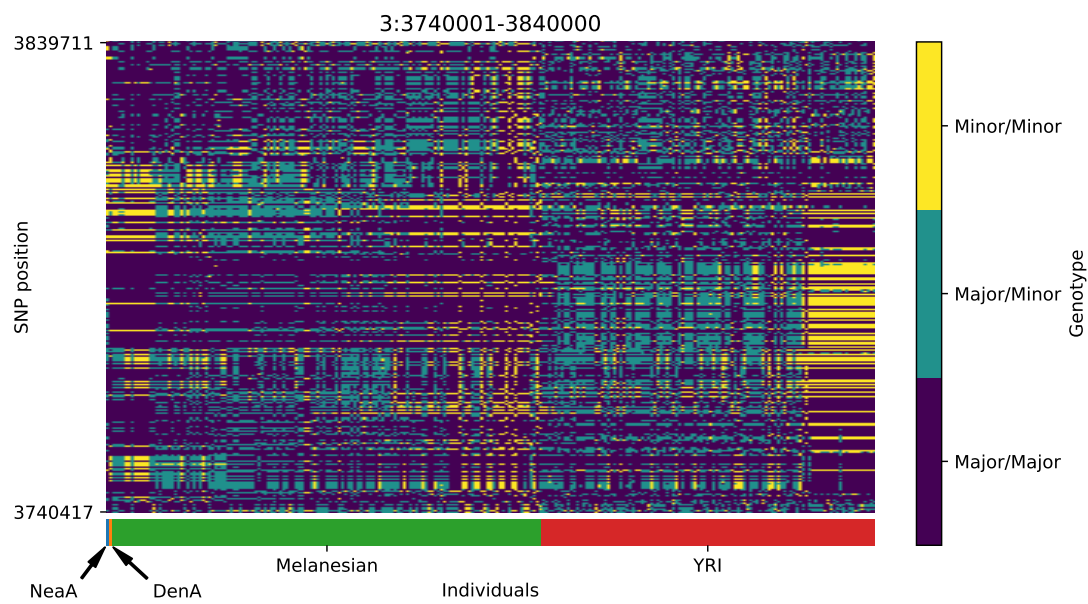

Figure S27: Genotype plot for the candidate region chr3:3740001-3840000 in the Denisovan-into-Melanesian AI scan. Dark blue = homozygote major allele, light blue = heterozygote, yellow = homozygote minor allele. Genotypes within populations are sorted left-to-right by similarity to the Denisovan.

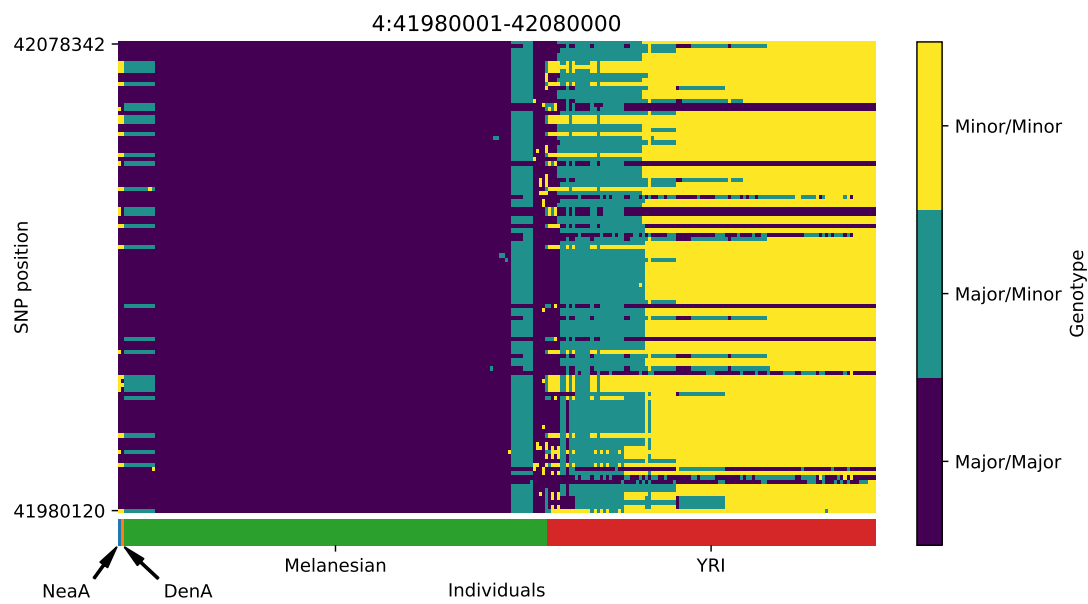

Figure S28: Genotype plot for the candidate region chr4:41980001-42080000 in the Denisovan-into-Melanesian AI scan. Dark blue = homozygote major allele, light blue = heterozygote, yellow = homozygote minor allele. Genotypes within populations are sorted left-to-right by similarity to the Denisovan.

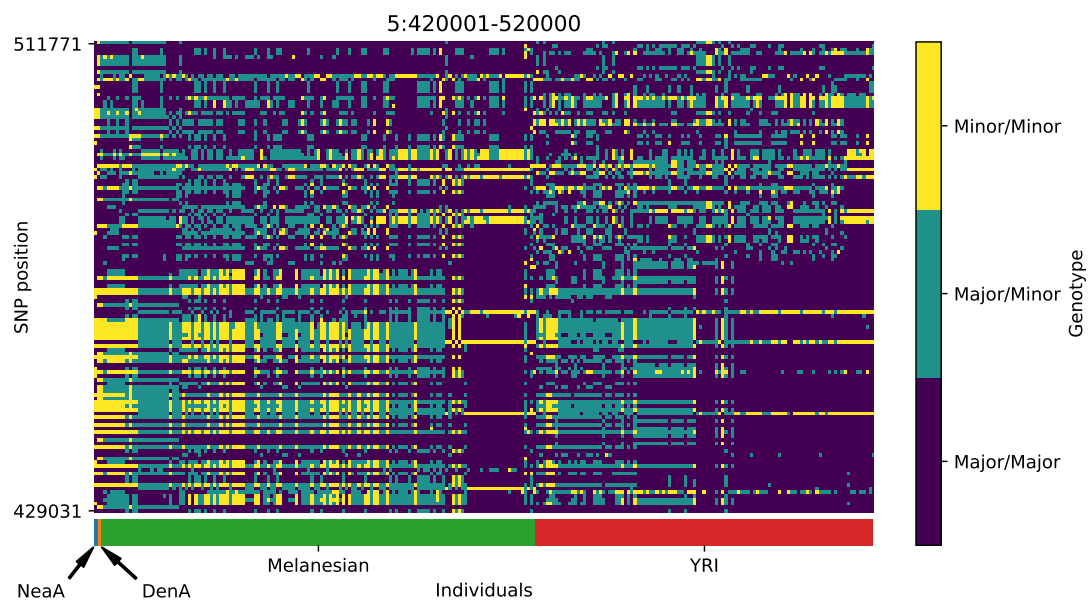

Figure S29: Genotype plot for the candidate region chr5:420001-520000 in the Denisovan-into-Melanesian AI scan. Dark blue = homozygote major allele, light blue = heterozygote, yellow = homozygote minor allele. Genotypes within populations are sorted left-to-right by similarity to the Denisovan.

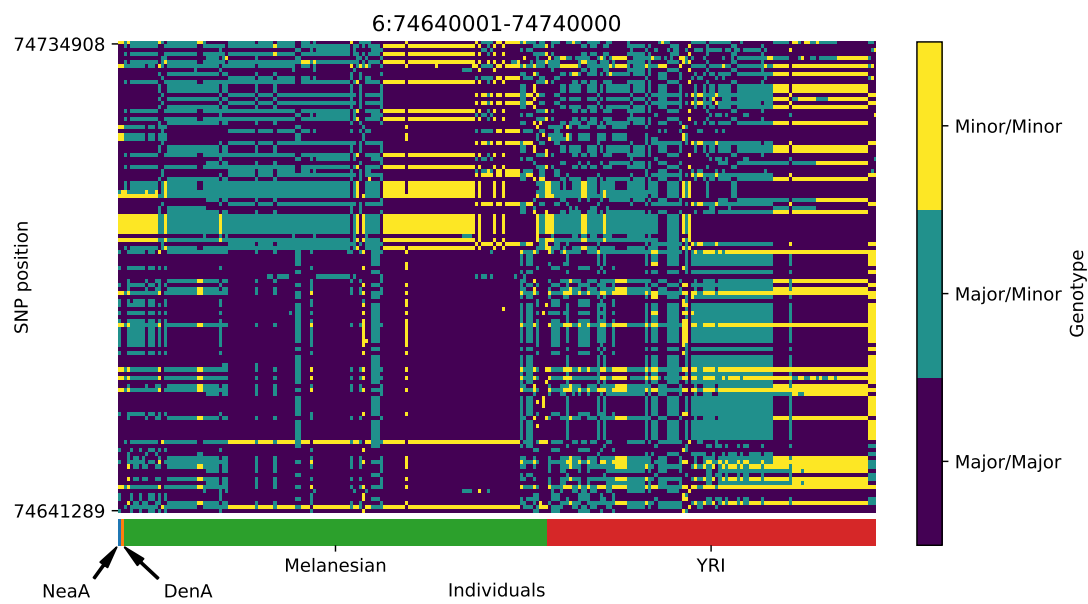

Figure S30: Genotype plot for the candidate region chr6:74640001-74740000 in the Denisovan-into-Melanesian AI scan. Dark blue = homozygote major allele, light blue = heterozygote, yellow = homozygote minor allele. Genotypes within populations are sorted left-to-right by similarity to the Denisovan.

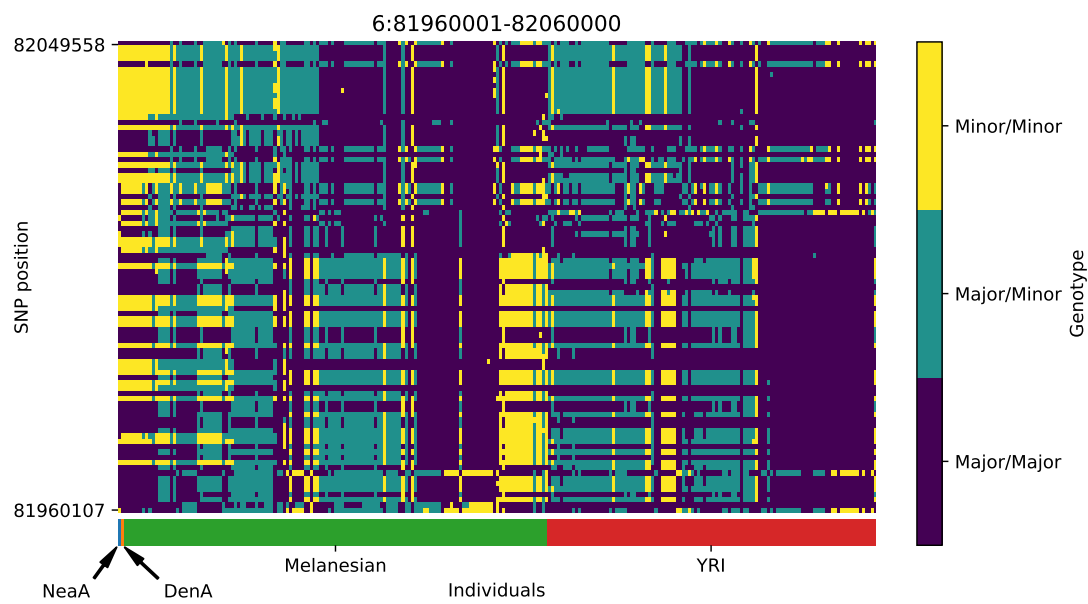

Figure S31: Genotype plot for the candidate region chr6:81960001-82060000 in the Denisovan-into-Melanesian AI scan. Dark blue = homozygote major allele, light blue = heterozygote, yellow = homozygote minor allele. Genotypes within populations are sorted left-to-right by similarity to the Denisovan.

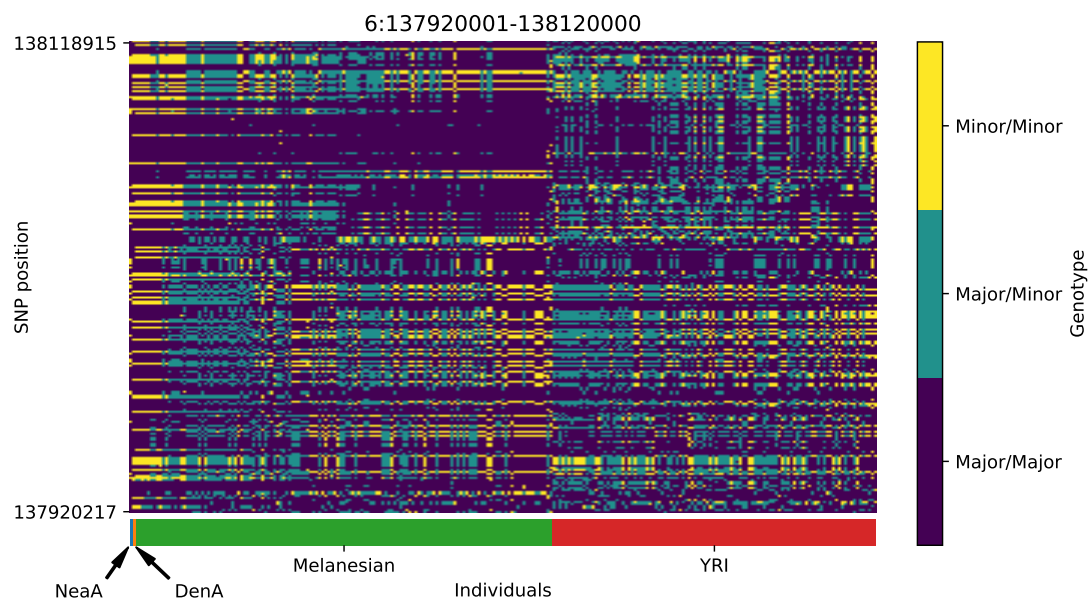

Figure S32: Genotype plot for the candidate region chr6:137920001-138120000 in the Denisovan-into-Melanesian AI scan. Dark blue = homozygote major allele, light blue = heterozygote, yellow = homozygote minor allele. Genotypes within populations are sorted left-to-right by similarity to the Denisovan.



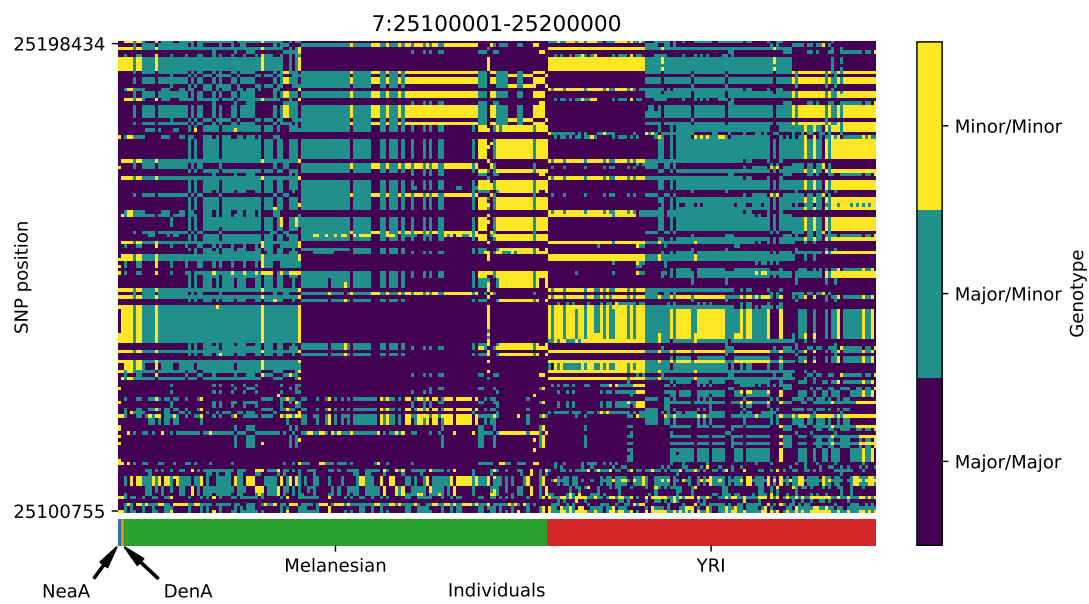

Figure S33: Genotype plot for the candidate region chr7:25100001-25200000 in the Denisovan-into-Melanesian AI scan. Dark blue = homozygote major allele, light blue = heterozygote, yellow = homozygote minor allele. Genotypes within populations are sorted left-to-right by similarity to the Denisovan.

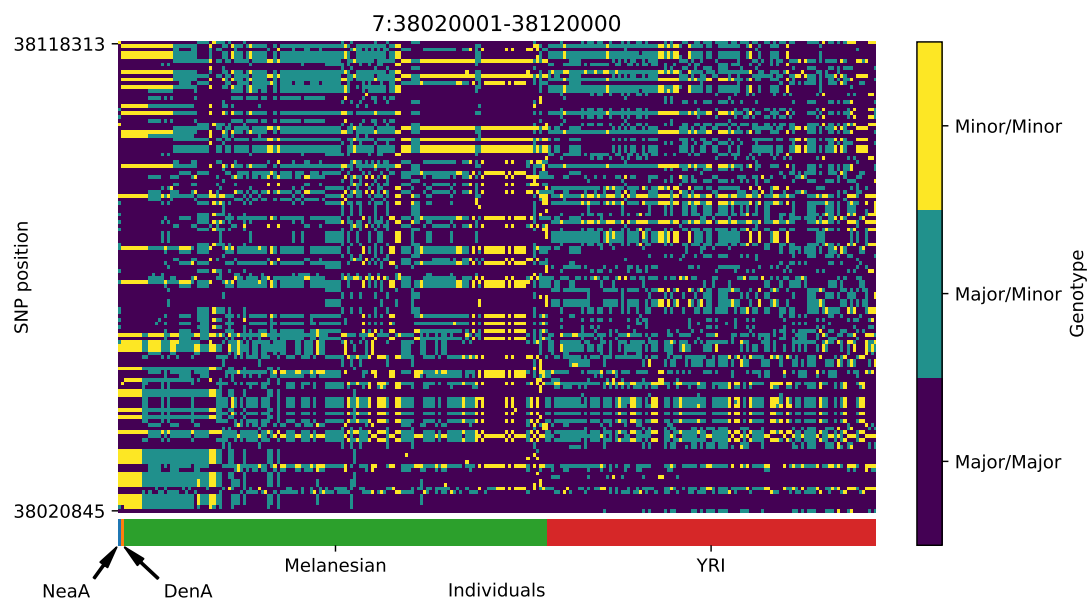

Figure S34: Genotype plot for the candidate region chr7:38020001-38120000 in the Denisovan-into-Melanesian AI scan. Dark blue = homozygote major allele, light blue = heterozygote, yellow = homozygote minor allele. Genotypes within populations are sorted left-to-right by similarity to the Denisovan.

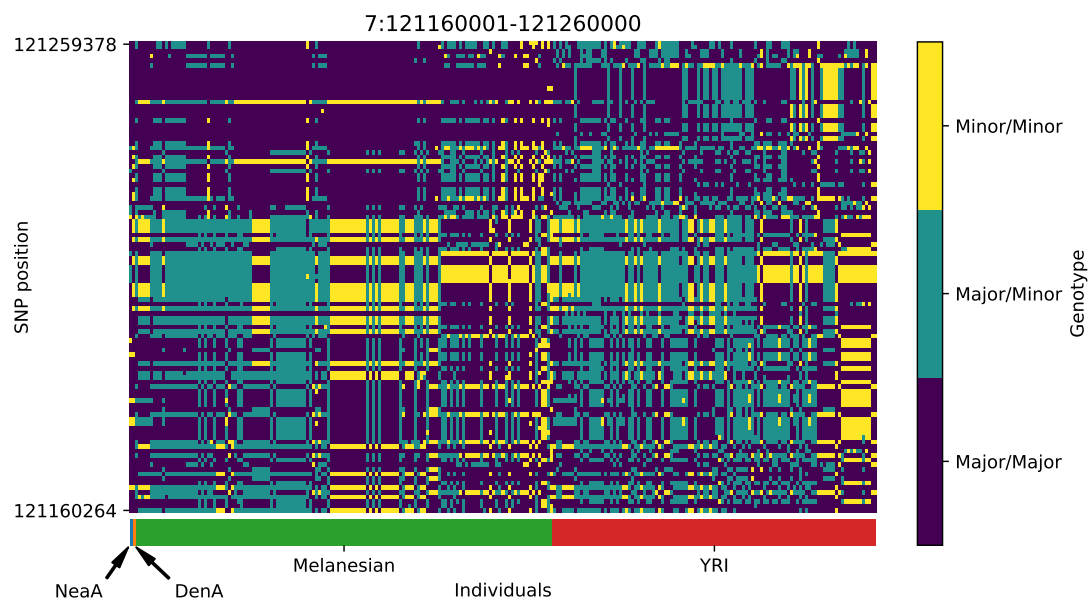

Figure S35: Genotype plot for the candidate region chr7:121160001-121260000 in the Denisovan-into-Melanesian AI scan. Dark blue = homozygote major allele, light blue = heterozygote, yellow = homozygote minor allele. Genotypes within populations are sorted left-to-right by similarity to the Denisovan.

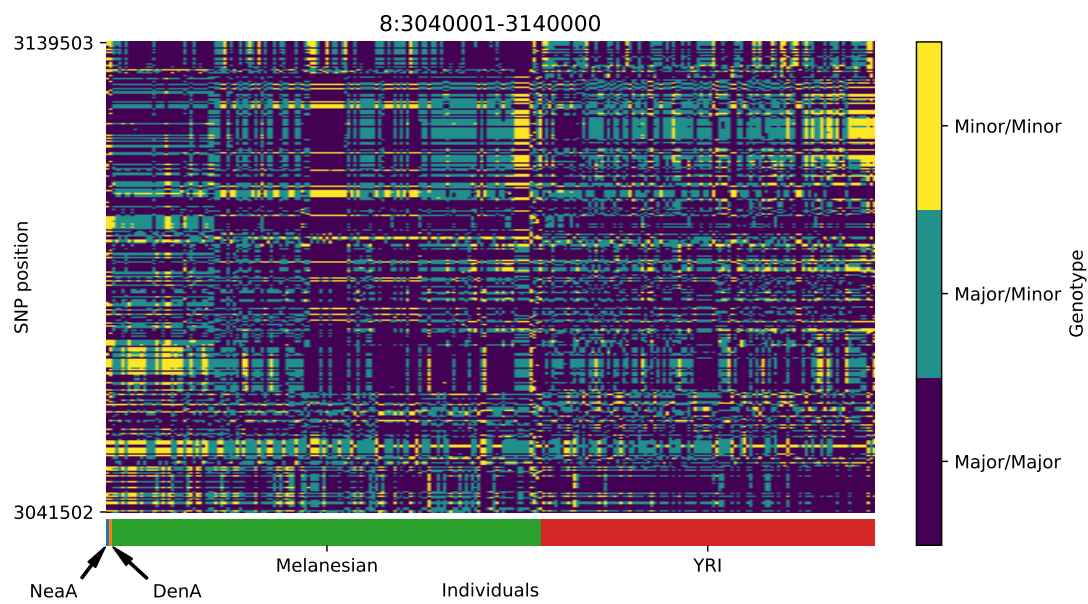

Figure S36: Genotype plot for the candidate region chr8:3040001-3140000 in the Denisovan-into-Melanesian AI scan. Dark blue = homozygote major allele, light blue = heterozygote, yellow = homozygote minor allele. Genotypes within populations are sorted left-to-right by similarity to the Denisovan.

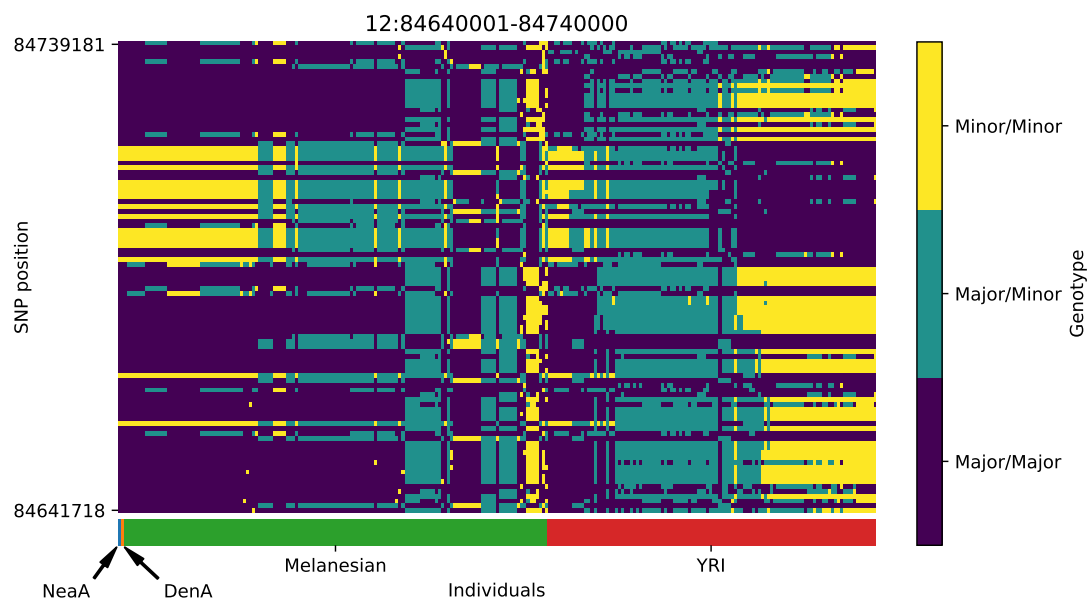

Figure S37: Genotype plot for the candidate region chr12:84640001-84740000 in the Denisovan-into-Melanesian AI scan. Dark blue = homozygote major allele, light blue = heterozygote, yellow = homozygote minor allele. Genotypes within populations are sorted left-to-right by similarity to the Denisovan.

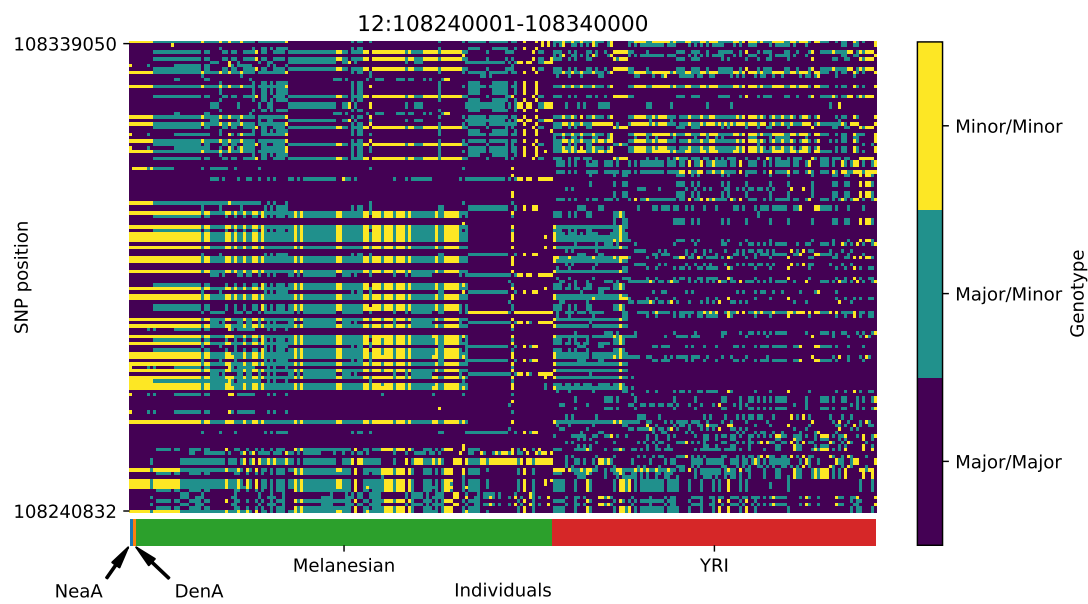

Figure S38: Genotype plot for the candidate region chr12:108240001-108340000 in the Denisovan-into-Melanesian AI scan. Dark blue = homozygote major allele, light blue = heterozygote, yellow = homozygote minor allele. Genotypes within populations are sorted left-to-right by similarity to the Denisovan.

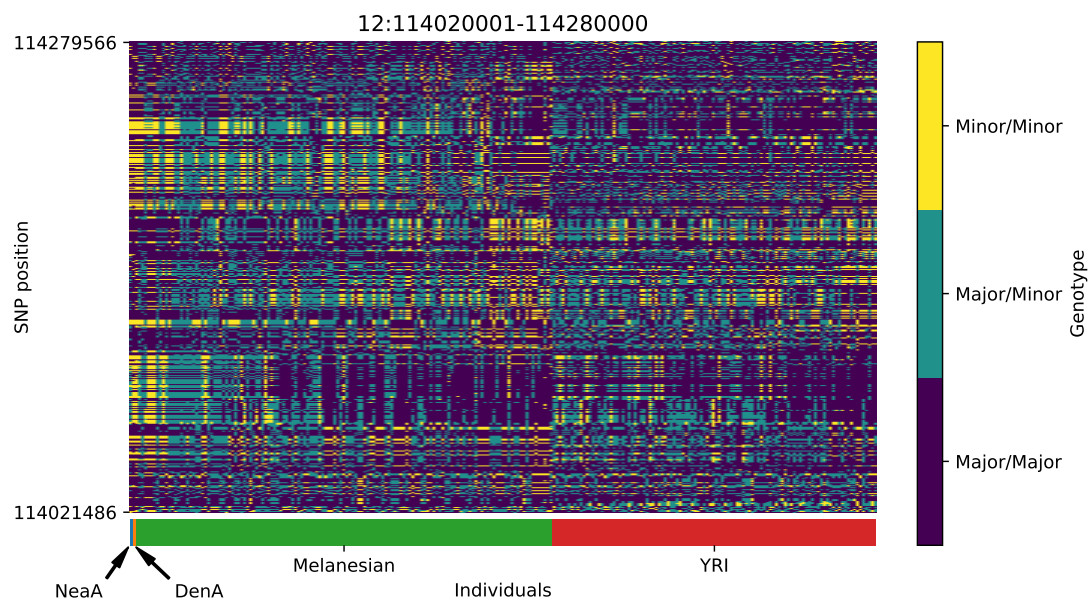

Figure S39: Genotype plot for the candidate region chr12:114020001-114280000 in the Denisovan-into-Melanesian AI scan. Dark blue = homozygote major allele, light blue = heterozygote, yellow = homozygote minor allele. Genotypes within populations are sorted left-to-right by similarity to the Denisovan.

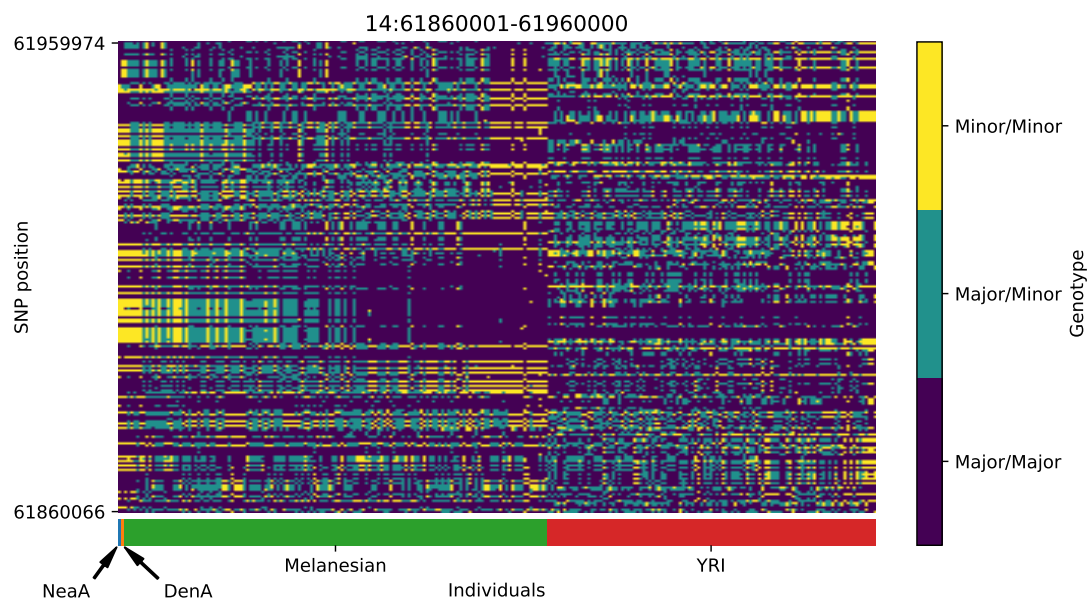

Figure S40: Genotype plot for the candidate region chr14:61860001-61960000 in the Denisovan-into-Melanesian AI scan. Dark blue = homozygote major allele, light blue = heterozygote, yellow = homozygote minor allele. Genotypes within populations are sorted left-to-right by similarity to the Denisovan.



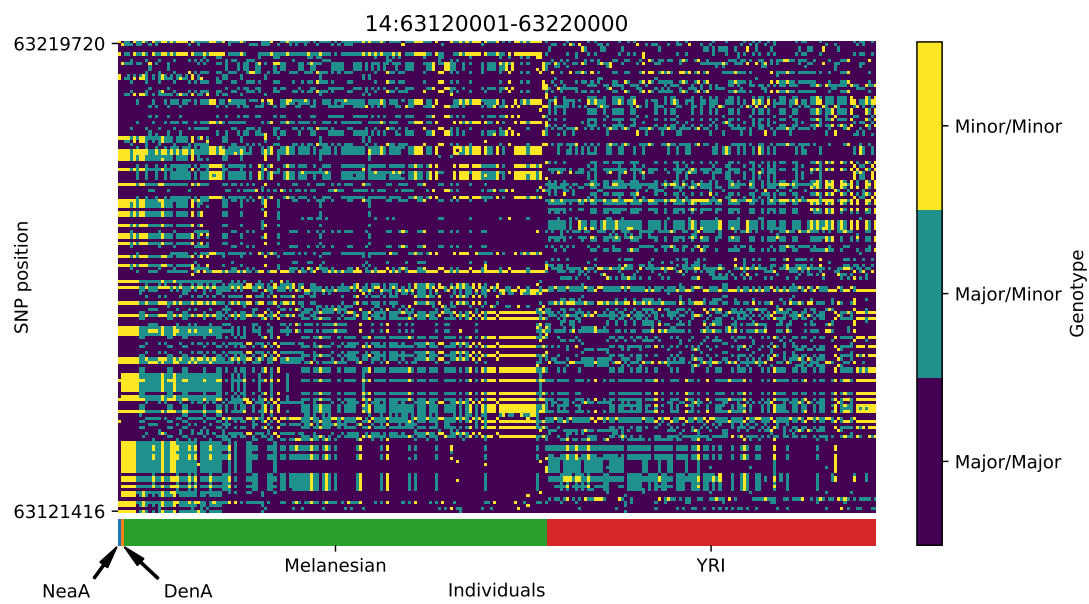

Figure S41: Genotype plot for the candidate region chr14:63120001-63220000 in the Denisovan-into-Melanesian AI scan. Dark blue = homozygote major allele, light blue = heterozygote, yellow = homozygote minor allele. Genotypes within populations are sorted left-to-right by similarity to the Denisovan.

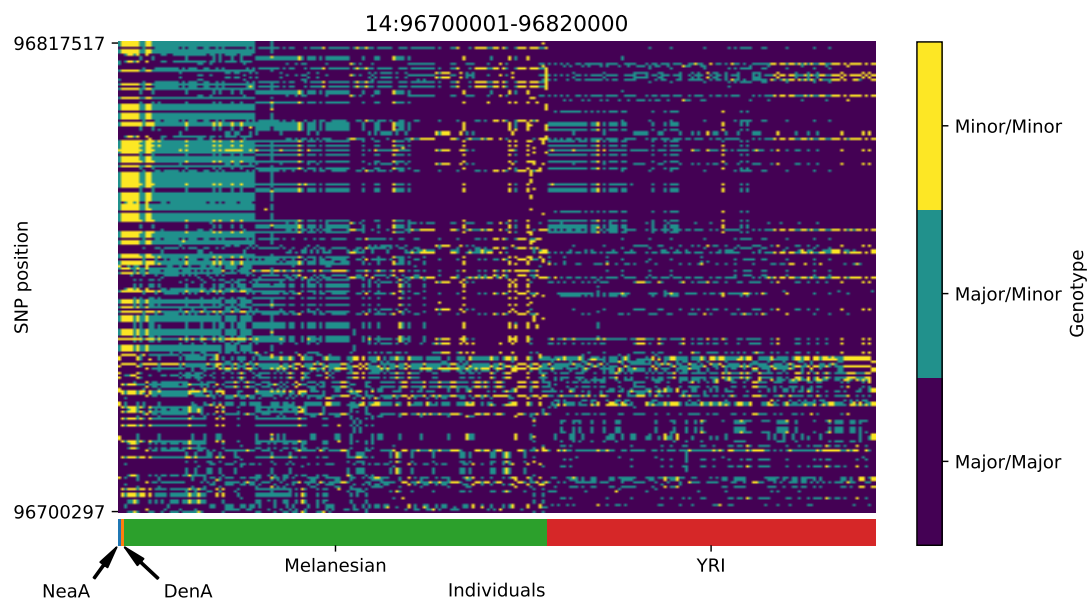

Figure S42: Genotype plot for the candidate region chr14:96700001-96820000 in the Denisovan-into-Melanesian AI scan. Dark blue = homozygote major allele, light blue = heterozygote, yellow = homozygote minor allele. Genotypes within populations are sorted left-to-right by similarity to the Denisovan.

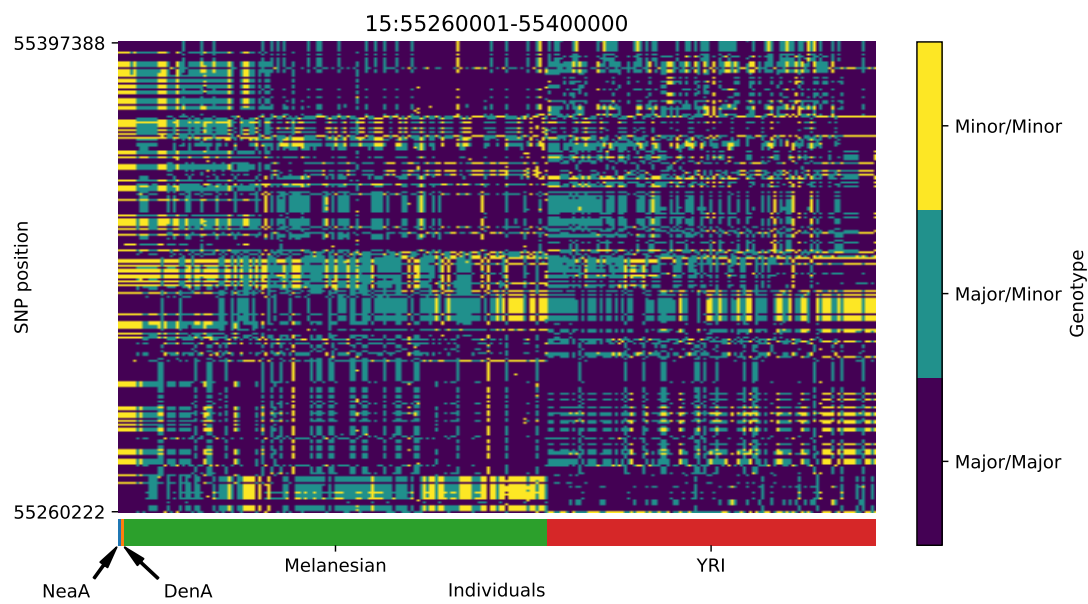

Figure S43: Genotype plot for the candidate region chr15:55260001-55400000 in the Denisovan-into-Melanesian AI scan. Dark blue = homozygote major allele, light blue = heterozygote, yellow = homozygote minor allele. Genotypes within populations are sorted left-to-right by similarity to the Denisovan.

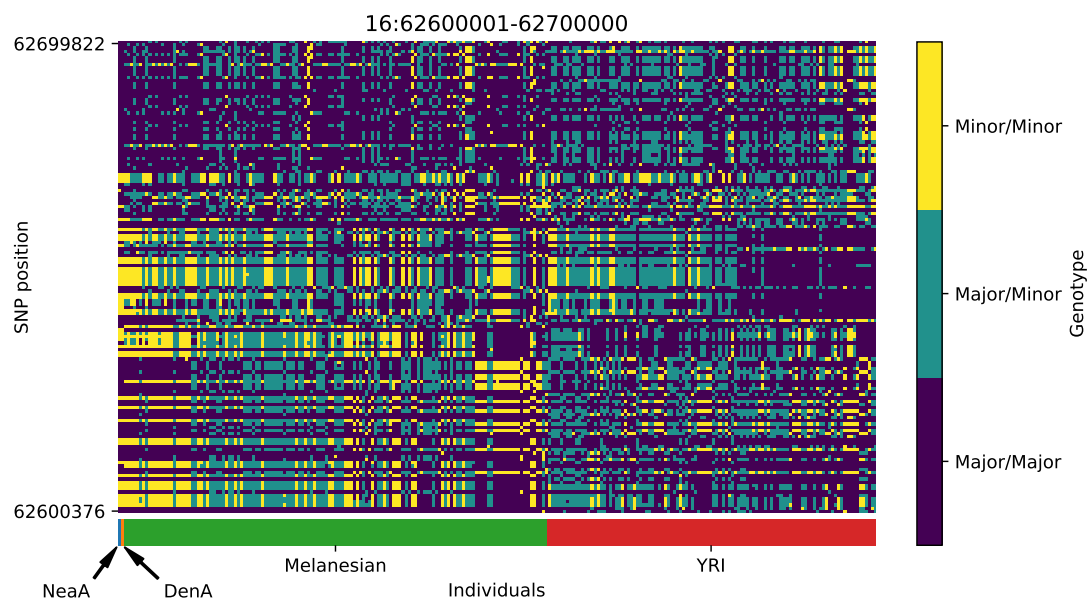

Figure S44: Genotype plot for the candidate region chr16:62600001-62700000 in the Denisovan-into-Melanesian AI scan. Dark blue = homozygote major allele, light blue = heterozygote, yellow = homozygote minor allele. Genotypes within populations are sorted left-to-right by similarity to the Denisovan.

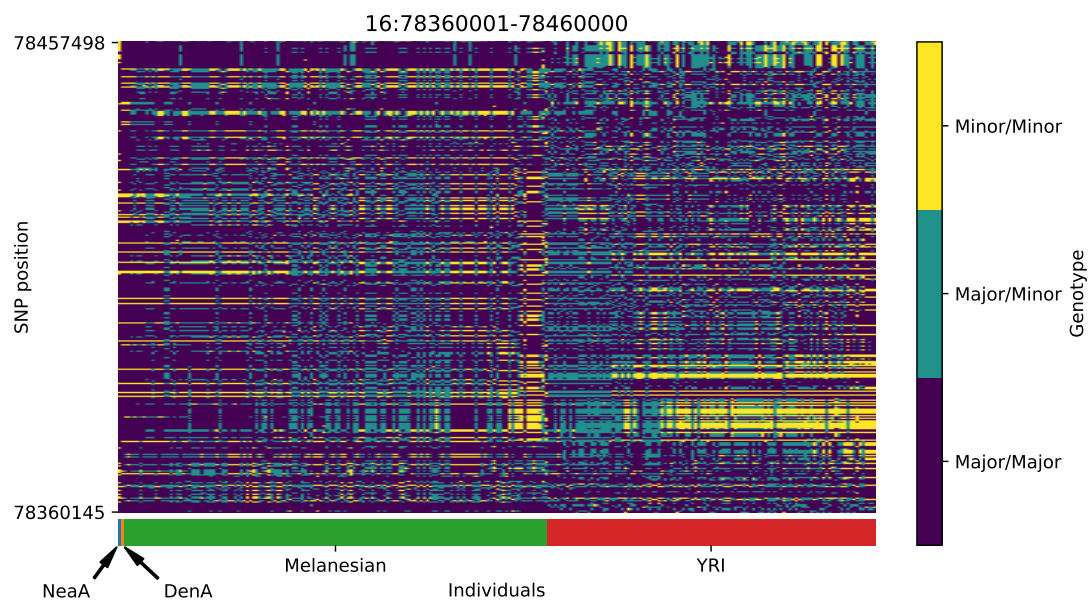

Figure S45: Genotype plot for the candidate region chr16:78360001-78460000 in the Denisovan-into-Melanesian AI scan. Dark blue = homozygote major allele, light blue = heterozygote, yellow = homozygote minor allele. Genotypes within populations are sorted left-to-right by similarity to the Denisovan.

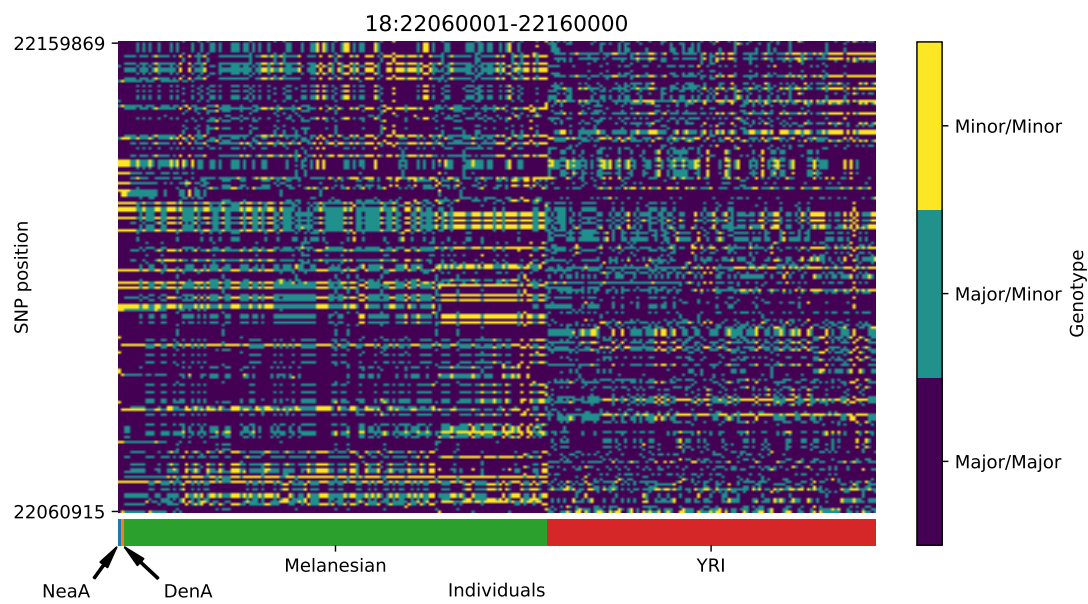

Figure S46: Genotype plot for the candidate region chr18:22060001-22160000 in the Denisovan-into-Melanesian AI scan. Dark blue = homozygote major allele, light blue = heterozygote, yellow = homozygote minor allele. Genotypes within populations are sorted left-to-right by similarity to the Denisovan.

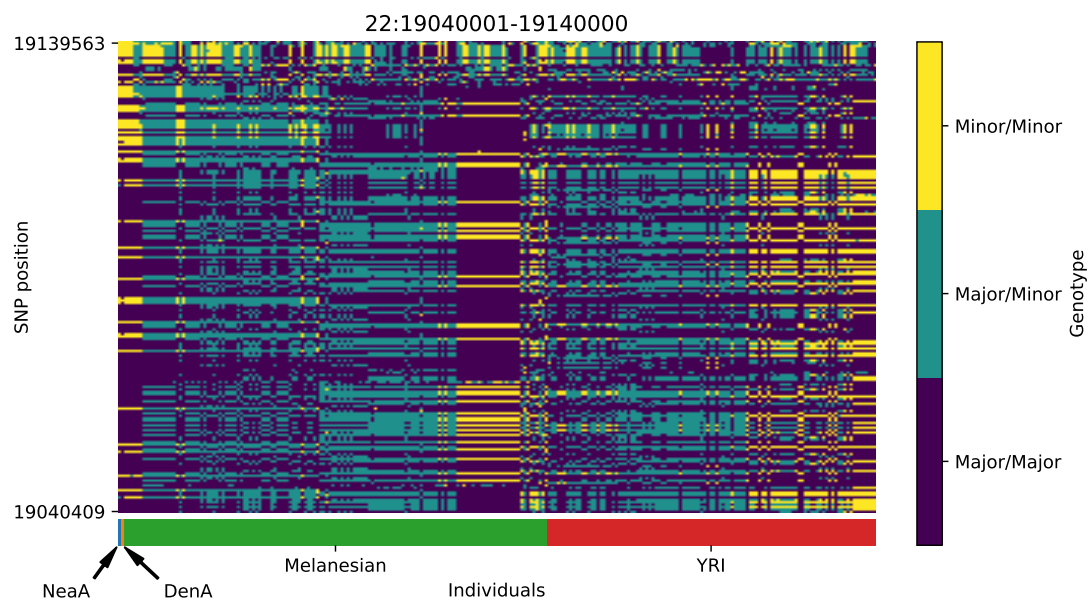

Figure S47: Genotype plot for the candidate region chr22:19040001-19140000 in the Denisovan-into-Melanesian AI scan. Dark blue = homozygote major allele, light blue = heterozygote, yellow = homozygote minor allele. Genotypes within populations are sorted left-to-right by similarity to the Denisovan.
